# Supplementary material for: Exceptional longevity of mammalian ovarian and oocyte macromolecules throughout the reproductive lifespan
Source: eLife journal article supplement (doi:10.7554/elife.93172), 2024-01-25

Figure 3—figure supplement 1A – source data 2

4-16% Tris-glycine gel, oocyte proteins lysate

oocyte 052721

Oriole stain , 4-15% Tris gel

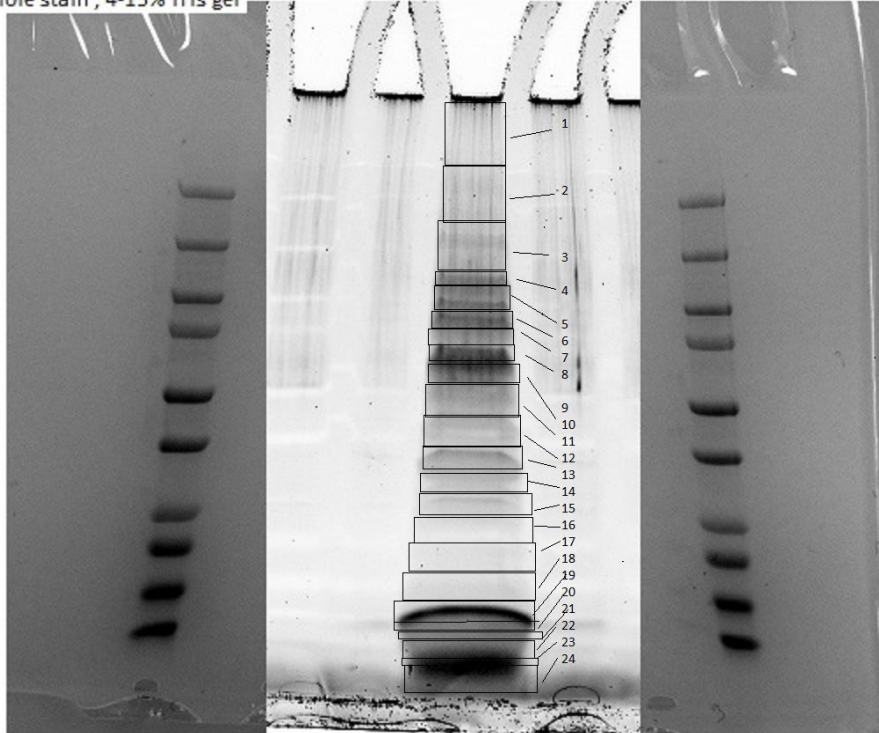

Supplement: fig3-figsupp1-data2 [file elife-93172-fig3-figsupp1-data2-v1.zip]
