# Supplementary material for: Exceptional longevity of mammalian ovarian and oocyte macromolecules throughout the reproductive lifespan
Source: eLife. 2024 Oct 31;13:RP93172. doi: 10.7554/eLife.93172 (PMC11527430; doi:10.7554/eLife.93172)
Supplement: Supplementary file 1. [file elife-93172-supp1.xlsx]

## Sheet: Sheet1
Accession	Gene name	14N peptides, 6 mo chase	15N peptides, 6 mo chase	14N peptides, 10 mo chase	15N peptides, 10 mo chase	15N-remaining at 6 mo (FA)	15N-remaining at 10 mo (FA)	Protein Description
P10761	Zp3	121	1	0	0	3.57392		Zona pellucida sperm-binding protein 3
P11983	Tcp1	176	1	203	0	1.89097		T-complex protein 1 subunit alpha
Q8CAQ8	Immt	423	1	158	0	1.44043		Mitochondrial inner membrane protein
Q99JY0	Hadhb	216	1	71	0	1.4178		Trifunctional enzyme subunit beta, mitochondrial
P53657	Pklr	35	1	28	0	1.22322		Pyruvate kinase PKLR
Q9QZQ8	H2afy	308	1	450	0	1.08565		Core histone macro-H2A.1
P62806	Hist1h4a	529	10	177	0	0.990099		Histone H4
P56480	Atp5b	1255	6	718	0	0.990099		ATP synthase subunit beta, mitochondrial
Q64522	Hist2h2ab	314	3	460	2	0.990099	1.21352	Histone H2A type 2-B
Q6GSS7	Hist2h2aa1	480	3	573	0	0.990099		Histone H2A type 2-A
Q64523	Hist2h2ac	464	3	568	0	0.990099		Histone H2A type 2-C
P68372	Tubb4b	602	1	869	21	0.990099	0.990099	Tubulin beta-4B chain
P99024	Tubb5	636	1	831	16	0.990099	0.990099	Tubulin beta-5 chain
Q7TMM9	Tubb2a	433	1	643	12	0.990099	1.03048	Tubulin beta-2A chain
Q9CWF2	Tubb2b	413	1	651	12	0.990099	1.01785	Tubulin beta-2B chain
Q9D6F9	Tubb4a	300	1	592	11	0.990099	0.990099	Tubulin beta-4A chain
P27661	H2afx	372	1	493	2	0.990099	1.33126	Histone H2AX
P63038	Hspd1	1254	1	683	0	0.990099		60 kDa heat shock protein, mitochondrial
Q03265	Atp5a1	1020	1	494	0	0.990099		ATP synthase subunit alpha, mitochondrial
P22752	Hist1h2ab	430	1	520	0	0.990099		Histone H2A type 1
Q8BFU2	Hist3h2a	430	1	520	0	0.990099		Histone H2A type 3
Q8CGP6	Hist1h2ah	430	1	518	0	0.990099		Histone H2A type 1-H
Q8CGP5	Hist1h2af	429	1	515	0	0.990099		Histone H2A type 1-F
Q8R1M2	H2afj	422	1	516	0	0.990099		Histone H2A.J
Q8CGP7	Hist1h2ak	412	1	515	0	0.990099		Histone H2A type 1-K
P84228	Hist1h3b	236	1	82	0	0.990099		Histone H3.2
Q8VEM8	Slc25a3	190	1	29	0	0.990099		Phosphate carrier protein, mitochondrial
P0C0S6	H2afz	189	1	177	0	0.990099		Histone H2A.Z
Q3THW5	H2afv	189	1	175	0	0.990099		Histone H2A.V
P51881	Slc25a5	180	1	120	0	0.990099		ADP/ATP translocase 2
P48962	Slc25a4	134	1	95	0	0.990099		ADP/ATP translocase 1
Q00896	Serpina1c	127	1	283	0	0.990099		Alpha-1-antitrypsin 1-3
Q9D3D9	Atp5d	102	1	53	0	0.990099		ATP synthase subunit delta, mitochondrial
Q02853	Mmp11	0	2	0	0			Stromelysin-3
Q9EPQ7	Stard5	8	1	16	0			StAR-related lipid transfer protein 5
A2ARZ3	Fsip2	5	1	3	0			Fibrous sheath-interacting protein 2
Q8BS35	Agmo	4	1	0	0			Alkylglycerol monooxygenase
Q3TLD5	Uri1	3	1	9	0			Unconventional prefoldin RPB5 interactor
O88783	F5	0	1	3	0			Coagulation factor V
P13516	Scd1	0	1	0	0			Acyl-CoA desaturase 1
Q8CDI7	Ccdc150	0	1	0	0			Coiled-coil domain-containing protein 150
P15392	Cyp2a4	0	1	0	0			Cytochrome P450 2A4
P20852	Cyp2a5	0	1	0	0			Cytochrome P450 2A5
Q61488	Dhh	0	1	0	0			Desert hedgehog protein
Q80ZA4	Pkhd1l1	0	1	0	0			Fibrocystin-L
Q80XH2	Impg2	0	1	0	0			Interphotoreceptor matrix proteoglycan 2
Q99NA9	Pcgf6	0	1	0	0			Polycomb group RING finger protein 6
Q8K214	Scmh1	0	1	0	0			Polycomb protein SCMH1
P21841	Sftpc	0	1	0	0			Pulmonary surfactant-associated protein C
A4Q9F4	Ttll11	0	1	0	0			Tubulin polyglutamylase TTLL11
Q8CF31	4	0	1	0	0			Uncharacterized protein C11orf94 homolog
P05213	Tuba1b	539	0	875	12		1.36986	Tubulin alpha-1B chain
P68369	Tuba1a	496	0	854	12		1.36568	Tubulin alpha-1A chain
P68368	Tuba4a	413	0	651	11		1.3155	Tubulin alpha-4A chain
P05214	Tuba3a	390	0	616	11		1.05381	Tubulin alpha-3 chain
Q922F4	Tubb6	264	0	419	10		2.64696	Tubulin beta-6 chain
Q9ERD7	Tubb3	251	0	444	10		2.18597	Tubulin beta-3 chain
P68373	Tuba1c	544	0	783	9		1.65585	Tubulin alpha-1C chain
Q9JJZ2	Tuba8	317	0	428	6		1.48768	Tubulin alpha-8 chain
A2BDX3	Mocs3	0	0	0	1			Adenylyltransferase and sulfurtransferase MOCS3
Q8JZU0	Nudt13	0	0	0	1			Nucleoside diphosphate-linked moiety X motif 13
Q5SW75	Ssh2	0	0	0	1			Protein phosphatase Slingshot homolog 2
P23440	Pde6b	0	0	0	1			Rod cGMP-specific 3&#039;,5&#039;-cyclic phosphodiesterase subunit beta
Q8VDD5	Myh9	1612	0	1207	0			Myosin-9
Q9QXS1	Plec	1161	0	642	0			Plectin
P07724	Alb	1150	0	1887	0			Serum albumin
P20029	Hspa5	1142	0	696	0			78 kDa glucose-regulated protein
P63017	Hspa8	1133	0	783	0			Heat shock cognate 71 kDa protein
P20152	Vim	1132	0	709	0			Vimentin
O08638	Myh11	999	0	3118	0			Myosin-11
P11499	Hsp90ab1	901	0	705	0			Heat shock protein HSP 90-beta
P60710	Actb	887	0	1296	0			Actin, cytoplasmic 1
P63260	Actg1	887	0	1296	0			Actin, cytoplasmic 2
Q8K023	Akr1c18	875	0	19	0			Aldo-keto reductase family 1 member C18
P09103	P4hb	874	0	426	0			Protein disulfide-isomerase
P34914	Ephx2	872	0	49	0			Bifunctional epoxide hydrolase 2
P08113	Hsp90b1	870	0	528	0			Endoplasmin
P26039	Tln1	863	0	1479	0			Talin-1
P16546	Sptan1	829	0	811	0			Spectrin alpha chain, non-erythrocytic 1
Q05920	Pc	786	0	123	0			Pyruvate carboxylase, mitochondrial
P68033	Actc1	757	0	1377	0			Actin, alpha cardiac muscle 1
O88844	Idh1	743	0	140	0			Isocitrate dehydrogenase [NADP] cytoplasmic
Q8BTM8	Flna	733	0	1932	0			Filamin-A
Q01853	Vcp	718	0	447	0			Transitional endoplasmic reticulum ATPase
P24815	Hsd3b1	715	0	14	0			3 beta-hydroxysteroid dehydrogenase/Delta 5-- 4-isomerase type 1
P38647	Hspa9	712	0	392	0			Stress-70 protein, mitochondrial
P68134	Acta1	706	0	1190	0			Actin, alpha skeletal muscle
Q9JHU4	Dync1h1	697	0	550	0			Cytoplasmic dynein 1 heavy chain 1
P62737	Acta2	696	0	1373	0			Actin, aortic smooth muscle
P63268	Actg2	694	0	1390	0			Actin, gamma-enteric smooth muscle
Q9QZ82	Cyp11a1	660	0	30	0			Cholesterol side-chain cleavage enzyme, mitochondrial
P07356	Anxa2	659	0	247	0			Annexin A2
P52480	Pkm	623	0	537	0			Pyruvate kinase PKM
Q61879	Myh10	616	0	842	0			Myosin-10
P06801	Me1	612	0	36	0			NADP-dependent malic enzyme
P06795	Abcb1b	606	0	20	0			Multidrug resistance protein 1B
Q64727	Vcl	597	0	673	0			Vinculin
P48678	Lmna	587	0	641	0			Prelamin-A/C
Q8CGK3	Lonp1	587	0	73	0			Lon protease homolog, mitochondrial
P58252	Eef2	581	0	551	0			Elongation factor 2
P27773	Pdia3	581	0	380	0			Protein disulfide-isomerase A3
P14733	Lmnb1	581	0	321	0			Lamin-B1
P14211	Calr	577	0	513	0			Calreticulin
Q68FD5	Cltc	557	0	494	0			Clathrin heavy chain 1
P14873	Map1b	554	0	252	0			Microtubule-associated protein 1B
P16858	Gapdh	525	0	511	0			Glyceraldehyde-3-phosphate dehydrogenase
P17182	Eno1	524	0	720	0			Alpha-enolase
Q62261	Sptbn1	508	0	483	0			Spectrin beta chain, non-erythrocytic 1
P10126	Eef1a1	502	0	783	0			Elongation factor 1-alpha 1
Q99KI0	Aco2	487	0	297	0			Aconitate hydratase, mitochondrial
P07901	Hsp90aa1	486	0	596	0			Heat shock protein HSP 90-alpha
Q61578	Fdxr	482	0	28	0			NADPH:adrenodoxin oxidoreductase, mitochondrial
Q91V92	Acly	462	0	157	0			ATP-citrate synthase
Q02053	Uba1	458	0	362	0			Ubiquitin-like modifier-activating enzyme 1
Q8CGP2	Hist1h2bp	447	0	248	0			Histone H2B type 1-P
P10853	Hist1h2bf	446	0	248	0			Histone H2B type 1-F/J/L
Q64475	Hist1h2bb	446	0	247	0			Histone H2B type 1-B
P57780	Actn4	445	0	551	0			Alpha-actinin-4
Q6ZWY9	Hist1h2bc	444	0	259	0			Histone H2B type 1-C/E/G
Q64478	Hist1h2bh	444	0	258	0			Histone H2B type 1-H
P10854	Hist1h2bm	444	0	258	0			Histone H2B type 1-M
Q64525	Hist2h2bb	444	0	258	0			Histone H2B type 2-B
Q7TPR4	Actn1	439	0	796	0			Alpha-actinin-1
Q64133	Maoa	435	0	31	0			Amine oxidase [flavin-containing] A
Q8BMS1	Hadha	434	0	233	0			Trifunctional enzyme subunit alpha, mitochondrial
Q8CGP1	Hist1h2bk	425	0	248	0			Histone H2B type 1-K
Q6IRU2	Tpm4	421	0	213	0			Tropomyosin alpha-4 chain
P40142	Tkt	414	0	392	0			Transketolase
P43274	Hist1h1e	414	0	223	0			Histone H1.4
P63101	Ywhaz	401	0	391	0			14-3-3 protein zeta/delta
O88492	Plin4	401	0	132	0			Perilipin-4
P08249	Mdh2	398	0	266	0			Malate dehydrogenase, mitochondrial
Q60932	Vdac1	398	0	184	0			Voltage-dependent anion-selective channel protein 1
Q9CQF9	Pcyox1	392	0	88	0			Prenylcysteine oxidase
P26041	Msn	391	0	310	0			Moesin
Q9JKF1	Iqgap1	389	0	245	0			Ras GTPase-activating-like protein IQGAP1
P43277	Hist1h1d	385	0	243	0			Histone H1.3
P09405	Ncl	375	0	336	0			Nucleolin
P05064	Aldoa	374	0	345	0			Fructose-bisphosphate aldolase A
P15864	Hist1h1c	372	0	182	0			Histone H1.2
Q9JKR6	Hyou1	370	0	219	0			Hypoxia up-regulated protein 1
P21447	Abcb1a	357	0	27	0			Multidrug resistance protein 1A
Q8BG05	Hnrnpa3	356	0	428	0			Heterogeneous nuclear ribonucleoprotein A3
Q8BW75	Maob	355	0	35	0			Amine oxidase [flavin-containing] B
P58771	Tpm1	350	0	524	0			Tropomyosin alpha-1 chain
Q9Z0X1	Aifm1	346	0	93	0			Apoptosis-inducing factor 1, mitochondrial
P46656	Fdx1	344	0	43	0			Adrenodoxin, mitochondrial
O88569	Hnrnpa2b1	341	0	355	0			Heterogeneous nuclear ribonucleoproteins A2/B1
Q921I1	Tf	336	0	395	0			Serotransferrin
Q61316	Hspa4	335	0	228	0			Heat shock 70 kDa protein 4
Q8VEK3	Hnrnpu	333	0	327	0			Heterogeneous nuclear ribonucleoprotein U
Q8BWT1	Acaa2	331	0	219	0			3-ketoacyl-CoA thiolase, mitochondrial
Q60597	Ogdh	329	0	148	0			2-oxoglutarate dehydrogenase, mitochondrial
Q00623	Apoa1	326	0	243	0			Apolipoprotein A-I
P09411	Pgk1	325	0	357	0			Phosphoglycerate kinase 1
Q99PL5	Rrbp1	325	0	234	0			Ribosome-binding protein 1
P10107	Anxa1	324	0	177	0			Annexin A1
Q05793	Hspg2	319	0	621	0			Basement membrane-specific heparan sulfate proteoglycan core protein
P47738	Aldh2	319	0	224	0			Aldehyde dehydrogenase, mitochondrial
Q920E5	Fdps	318	0	10	0			Farnesyl pyrophosphate synthase
P63158	Hmgb1	314	0	348	0			High mobility group protein B1
P17156	Hspa2	312	0	371	0			Heat shock-related 70 kDa protein 2
P17742	Ppia	311	0	214	0			Peptidyl-prolyl cis-trans isomerase A
P10922	H1f0	304	0	87	0			Histone H1.0
Q61425	Hadh	304	0	48	0			Hydroxyacyl-coenzyme A dehydrogenase, mitochondrial
P14824	Anxa6	302	0	435	0			Annexin A6
Q99N16	Cyp4f3	294	0	0	0			Leukotriene-B(4) omega-hydroxylase 2
P27546	Map4	291	0	159	0			Microtubule-associated protein 4
P01027	C3	290	0	536	0			Complement C3
P48036	Anxa5	288	0	269	0			Annexin A5
P60843	Eif4a1	288	0	211	0			Eukaryotic initiation factor 4A-I
Q64433	Hspe1	287	0	86	0			10 kDa heat shock protein, mitochondrial
P62259	Ywhae	285	0	270	0			14-3-3 protein epsilon
P35564	Canx	282	0	225	0			Calnexin
P08003	Pdia4	277	0	224	0			Protein disulfide-isomerase A4
P18760	Cfl1	270	0	177	0			Cofilin-1
Q922R8	Pdia6	268	0	274	0			Protein disulfide-isomerase A6
Q8R081	Hnrnpl	267	0	256	0			Heterogeneous nuclear ribonucleoprotein L
P32020	Scp2	265	0	50	0			Non-specific lipid-transfer protein
Q61937	Npm1	264	0	346	0			Nucleophosmin
P67778	Phb	264	0	169	0			Prohibitin
P61982	Ywhag	263	0	197	0			14-3-3 protein gamma
P58774	Tpm2	262	0	460	0			Tropomyosin beta chain
Q8VIJ6	Sfpq	262	0	233	0			Splicing factor, proline- and glutamine-rich
P35700	Prdx1	261	0	172	0			Peroxiredoxin-1
Q9D8E6	Rpl4	261	0	163	0			60S ribosomal protein L4
Q99LC5	Etfa	260	0	226	0			Electron transfer flavoprotein subunit alpha, mitochondrial
P21619	Lmnb2	259	0	181	0			Lamin-B2
Q61696	Hspa1a	257	0	396	0			Heat shock 70 kDa protein 1A
Q3UMF0	Cobll1	254	0	7	0			Cordon-bleu protein-like 1
P07759	Serpina3k	253	0	339	0			Serine protease inhibitor A3K
Q8VDN2	Atp1a1	252	0	300	0			Sodium/potassium-transporting ATPase subunit alpha-1
Q70IV5	Synm	251	0	199	0			Synemin
O70318	Epb41l2	251	0	114	0			Band 4.1-like protein 2
Q9D2U9	Hist3h2ba	249	0	207	0			Histone H2B type 3-A
Q8CGP0	Hist3h2bb	249	0	207	0			Histone H2B type 3-B
Q8BFZ3	Actbl2	247	0	444	0			Beta-actin-like protein 2
P01942	Hba	246	0	887	0			Hemoglobin subunit alpha
O35129	Phb2	246	0	88	0			Prohibitin-2
P17879	Hspa1b	245	0	356	0			Heat shock 70 kDa protein 1B
Q9R0P5	Dstn	245	0	168	0			Destrin
P24549	Aldh1a1	244	0	95	0			Retinal dehydrogenase 1
P61979	Hnrnpk	243	0	338	0			Heterogeneous nuclear ribonucleoprotein K
P21107	Tpm3	243	0	312	0			Tropomyosin alpha-3 chain
P14069	S100a6	243	0	41	0			Protein S100-A6
Q80YX1	Tnc	243	0	5	0			Tenascin
P26443	Glud1	238	0	228	0			Glutamate dehydrogenase 1, mitochondrial
P10649	Gstm1	237	0	179	0			Glutathione S-transferase Mu 1
Q8BFR5	Tufm	236	0	145	0			Elongation factor Tu, mitochondrial
Q9CQV8	Ywhab	235	0	225	0			14-3-3 protein beta/alpha
P80314	Cct2	235	0	222	0			T-complex protein 1 subunit beta
Q8CGC7	Eprs	235	0	153	0			Bifunctional glutamate/proline--tRNA ligase
P45376	Akr1b1	235	0	99	0			Aldose reductase
P50544	Acadvl	235	0	86	0			Very long-chain specific acyl-CoA dehydrogenase, mitochondrial
Q9DCN2	Cyb5r3	234	0	181	0			NADH-cytochrome b5 reductase 3
P14152	Mdh1	233	0	257	0			Malate dehydrogenase, cytoplasmic
Q9DCX2	Atp5h	233	0	64	0			ATP synthase subunit d, mitochondrial
Q9D0E1	Hnrnpm	231	0	192	0			Heterogeneous nuclear ribonucleoprotein M
Q60854	Serpinb6	231	0	91	0			Serpin B6
Q9CQN1	Trap1	229	0	72	0			Heat shock protein 75 kDa, mitochondrial
P13020	Gsn	227	0	494	0			Gelsolin
Q9JII6	Akr1a1	227	0	42	0			Alcohol dehydrogenase [NADP(+)]
P02088	Hbb-b1	226	0	1049	0			Hemoglobin subunit beta-1
P26231	Ctnna1	225	0	147	0			Catenin alpha-1
O08749	Dld	224	0	204	0			Dihydrolipoyl dehydrogenase, mitochondrial
P29341	Pabpc1	223	0	190	0			Polyadenylate-binding protein 1
P37040	Por	222	0	68	0			NADPH--cytochrome P450 reductase
Q04857	Col6a1	221	0	530	0			Collagen alpha-1(VI) chain
P62082	Rps7	221	0	157	0			40S ribosomal protein S7
P62204	Calm1	220	0	141	0			Calmodulin
P26043	Rdx	220	0	131	0			Radixin
P05202	Got2	219	0	194	0			Aspartate aminotransferase, mitochondrial
P97807	Fh	219	0	144	0			Fumarate hydratase, mitochondrial
Q9CZ13	Uqcrc1	218	0	128	0			Cytochrome b-c1 complex subunit 1, mitochondrial
Q8K2B3	Sdha	218	0	122	0			Succinate dehydrogenase [ubiquinone] flavoprotein subunit, mitochondrial
Q61598	Gdi2	217	0	238	0			Rab GDP dissociation inhibitor beta
Q64524	Hist2h2be	217	0	209	0			Histone H2B type 2-E
Q80X90	Flnb	216	0	330	0			Filamin-B
Q9EQ20	Aldh6a1	216	0	95	0			Methylmalonate-semialdehyde dehydrogenase [acylating], mitochondrial
P19324	Serpinh1	215	0	226	0			Serpin H1
P84244	H3f3a	214	0	117	0			Histone H3.3
P02301	H3f3c	214	0	117	0			Histone H3.3C
Q9Z2I0	Letm1	214	0	66	0			LETM1 and EF-hand domain-containing protein 1, mitochondrial
P11276	Fn1	212	0	451	0			Fibronectin
Q8BGQ7	Aars	212	0	110	0			Alanine--tRNA ligase, cytoplasmic
Q3UW53	Fam129a	212	0	54	0			Protein Niban
P99027	Rplp2	210	0	244	0			60S acidic ribosomal protein P2
Q93092	Taldo1	210	0	116	0			Transaldolase
Q60847	Col12a1	209	0	291	0			Collagen alpha-1(XII) chain
Q8QZT1	Acat1	209	0	218	0			Acetyl-CoA acetyltransferase, mitochondrial
Q61838	A2m	206	0	748	0			Alpha-2-macroglobulin
Q8VDJ3	Hdlbp	206	0	141	0			Vigilin
Q61768	Kif5b	204	0	154	0			Kinesin-1 heavy chain
Q9DB77	Uqcrc2	204	0	106	0			Cytochrome b-c1 complex subunit 2, mitochondrial
P43276	Hist1h1b	199	0	103	0			Histone H1.5
Q9DCW4	Etfb	199	0	91	0			Electron transfer flavoprotein subunit beta
Q9DBJ1	Pgam1	198	0	209	0			Phosphoglycerate mutase 1
Q9WU78	Pdcd6ip	198	0	114	0			Programmed cell death 6-interacting protein
P68433	Hist1h3a	198	0	50	0			Histone H3.1
P24472	Gsta4	197	0	46	0			Glutathione S-transferase A4
P51125	Cast	196	0	118	0			Calpastatin
P62897	Cycs	196	0	38	0			Cytochrome c, somatic
P40124	Cap1	195	0	162	0			Adenylyl cyclase-associated protein 1
P58281	Opa1	195	0	39	0			Dynamin-like 120 kDa protein, mitochondrial
P50516	Atp6v1a	194	0	101	0			V-type proton ATPase catalytic subunit A
F6ZDS4	Tpr	192	0	154	0			Nucleoprotein TPR
P70696	Hist1h2ba	191	0	115	0			Histone H2B type 1-A
O08709	Prdx6	190	0	170	0			Peroxiredoxin-6
P29758	Oat	190	0	141	0			Ornithine aminotransferase, mitochondrial
Q8BHN3	Ganab	190	0	113	0			Neutral alpha-glucosidase AB
P27659	Rpl3	188	0	171	0			60S ribosomal protein L3
Q91YQ5	Rpn1	188	0	139	0			Dolichyl-diphosphooligosaccharide--protein glycosyltransferase subunit 1
P80317	Cct6a	186	0	149	0			T-complex protein 1 subunit zeta
P31001	Des	184	0	805	0			Desmin
Q60930	Vdac2	184	0	106	0			Voltage-dependent anion-selective channel protein 2
Q91ZA3	Pcca	184	0	37	0			Propionyl-CoA carboxylase alpha chain, mitochondrial
O55143	Atp2a2	183	0	365	0			Sarcoplasmic/endoplasmic reticulum calcium ATPase 2
A6H584	Col6a5	183	0	74	0			Collagen alpha-5(VI) chain
Q8BH95	Echs1	183	0	70	0			Enoyl-CoA hydratase, mitochondrial
P68254	Ywhaq	182	0	239	0			14-3-3 protein theta
Q99PT1	Arhgdia	182	0	154	0			Rho GDP-dissociation inhibitor 1
P80318	Cct3	181	0	207	0			T-complex protein 1 subunit gamma
Q62318	Trim28	180	0	153	0			Transcription intermediary factor 1-beta
Q78PY7	Snd1	180	0	123	0			Staphylococcal nuclease domain-containing protein 1
Q9WTP7	Ak3	180	0	36	0			GTP:AMP phosphotransferase AK3, mitochondrial
P16125	Ldhb	179	0	263	0			L-lactate dehydrogenase B chain
P26645	Marcks	179	0	86	0			Myristoylated alanine-rich C-kinase substrate
Q62188	Dpysl3	177	0	209	0			Dihydropyrimidinase-related protein 3
Q99K48	Nono	177	0	207	0			Non-POU domain-containing octamer-binding protein
P23116	Eif3a	177	0	179	0			Eukaryotic translation initiation factor 3 subunit A
Q9WV55	Vapa	177	0	53	0			Vesicle-associated membrane protein-associated protein A
Q99PU5	Acsbg1	177	0	0	0			Long-chain-fatty-acid--CoA ligase ACSBG1
O08553	Dpysl2	176	0	230	0			Dihydropyrimidinase-related protein 2
Q9EQK5	Mvp	176	0	125	0			Major vault protein
P97449	Anpep	176	0	92	0			Aminopeptidase N
P06745	Gpi	175	0	165	0			Glucose-6-phosphate isomerase
P17751	Tpi1	174	0	343	0			Triosephosphate isomerase
P02089	Hbb-b2	173	0	807	0			Hemoglobin subunit beta-2
Q6PDN3	Mylk	173	0	602	0			Myosin light chain kinase, smooth muscle
P80315	Cct4	173	0	176	0			T-complex protein 1 subunit delta
Q6PIC6	Atp1a3	172	0	177	0			Sodium/potassium-transporting ATPase subunit alpha-3
O35459	Ech1	172	0	52	0			Delta(3,5)-Delta(2,4)-dienoyl-CoA isomerase, mitochondrial
P15626	Gstm2	171	0	130	0			Glutathione S-transferase Mu 2
P29391	Ftl1	171	0	66	0			Ferritin light chain 1
P31324	Prkar2b	171	0	42	0			cAMP-dependent protein kinase type II-beta regulatory subunit
P80316	Cct5	169	0	165	0			T-complex protein 1 subunit epsilon
P24270	Cat	169	0	67	0			Catalase
P20108	Prdx3	169	0	66	0			Thioredoxin-dependent peroxide reductase, mitochondrial
P97742	Cpt1a	169	0	20	0			Carnitine O-palmitoyltransferase 1, liver isoform
Q8BMK4	Ckap4	168	0	220	0			Cytoskeleton-associated protein 4
Q99JB2	Stoml2	168	0	85	0			Stomatin-like protein 2, mitochondrial
P20065	Tmsb4x	167	0	173	0			Thymosin beta-4
P62908	Rps3	167	0	99	0			40S ribosomal protein S3
Q8BMD8	Slc25a24	167	0	15	0			Calcium-binding mitochondrial carrier protein SCaMC-1
Q9CWJ9	Atic	166	0	178	0			Bifunctional purine biosynthesis protein PURH
P52825	Cpt2	166	0	28	0			Carnitine O-palmitoyltransferase 2, mitochondrial
Q9CZU6	Cs	165	0	125	0			Citrate synthase, mitochondrial
Q8CIE6	Copa	165	0	113	0			Coatomer subunit alpha
Q91Z53	Grhpr	165	0	39	0			Glyoxylate reductase/hydroxypyruvate reductase
Q76MZ3	Ppp2r1a	164	0	189	0			Serine/threonine-protein phosphatase 2A 65 kDa regulatory subunit A alpha isoform
P97351	Rps3a	164	0	82	0			40S ribosomal protein S3a
Q61941	Nnt	163	0	123	0			NAD(P) transhydrogenase, mitochondrial
Q9R0Y5	Ak1	163	0	26	0			Adenylate kinase isoenzyme 1
Q60598	Cttn	161	0	59	0			Src substrate cortactin
P26040	Ezr	159	0	256	0			Ezrin
P60335	Pcbp1	159	0	172	0			Poly(rC)-binding protein 1
Q91V61	Sfxn3	159	0	32	0			Sideroflexin-3
Q9QXZ0	Macf1	158	0	133	0			Microtubule-actin cross-linking factor 1
O08788	Dctn1	158	0	131	0			Dynactin subunit 1
P45952	Acadm	158	0	81	0			Medium-chain specific acyl-CoA dehydrogenase, mitochondrial
P39447	Tjp1	157	0	95	0			Tight junction protein ZO-1
P19096	Fasn	156	0	213	0			Fatty acid synthase
P68510	Ywhah	155	0	160	0			14-3-3 protein eta
P56399	Usp5	155	0	157	0			Ubiquitin carboxyl-terminal hydrolase 5
Q921H8	Acaa1a	155	0	68	0			3-ketoacyl-CoA thiolase A, peroxisomal
Q3U0V1	Khsrp	154	0	235	0			Far upstream element-binding protein 2
Q91ZX7	Lrp1	154	0	134	0			Prolow-density lipoprotein receptor-related protein 1
Q64435	Ugt1a6	154	0	68	0			UDP-glucuronosyltransferase 1-6
Q6P9K8	Caskin1	154	0	0	0			Caskin-1
P02468	Lamc1	153	0	271	0			Laminin subunit gamma-1
P22599	Serpina1b	152	0	368	0			Alpha-1-antitrypsin 1-2
Q8K310	Matr3	151	0	193	0			Matrin-3
Q9CZX8	Rps19	151	0	73	0			40S ribosomal protein S19
P19157	Gstp1	151	0	62	0			Glutathione S-transferase P 1
P06728	Apoa4	150	0	166	0			Apolipoprotein A-IV
P46935	Nedd4	150	0	129	0			E3 ubiquitin-protein ligase NEDD4
P47962	Rpl5	149	0	138	0			60S ribosomal protein L5
P08226	Apoe	149	0	58	0			Apolipoprotein E
P42932	Cct8	148	0	161	0			T-complex protein 1 subunit theta
P62960	Ybx1	148	0	137	0			Nuclease-sensitive element-binding protein 1
Q80UG5	45178	148	0	118	0			Septin-9
P18608	Hmgn1	148	0	49	0			Non-histone chromosomal protein HMG-14
P31786	Dbi	148	0	44	0			Acyl-CoA-binding protein
Q9CY58	Serbp1	147	0	168	0			Plasminogen activator inhibitor 1 RNA-binding protein
Q99L13	Hibadh	147	0	37	0			3-hydroxyisobutyrate dehydrogenase, mitochondrial
Q8K010	Oplah	147	0	27	0			5-oxoprolinase
P62631	Eef1a2	146	0	277	0			Elongation factor 1-alpha 2
Q71LX4	Tln2	145	0	324	0			Talin-2
Q00PI9	Hnrnpul2	145	0	103	0			Heterogeneous nuclear ribonucleoprotein U-like protein 2
Q8K1M6	Dnm1l	145	0	85	0			Dynamin-1-like protein
P17225	Ptbp1	144	0	133	0			Polypyrimidine tract-binding protein 1
Q99KC8	Vwa5a	144	0	102	0			von Willebrand factor A domain-containing protein 5A
Q8K0E8	Fgb	143	0	239	0			Fibrinogen beta chain
Q60864	Stip1	143	0	204	0			Stress-induced-phosphoprotein 1
P10630	Eif4a2	143	0	114	0			Eukaryotic initiation factor 4A-II
Q9JLJ2	Aldh9a1	143	0	93	0			4-trimethylaminobutyraldehyde dehydrogenase
Q99LX0	Park7	142	0	170	0			Protein DJ-1
P63276	Rps17	142	0	112	0			40S ribosomal protein S17
Q91VR2	Atp5c1	142	0	84	0			ATP synthase subunit gamma, mitochondrial
P43275	Hist1h1a	142	0	46	0			Histone H1.1
Q02788	Col6a2	140	0	387	0			Collagen alpha-2(VI) chain
O70133	Dhx9	140	0	113	0			ATP-dependent RNA helicase A
Q9Z2D6	Mecp2	139	0	96	0			Methyl-CpG-binding protein 2
Q9D0F9	Pgm1	139	0	59	0			Phosphoglucomutase-1
P26350	Ptma	139	0	37	0			Prothymosin alpha
P16627	Hspa1l	138	0	227	0			Heat shock 70 kDa protein 1-like
P12970	Rpl7a	138	0	89	0			60S ribosomal protein L7a
Q9DB20	Atp5o	138	0	53	0			ATP synthase subunit O, mitochondrial
O35658	C1qbp	138	0	48	0			Complement component 1 Q subcomponent-binding protein, mitochondrial
Q99MN9	Pccb	137	0	32	0			Propionyl-CoA carboxylase beta chain, mitochondrial
P18242	Ctsd	136	0	113	0			Cathepsin D
Q9Z1Z0	Uso1	136	0	103	0			General vesicular transport factor p115
P47911	Rpl6	136	0	83	0			60S ribosomal protein L6
Q6DFW4	Nop58	136	0	77	0			Nucleolar protein 58
Q3TEA8	Hp1bp3	136	0	63	0			Heterochromatin protein 1-binding protein 3
P54869	Hmgcs2	136	0	51	0			Hydroxymethylglutaryl-CoA synthase, mitochondrial
P42669	Pura	136	0	42	0			Transcriptional activator protein Pur-alpha
Q7TMK9	Syncrip	135	0	137	0			Heterogeneous nuclear ribonucleoprotein Q
P14869	Rplp0	135	0	122	0			60S acidic ribosomal protein P0
P80313	Cct7	135	0	122	0			T-complex protein 1 subunit eta
Q62167	Ddx3x	134	0	107	0			ATP-dependent RNA helicase DDX3X
P28271	Aco1	134	0	70	0			Cytoplasmic aconitate hydratase
P24369	Ppib	133	0	134	0			Peptidyl-prolyl cis-trans isomerase B
Q8VDM4	Psmd2	133	0	130	0			26S proteasome non-ATPase regulatory subunit 2
Q6P5E4	Uggt1	133	0	107	0			UDP-glucose:glycoprotein glucosyltransferase 1
Q8BIJ6	Iars2	133	0	69	0			Isoleucine--tRNA ligase, mitochondrial
P09602	Hmgn2	133	0	58	0			Non-histone chromosomal protein HMG-17
O55022	Pgrmc1	133	0	43	0			Membrane-associated progesterone receptor component 1
Q9WTP6	Ak2	133	0	38	0			Adenylate kinase 2, mitochondrial
Q61171	Prdx2	132	0	179	0			Peroxiredoxin-2
P97429	Anxa4	132	0	116	0			Annexin A4
Q9D8N0	Eef1g	132	0	104	0			Elongation factor 1-gamma
Q6ZWV3	Rpl10	131	0	95	0			60S ribosomal protein L10
P42208	45171	131	0	92	0			Septin-2
Q9D0M3	Cyc1	131	0	59	0			Cytochrome c1, heme protein, mitochondrial
O88342	Wdr1	130	0	108	0			WD repeat-containing protein 1
Q6ZWQ0	Syne2	130	0	101	0			Nesprin-2
O55131	45176	130	0	53	0			Septin-7
P07758	Serpina1a	129	0	300	0			Alpha-1-antitrypsin 1-1
P12787	Cox5a	129	0	86	0			Cytochrome c oxidase subunit 5A, mitochondrial
P14148	Rpl7	129	0	75	0			60S ribosomal protein L7
Q9WUM5	Suclg1	128	0	44	0			Succinyl-CoA ligase [ADP/GDP-forming] subunit alpha, mitochondrial
Q9CQQ7	Atp5f1	128	0	18	0			ATP synthase F(0) complex subunit B1, mitochondrial
O88685	Psmc3	127	0	108	0			26S protease regulatory subunit 6A
P14206	Rpsa	127	0	97	0			40S ribosomal protein SA
Q8BRT1	Clasp2	126	0	29	0			CLIP-associating protein 2
Q8VCW8	Acsf2	125	0	143	0			Acyl-CoA synthetase family member 2, mitochondrial
Q01768	Nme2	125	0	139	0			Nucleoside diphosphate kinase B
Q61029	Tmpo	125	0	89	0			Lamina-associated polypeptide 2, isoforms beta/delta/epsilon/gamma
Q9Z2I8	Suclg2	125	0	63	0			Succinyl-CoA ligase [GDP-forming] subunit beta, mitochondrial
Q8CAY6	Acat2	125	0	27	0			Acetyl-CoA acetyltransferase, cytosolic
Q99NB9	Sf3b1	124	0	160	0			Splicing factor 3B subunit 1
P50247	Ahcy	124	0	157	0			Adenosylhomocysteinase
Q61033	Tmpo	124	0	79	0			Lamina-associated polypeptide 2, isoforms alpha/zeta
Q3UPL0	Sec31a	124	0	76	0			Protein transport protein Sec31A
Q8BH59	Slc25a12	124	0	57	0			Calcium-binding mitochondrial carrier protein Aralar1
Q920A5	Scpep1	124	0	25	0			Retinoid-inducible serine carboxypeptidase
P17710	Hk1	123	0	110	0			Hexokinase-1
Q7TPV4	Mybbp1a	123	0	60	0			Myb-binding protein 1A
A2AX52	Col6a4	122	0	389	0			Collagen alpha-4(VI) chain
P49312	Hnrnpa1	122	0	197	0			Heterogeneous nuclear ribonucleoprotein A1
Q6ZQM8	Ugt1a7c	122	0	56	0			UDP-glucuronosyltransferase 1-7C
Q63886	Ugt1a1	121	0	78	0			UDP-glucuronosyltransferase 1-1
Q62452	Ugt1a9	121	0	56	0			UDP-glucuronosyltransferase 1-9
P70691	Ugt1a2	121	0	55	0			UDP-glucuronosyltransferase 1-2
P51660	Hsd17b4	121	0	48	0			Peroxisomal multifunctional enzyme type 2
P62983	Rps27a	120	0	114	0			Ubiquitin-40S ribosomal protein S27a
Q07417	Acads	120	0	32	0			Short-chain specific acyl-CoA dehydrogenase, mitochondrial
P70296	Pebp1	119	0	118	0			Phosphatidylethanolamine-binding protein 1
Q8K4Z5	Sf3a1	119	0	113	0			Splicing factor 3A subunit 1
P02469	Lamb1	118	0	132	0			Laminin subunit beta-1
P61161	Actr2	118	0	83	0			Actin-related protein 2
P42125	Eci1	118	0	42	0			Enoyl-CoA delta isomerase 1, mitochondrial
Q9DBG6	Rpn2	117	0	186	0			Dolichyl-diphosphooligosaccharide--protein glycosyltransferase subunit 2
Q99PV0	Prpf8	117	0	94	0			Pre-mRNA-processing-splicing factor 8
Q99P72	Rtn4	117	0	83	0			Reticulon-4
Q60605	Myl6	116	0	220	0			Myosin light polypeptide 6
Q922D8	Mthfd1	116	0	145	0			C-1-tetrahydrofolate synthase, cytoplasmic
P47963	Rpl13	116	0	80	0			60S ribosomal protein L13
O09167	Rpl21	116	0	51	0			60S ribosomal protein L21
Q6PB66	Lrpprc	116	0	36	0			Leucine-rich PPR motif-containing protein, mitochondrial
P10852	Slc3a2	116	0	28	0			4F2 cell-surface antigen heavy chain
Q9CU62	Smc1a	115	0	131	0			Structural maintenance of chromosomes protein 1A
Q9Z2X1	Hnrnpf	115	0	129	0			Heterogeneous nuclear ribonucleoprotein F
Q60668	Hnrnpd	115	0	124	0			Heterogeneous nuclear ribonucleoprotein D0
P30416	Fkbp4	115	0	119	0			Peptidyl-prolyl cis-trans isomerase FKBP4
P63037	Dnaja1	115	0	108	0			DnaJ homolog subfamily A member 1
Q07133	Hist1h1t	115	0	60	0			Histone H1t
Q61292	Lamb2	114	0	292	0			Laminin subunit beta-2
P50396	Gdi1	114	0	149	0			Rab GDP dissociation inhibitor alpha
Q6PDQ2	Chd4	114	0	118	0			Chromodomain-helicase-DNA-binding protein 4
Q9CPV4	Glod4	114	0	97	0			Glyoxalase domain-containing protein 4
Q9D1A2	Cndp2	114	0	83	0			Cytosolic non-specific dipeptidase
Q8JZQ9	Eif3b	114	0	46	0			Eukaryotic translation initiation factor 3 subunit B
Q8CCK0	H2afy2	113	0	152	0			Core histone macro-H2A.2
P56959	Fus	113	0	88	0			RNA-binding protein FUS
Q02819	Nucb1	113	0	84	0			Nucleobindin-1
Q9D6Z1	Nop56	113	0	37	0			Nucleolar protein 56
Q91VI7	Rnh1	112	0	139	0			Ribonuclease inhibitor
Q99L45	Eif2s2	112	0	74	0			Eukaryotic translation initiation factor 2 subunit 2
P42225	Stat1	112	0	12	0			Signal transducer and activator of transcription 1
Q6ZQ38	Cand1	111	0	136	0			Cullin-associated NEDD8-dissociated protein 1
P54071	Idh2	111	0	129	0			Isocitrate dehydrogenase [NADP], mitochondrial
P57776	Eef1d	111	0	113	0			Elongation factor 1-delta
Q99020	Hnrnpab	111	0	84	0			Heterogeneous nuclear ribonucleoprotein A/B
P61255	Rpl26	111	0	61	0			60S ribosomal protein L26
O35143	Atpif1	111	0	11	0			ATPase inhibitor, mitochondrial
Q8BFW7	Lpp	110	0	264	0			Lipoma-preferred partner homolog
O35737	Hnrnph1	110	0	152	0			Heterogeneous nuclear ribonucleoprotein H
P26638	Sars	110	0	69	0			Serine--tRNA ligase, cytoplasmic
P39054	Dnm2	110	0	68	0			Dynamin-2
P14685	Psmd3	110	0	65	0			26S proteasome non-ATPase regulatory subunit 3
Q8BI84	Mia3	110	0	55	0			Melanoma inhibitory activity protein 3
O89017	Lgmn	110	0	10	0			Legumain
P29699	Ahsg	109	0	277	0			Alpha-2-HS-glycoprotein
Q61147	Cp	109	0	168	0			Ceruloplasmin
P51859	Hdgf	109	0	85	0			Hepatoma-derived growth factor
Q9DCD0	Pgd	109	0	83	0			6-phosphogluconate dehydrogenase, decarboxylating
Q9D379	Ephx1	109	0	61	0			Epoxide hydrolase 1
Q9R0P3	Esd	109	0	59	0			S-formylglutathione hydrolase
Q9R1P4	Psma1	109	0	51	0			Proteasome subunit alpha type-1
Q99NB1	Acss1	109	0	0	0			Acetyl-coenzyme A synthetase 2-like, mitochondrial
Q3TXS7	Psmd1	108	0	106	0			26S proteasome non-ATPase regulatory subunit 1
P62754	Rps6	108	0	98	0			40S ribosomal protein S6
Q99JY9	Actr3	108	0	96	0			Actin-related protein 3
Q64378	Fkbp5	108	0	7	0			Peptidyl-prolyl cis-trans isomerase FKBP5
Q6PIE5	Atp1a2	107	0	174	0			Sodium/potassium-transporting ATPase subunit alpha-2
P49722	Psma2	107	0	105	0			Proteasome subunit alpha type-2
P84099	Rpl19	107	0	85	0			60S ribosomal protein L19
O08795	Prkcsh	107	0	67	0			Glucosidase 2 subunit beta
Q8CC88	Vwa8	107	0	27	0			von Willebrand factor A domain-containing protein 8
Q8CI94	Pygb	106	0	243	0			Glycogen phosphorylase, brain form
Q69ZN7	Myof	106	0	177	0			Myoferlin
Q9EPC1	Parva	106	0	149	0			Alpha-parvin
Q61081	Cdc37	106	0	62	0			Hsp90 co-chaperone Cdc37
P63028	Tpt1	106	0	52	0			Translationally-controlled tumor protein
Q8R0Y6	Aldh1l1	106	0	21	0			Cytosolic 10-formyltetrahydrofolate dehydrogenase
Q04447	Ckb	105	0	565	0			Creatine kinase B-type
P54775	Psmc4	105	0	103	0			26S protease regulatory subunit 6B
P16381	D1Pas1	105	0	96	0			Putative ATP-dependent RNA helicase Pl10
P30999	Ctnnd1	105	0	95	0			Catenin delta-1
Q61233	Lcp1	105	0	72	0			Plastin-2
P11352	Gpx1	105	0	71	0			Glutathione peroxidase 1
Q9D2G2	Dlst	105	0	41	0			Dihydrolipoyllysine-residue succinyltransferase component of 2-oxoglutarate dehydrogenase complex, mitochondrial
P51557	Star	105	0	0	0			Steroidogenic acute regulatory protein, mitochondrial
Q61656	Ddx5	104	0	146	0			Probable ATP-dependent RNA helicase DDX5
O08810	Eftud2	104	0	117	0			116 kDa U5 small nuclear ribonucleoprotein component
Q61990	Pcbp2	104	0	110	0			Poly(rC)-binding protein 2
P10605	Ctsb	104	0	105	0			Cathepsin B
O88487	Dync1i2	104	0	104	0			Cytoplasmic dynein 1 intermediate chain 2
Q9R0P9	Uchl1	104	0	50	0			Ubiquitin carboxyl-terminal hydrolase isozyme L1
Q9ERU9	Ranbp2	104	0	45	0			E3 SUMO-protein ligase RanBP2
Q9DBL1	Acadsb	104	0	30	0			Short/branched chain specific acyl-CoA dehydrogenase, mitochondrial
P82198	Tgfbi	103	0	195	0			Transforming growth factor-beta-induced protein ig-h3
Q501J6	Ddx17	103	0	158	0			Probable ATP-dependent RNA helicase DDX17
Q9CW03	Smc3	103	0	125	0			Structural maintenance of chromosomes protein 3
Q60931	Vdac3	103	0	74	0			Voltage-dependent anion-selective channel protein 3
Q9D1D4	Tmed10	103	0	73	0			Transmembrane emp24 domain-containing protein 10
P35980	Rpl18	103	0	53	0			60S ribosomal protein L18
Q9Z2U0	Psma7	103	0	51	0			Proteasome subunit alpha type-7
P37804	Tagln	102	0	394	0			Transgelin
Q8R1B4	Eif3c	102	0	115	0			Eukaryotic translation initiation factor 3 subunit C
Q9EQU5	Set	102	0	101	0			Protein SET
Q91VM5	Rbmxl1	102	0	95	0			RNA binding motif protein, X-linked-like-1
Q91W90	Txndc5	102	0	94	0			Thioredoxin domain-containing protein 5
P47955	Rplp1	102	0	80	0			60S acidic ribosomal protein P1
Q62465	Vat1	102	0	80	0			Synaptic vesicle membrane protein VAT-1 homolog
P62192	Psmc1	102	0	76	0			26S protease regulatory subunit 4
Q8BPB5	Efemp1	102	0	69	0			EGF-containing fibulin-like extracellular matrix protein 1
Q922J3	Clip1	102	0	55	0			CAP-Gly domain-containing linker protein 1
Q9CRB9	Chchd3	102	0	22	0			Coiled-coil-helix-coiled-coil-helix domain-containing protein 3, mitochondrial
Q3UQ44	Iqgap2	102	0	22	0			Ras GTPase-activating-like protein IQGAP2
Q11011	Npepps	101	0	135	0			Puromycin-sensitive aminopeptidase
A2AN08	Ubr4	101	0	69	0			E3 ubiquitin-protein ligase UBR4
P97450	Atp5j	101	0	38	0			ATP synthase-coupling factor 6, mitochondrial
P70333	Hnrnph2	100	0	97	0			Heterogeneous nuclear ribonucleoprotein H2
Q9D0F3	Lman1	100	0	47	0			Protein ERGIC-53
Q8VCM7	Fgg	99	0	219	0			Fibrinogen gamma chain
P62702	Rps4x	99	0	105	0			40S ribosomal protein S4, X isoform
P62814	Atp6v1b2	99	0	79	0			V-type proton ATPase subunit B, brain isoform
P23198	Cbx3	99	0	60	0			Chromobox protein homolog 3
O35887	Calu	98	0	158	0			Calumenin
P45591	Cfl2	98	0	71	0			Cofilin-2
Q9CQ62	Decr1	98	0	60	0			2,4-dienoyl-CoA reductase, mitochondrial
O35295	Purb	98	0	29	0			Transcriptional activator protein Pur-beta
O08917	Flot1	98	0	27	0			Flotillin-1
Q64521	Gpd2	98	0	16	0			Glycerol-3-phosphate dehydrogenase, mitochondrial
P06797	Ctsl	98	0	11	0			Cathepsin L1
P21981	Tgm2	97	0	266	0			Protein-glutamine gamma-glutamyltransferase 2
Q3THE2	Myl12b	97	0	186	0			Myosin regulatory light chain 12B
O08529	Capn2	97	0	135	0			Calpain-2 catalytic subunit
P70372	Elavl1	97	0	61	0			ELAV-like protein 1
P99028	Uqcrh	97	0	28	0			Cytochrome b-c1 complex subunit 6, mitochondrial
Q78IK4	Apool	97	0	6	0			Apolipoprotein O-like
O08583	Alyref	96	0	73	0			THO complex subunit 4
Q9D172	D10Jhu81e	96	0	58	0			ES1 protein homolog, mitochondrial
Q60710	Samhd1	96	0	51	0			Deoxynucleoside triphosphate triphosphohydrolase SAMHD1
Q9Z1N5	Ddx39b	95	0	87	0			Spliceosome RNA helicase Ddx39b
P62918	Rpl8	95	0	68	0			60S ribosomal protein L8
O35286	Dhx15	95	0	61	0			Putative pre-mRNA-splicing factor ATP-dependent RNA helicase DHX15
Q61335	Bcap31	95	0	37	0			B-cell receptor-associated protein 31
Q9CXS4	Cenpv	95	0	35	0			Centromere protein V
Q9DCS3	Mecr	95	0	24	0			Trans-2-enoyl-CoA reductase, mitochondrial
P53395	Dbt	95	0	14	0			Lipoamide acyltransferase component of branched-chain alpha-keto acid dehydrogenase complex, mitochondrial
Q6P4T2	Snrnp200	94	0	139	0			U5 small nuclear ribonucleoprotein 200 kDa helicase
Q8BL66	Eea1	94	0	99	0			Early endosome antigen 1
Q9D6R2	Idh3a	94	0	63	0			Isocitrate dehydrogenase [NAD] subunit alpha, mitochondrial
D3YXK2	Safb	94	0	54	0			Scaffold attachment factor B1
O35945	Aldh1a7	94	0	42	0			Aldehyde dehydrogenase, cytosolic 1
Q9EPL9	Acox3	94	0	4	0			Peroxisomal acyl-coenzyme A oxidase 3
O35469	Hsd3b6	94	0	0	0			3 beta-hydroxysteroid dehydrogenase/Delta 5-- 4-isomerase type 6
Q9WVA4	Tagln2	93	0	176	0			Transgelin-2
Q9CZ44	Nsfl1c	93	0	125	0			NSFL1 cofactor p47
P30681	Hmgb2	93	0	116	0			High mobility group protein B2
Q8BMF4	Dlat	93	0	54	0			Dihydrolipoyllysine-residue acetyltransferase component of pyruvate dehydrogenase complex, mitochondrial
Q8CIM3	D2hgdh	93	0	20	0			D-2-hydroxyglutarate dehydrogenase, mitochondrial
Q8JZQ2	Afg3l2	93	0	10	0			AFG3-like protein 2
Q8CIB5	Fermt2	92	0	196	0			Fermitin family homolog 2
P63242	Eif5a	92	0	160	0			Eukaryotic translation initiation factor 5A-1
P0CG49	Ubb	92	0	102	0			Polyubiquitin-B
P62984	Uba52	92	0	102	0			Ubiquitin-60S ribosomal protein L40
Q64010	Crk	92	0	73	0			Adapter molecule crk
Q02248	Ctnnb1	92	0	72	0			Catenin beta-1
Q9DBF1	Aldh7a1	92	0	70	0			Alpha-aminoadipic semialdehyde dehydrogenase
Q6A0A9	FAM120A	92	0	46	0			Constitutive coactivator of PPAR-gamma-like protein 1
O08532	Cacna2d1	92	0	25	0			Voltage-dependent calcium channel subunit alpha-2/delta-1
P0CG50	Ubc	91	0	102	0			Polyubiquitin-C
O35381	Anp32a	91	0	98	0			Acidic leucine-rich nuclear phosphoprotein 32 family member A
P62827	Ran	91	0	88	0			GTP-binding nuclear protein Ran
P28667	Marcksl1	91	0	54	0			MARCKS-related protein
Q9EQH3	Vps35	91	0	52	0			Vacuolar protein sorting-associated protein 35
Q9QYR6	Map1a	91	0	41	0			Microtubule-associated protein 1A
Q9D154	Serpinb1a	91	0	13	0			Leukocyte elastase inhibitor A
Q8BGD9	Eif4b	90	0	108	0			Eukaryotic translation initiation factor 4B
P86048	Rpl10l	90	0	61	0			60S ribosomal protein L10-like
Q91ZW3	Smarca5	90	0	53	0			SWI/SNF-related matrix-associated actin-dependent regulator of chromatin subfamily A member 5
Q9D855	Uqcrb	90	0	31	0			Cytochrome b-c1 complex subunit 7
Q61166	Mapre1	89	0	86	0			Microtubule-associated protein RP/EB family member 1
O55029	Copb2	89	0	78	0			Coatomer subunit beta&#039;
Q91V41	Rab14	89	0	59	0			Ras-related protein Rab-14
P62242	Rps8	89	0	50	0			40S ribosomal protein S8
Q921G7	Etfdh	89	0	32	0			Electron transfer flavoprotein-ubiquinone oxidoreductase, mitochondrial
Q8BSE0	Rmdn2	89	0	0	0			Regulator of microtubule dynamics protein 2
Q99K41	Emilin1	88	0	208	0			EMILIN-1
Q7TMY8	Huwe1	88	0	104	0			E3 ubiquitin-protein ligase HUWE1
Q99KJ8	Dctn2	88	0	68	0			Dynactin subunit 2
Q99L47	St13	88	0	42	0			Hsc70-interacting protein
Q61543	Glg1	88	0	38	0			Golgi apparatus protein 1
Q9DCJ9	Npl	88	0	37	0			N-acetylneuraminate lyase
Q8BP47	Nars	88	0	35	0			Asparagine--tRNA ligase, cytoplasmic
O35857	Timm44	88	0	22	0			Mitochondrial import inner membrane translocase subunit TIM44
O54724	Ptrf	87	0	226	0			Polymerase I and transcript release factor
Q8BX02	Kank2	87	0	124	0			KN motif and ankyrin repeat domain-containing protein 2
Q6ZWX6	Eif2s1	87	0	86	0			Eukaryotic translation initiation factor 2 subunit 1
O54734	Ddost	87	0	82	0			Dolichyl-diphosphooligosaccharide--protein glycosyltransferase 48 kDa subunit
Q6NZJ6	Eif4g1	87	0	78	0			Eukaryotic translation initiation factor 4 gamma 1
Q921M3	Sf3b3	87	0	66	0			Splicing factor 3B subunit 3
P21614	Gc	87	0	63	0			Vitamin D-binding protein
P63325	Rps10	87	0	55	0			40S ribosomal protein S10
Q8VCH0	Acaa1b	87	0	48	0			3-ketoacyl-CoA thiolase B, peroxisomal
P16332	Mut	87	0	47	0			Methylmalonyl-CoA mutase, mitochondrial
Q9CQA3	Sdhb	87	0	24	0			Succinate dehydrogenase [ubiquinone] iron-sulfur subunit, mitochondrial
Q61699	Hsph1	86	0	115	0			Heat shock protein 105 kDa
Q9Z204	Hnrnpc	86	0	112	0			Heterogeneous nuclear ribonucleoproteins C1/C2
Q9QZE5	Copg1	86	0	104	0			Coatomer subunit gamma-1
Q8VDP4	Ccar2	86	0	56	0			Cell cycle and apoptosis regulator protein 2
P97855	G3bp1	86	0	48	0			Ras GTPase-activating protein-binding protein 1
Q99JR1	Sfxn1	86	0	31	0			Sideroflexin-1
Q9CQX2	Cyb5b	86	0	19	0			Cytochrome b5 type B
P62196	Psmc5	85	0	100	0			26S protease regulatory subunit 8
Q60865	Caprin1	85	0	75	0			Caprin-1
Q5SUR0	Pfas	85	0	67	0			Phosphoribosylformylglycinamidine synthase
Q8CDN6	Txnl1	85	0	56	0			Thioredoxin-like protein 1
Q9CQH7	Btf3l4	85	0	56	0			Transcription factor BTF3 homolog 4
Q9CZW5	Tomm70a	85	0	55	0			Mitochondrial import receptor subunit TOM70
P46425	Gstp2	85	0	41	0			Glutathione S-transferase P 2
Q91VC3	Eif4a3	84	0	82	0			Eukaryotic initiation factor 4A-III
P09813	Apoa2	84	0	69	0			Apolipoprotein A-II
Q9Z2I9	Sucla2	84	0	63	0			Succinyl-CoA ligase [ADP-forming] subunit beta, mitochondrial
Q9QXX4	Slc25a13	84	0	60	0			Calcium-binding mitochondrial carrier protein Aralar2
Q64331	Myo6	84	0	51	0			Unconventional myosin-VI
O09061	Psmb1	84	0	39	0			Proteasome subunit beta type-1
P52196	Tst	84	0	12	0			Thiosulfate sulfurtransferase
P97479	Myo7a	84	0	0	0			Unconventional myosin-VIIa
P16045	Lgals1	83	0	186	0			Galectin-1
Q9WTI7	Myo1c	83	0	110	0			Unconventional myosin-Ic
P46471	Psmc2	83	0	85	0			26S protease regulatory subunit 7
Q9CZS1	Aldh1b1	83	0	71	0			Aldehyde dehydrogenase X, mitochondrial
Q9CPR4	Rpl17	83	0	64	0			60S ribosomal protein L17
Q6PDI5	Ecm29	83	0	54	0			Proteasome-associated protein ECM29 homolog
P21440	Abcb4	83	0	3	0			Multidrug resistance protein 3
P68040	Gnb2l1	82	0	96	0			Guanine nucleotide-binding protein subunit beta-2-like 1
P48758	Cbr1	82	0	77	0			Carbonyl reductase [NADPH] 1
Q8C1B7	45180	82	0	65	0			Septin-11
P67984	Rpl22	82	0	38	0			60S ribosomal protein L22
Q9JMH9	Myo18a	82	0	31	0			Unconventional myosin-XVIIIa
Q791V5	Mtch2	82	0	20	0			Mitochondrial carrier homolog 2
O88428	Papss2	82	0	0	0			Bifunctional 3&#039;-phosphoadenosine 5&#039;-phosphosulfate synthase 2
P28665	Mug1	81	0	189	0			Murinoglobulin-1
Q9WV02	Rbmx	81	0	95	0			RNA-binding motif protein, X chromosome
P99029	Prdx5	81	0	66	0			Peroxiredoxin-5, mitochondrial
Q9CQ60	Pgls	81	0	56	0			6-phosphogluconolactonase
O89079	Cope	81	0	55	0			Coatomer subunit epsilon
Q91YW3	Dnajc3	81	0	42	0			DnaJ homolog subfamily C member 3
Q9DBR7	Ppp1r12a	80	0	147	0			Protein phosphatase 1 regulatory subunit 12A
P84078	Arf1	80	0	115	0			ADP-ribosylation factor 1
Q9DBG5	Plin3	80	0	95	0			Perilipin-3
P15532	Nme1	80	0	79	0			Nucleoside diphosphate kinase A
P47754	Capza2	80	0	58	0			F-actin-capping protein subunit alpha-2
Q99MR6	Srrt	80	0	56	0			Serrate RNA effector molecule homolog
Q62418	Dbnl	80	0	44	0			Drebrin-like protein
P46638	Rab11b	80	0	30	0			Ras-related protein Rab-11B
Q9Z2H5	Epb41l1	80	0	12	0			Band 4.1-like protein 1
Q921F2	Tardbp	79	0	130	0			TAR DNA-binding protein 43
P61205	Arf3	79	0	103	0			ADP-ribosylation factor 3
Q62095	Ddx3y	79	0	79	0			ATP-dependent RNA helicase DDX3Y
Q78ZA7	Nap1l4	79	0	77	0			Nucleosome assembly protein 1-like 4
P97371	Psme1	79	0	66	0			Proteasome activator complex subunit 1
Q9Z1Q5	Clic1	79	0	61	0			Chloride intracellular channel protein 1
P09671	Sod2	79	0	58	0			Superoxide dismutase [Mn], mitochondrial
P14131	Rps16	79	0	35	0			40S ribosomal protein S16
P26150	Hsd3b3	79	0	0	0			3 beta-hydroxysteroid dehydrogenase/Delta 5-- 4-isomerase type 3
P23953	Ces1c	78	0	125	0			Carboxylesterase 1C
Q91WJ8	Fubp1	78	0	110	0			Far upstream element-binding protein 1
Q9CXY6	Ilf2	78	0	102	0			Interleukin enhancer-binding factor 2
Q8R3B1	Plcd1	78	0	58	0			1-phosphatidylinositol 4,5-bisphosphate phosphodiesterase delta-1
P62301	Rps13	78	0	39	0			40S ribosomal protein S13
Q8C8U0	Ppfibp1	78	0	34	0			Liprin-beta-1
P14115	Rpl27a	78	0	24	0			60S ribosomal protein L27a
Q19LI2	A1bg	77	0	192	0			Alpha-1B-glycoprotein
P62874	Gnb1	77	0	165	0			Guanine nucleotide-binding protein G(I)/G(S)/G(T) subunit beta-1
Q99LF4	Rtcb	77	0	108	0			tRNA-splicing ligase RtcB homolog
Q9ET54	Palld	77	0	97	0			Palladin
Q920B9	Supt16h	77	0	51	0			FACT complex subunit SPT16
P55264	Adk	77	0	43	0			Adenosine kinase
Q9WUM3	Coro1b	77	0	41	0			Coronin-1B
Q80WJ7	Mtdh	77	0	28	0			Protein LYRIC
P70168	Kpnb1	76	0	118	0			Importin subunit beta-1
P62270	Rps18	76	0	65	0			40S ribosomal protein S18
Q06890	Clu	76	0	62	0			Clusterin
Q9DCH4	Eif3f	76	0	61	0			Eukaryotic translation initiation factor 3 subunit F
Q9ERK4	Cse1l	76	0	59	0			Exportin-2
Q9CQ65	Mtap	76	0	57	0			S-methyl-5&#039;-thioadenosine phosphorylase
Q9Z1R2	Bag6	76	0	52	0			Large proline-rich protein BAG6
O54988	Slk	76	0	50	0			STE20-like serine/threonine-protein kinase
Q6ZWN5	Rps9	76	0	43	0			40S ribosomal protein S9
P03958	Ada	76	0	38	0			Adenosine deaminase
Q8BFZ9	Erlin2	76	0	30	0			Erlin-2
Q80W21	Gstm7	75	0	83	0			Glutathione S-transferase Mu 7
Q9JIF7	Copb1	75	0	68	0			Coatomer subunit beta
Q9CZD3	Gars	75	0	62	0			Glycine--tRNA ligase
P62281	Rps11	75	0	49	0			40S ribosomal protein S11
P62830	Rpl23	75	0	48	0			60S ribosomal protein L23
Q9WTX5	Skp1	74	0	112	0			S-phase kinase-associated protein 1
Q922B2	Dars	74	0	66	0			Aspartate--tRNA ligase, cytoplasmic
P53026	Rpl10a	74	0	45	0			60S ribosomal protein L10a
Q9JHI5	Ivd	74	0	38	0			Isovaleryl-CoA dehydrogenase, mitochondrial
Q8BP67	Rpl24	74	0	37	0			60S ribosomal protein L24
Q8K411	Pitrm1	74	0	30	0			Presequence protease, mitochondrial
Q03734	Serpina3m	73	0	100	0			Serine protease inhibitor A3M
P28656	Nap1l1	73	0	97	0			Nucleosome assembly protein 1-like 1
Q64152	Btf3	73	0	83	0			Transcription factor BTF3
Q8BG32	Psmd11	73	0	81	0			26S proteasome non-ATPase regulatory subunit 11
O70251	Eef1b	73	0	73	0			Elongation factor 1-beta
P33622	Apoc3	73	0	55	0			Apolipoprotein C-III
Q04750	Top1	73	0	43	0			DNA topoisomerase 1
Q9EQP2	Ehd4	73	0	36	0			EH domain-containing protein 4
Q9EP71	Rai14	73	0	32	0			Ankycorbin
Q9D7N9	Apmap	73	0	22	0			Adipocyte plasma membrane-associated protein
Q9Z1X4	Ilf3	72	0	115	0			Interleukin enhancer-binding factor 3
Q99KN9	Clint1	72	0	83	0			Clathrin interactor 1
P47753	Capza1	72	0	68	0			F-actin-capping protein subunit alpha-1
O88322	Nid2	72	0	68	0			Nidogen-2
Q9JIK5	Ddx21	72	0	58	0			Nucleolar RNA helicase 2
Q925B0	Pawr	72	0	58	0			PRKC apoptosis WT1 regulator protein
Q5XJY5	Arcn1	72	0	57	0			Coatomer subunit delta
Q8BSY0	Asph	72	0	54	0			Aspartyl/asparaginyl beta-hydroxylase
Q62446	Fkbp3	72	0	52	0			Peptidyl-prolyl cis-trans isomerase FKBP3
Q6P542	Abcf1	72	0	51	0			ATP-binding cassette sub-family F member 1
Q9WUB3	Pygm	72	0	45	0			Glycogen phosphorylase, muscle form
O54931	Akap2	72	0	33	0			A-kinase anchor protein 2
Q9JHJ0	Tmod3	72	0	30	0			Tropomodulin-3
O35465	Fkbp8	72	0	24	0			Peptidyl-prolyl cis-trans isomerase FKBP8
Q6PB44	Ptpn23	72	0	22	0			Tyrosine-protein phosphatase non-receptor type 23
P28474	Adh5	71	0	127	0			Alcohol dehydrogenase class-3
Q91VR5	Ddx1	71	0	114	0			ATP-dependent RNA helicase DDX1
P99026	Psmb4	71	0	64	0			Proteasome subunit beta type-4
Q01405	Sec23a	71	0	60	0			Protein transport protein Sec23A
Q9JLI8	Sart3	71	0	49	0			Squamous cell carcinoma antigen recognized by T-cells 3
Q8BRF7	Scfd1	71	0	37	0			Sec1 family domain-containing protein 1
P32067	Ssb	71	0	30	0			Lupus La protein homolog
Q60634	Flot2	71	0	23	0			Flotillin-2
Q61009	Scarb1	71	0	0	0			Scavenger receptor class B member 1
Q9CQ19	Myl9	70	0	376	0			Myosin regulatory light polypeptide 9
P10493	Nid1	70	0	160	0			Nidogen-1
P01868	Ighg1	70	0	125	0			Ig gamma-1 chain C region secreted form
P01869	Ighg1	70	0	125	0			Ig gamma-1 chain C region, membrane-bound form
P11103	Parp1	70	0	96	0			Poly [ADP-ribose] polymerase 1
Q6PDM2	Srsf1	70	0	82	0			Serine/arginine-rich splicing factor 1
O70194	Eif3d	70	0	70	0			Eukaryotic translation initiation factor 3 subunit D
P84104	Srsf3	70	0	65	0			Serine/arginine-rich splicing factor 3
Q6P5F9	Xpo1	70	0	53	0			Exportin-1
Q922Q8	Lrrc59	70	0	47	0			Leucine-rich repeat-containing protein 59
P63085	Mapk1	70	0	35	0			Mitogen-activated protein kinase 1
P53994	Rab2a	70	0	29	0			Ras-related protein Rab-2A
Q9DBP5	Cmpk1	70	0	11	0			UMP-CMP kinase
P06151	Ldha	69	0	236	0			L-lactate dehydrogenase A chain
Q9D0K2	Oxct1	69	0	148	0			Succinyl-CoA:3-ketoacid coenzyme A transferase 1, mitochondrial
P24527	Lta4h	69	0	137	0			Leukotriene A-4 hydrolase
P62334	Psmc6	69	0	92	0			26S protease regulatory subunit 10B
O55222	Ilk	69	0	88	0			Integrin-linked protein kinase
P62751	Rpl23a	69	0	71	0			60S ribosomal protein L23a
Q9CYZ2	Tpd52l2	69	0	65	0			Tumor protein D54
Q9Z1F9	Uba2	69	0	52	0			SUMO-activating enzyme subunit 2
Q9EP69	Sacm1l	69	0	47	0			Phosphatidylinositide phosphatase SAC1
Q9CR57	Rpl14	69	0	45	0			60S ribosomal protein L14
Q61792	Lasp1	69	0	40	0			LIM and SH3 domain protein 1
Q9JHR7	Ide	69	0	16	0			Insulin-degrading enzyme
P08752	Gnai2	68	0	79	0			Guanine nucleotide-binding protein G(i) subunit alpha-2
O08756	Hsd17b10	68	0	58	0			3-hydroxyacyl-CoA dehydrogenase type-2
O70250	Pgam2	68	0	51	0			Phosphoglycerate mutase 2
O08585	Clta	68	0	49	0			Clathrin light chain A
Q9Z2W0	Dnpep	68	0	48	0			Aspartyl aminopeptidase
Q8BWY3	Etf1	68	0	47	0			Eukaryotic peptide chain release factor subunit 1
Q8BJY1	Psmd5	68	0	35	0			26S proteasome non-ATPase regulatory subunit 5
P97372	Psme2	68	0	33	0			Proteasome activator complex subunit 2
Q8QZS1	Hibch	68	0	28	0			3-hydroxyisobutyryl-CoA hydrolase, mitochondrial
O88738	Birc6	68	0	28	0			Baculoviral IAP repeat-containing protein 6
P62492	Rab11a	68	0	25	0			Ras-related protein Rab-11A
Q62426	Cstb	68	0	24	0			Cystatin-B
Q80XU3	Nucks1	68	0	5	0			Nuclear ubiquitous casein and cyclin-dependent kinase substrate 1
Q91WR5	Akr1c21	68	0	0	0			Aldo-keto reductase family 1 member C21
Q61074	Ppm1g	67	0	78	0			Protein phosphatase 1G
Q99KK7	Dpp3	67	0	74	0			Dipeptidyl peptidase 3
Q9CPY7	Lap3	67	0	70	0			Cytosol aminopeptidase
P70349	Hint1	67	0	67	0			Histidine triad nucleotide-binding protein 1
Q9CXW4	Rpl11	67	0	53	0			60S ribosomal protein L11
Q8BMJ2	Lars	67	0	46	0			Leucine--tRNA ligase, cytoplasmic
Q6ZWV7	Rpl35	67	0	42	0			60S ribosomal protein L35
Q9JJW6	Alyref2	67	0	42	0			Aly/REF export factor 2
O35551	Rabep1	67	0	24	0			Rab GTPase-binding effector protein 1
Q8VI64	Mgarp	67	0	3	0			Protein MGARP
P62880	Gnb2	66	0	181	0			Guanine nucleotide-binding protein G(I)/G(S)/G(T) subunit beta-2
P62962	Pfn1	66	0	177	0			Profilin-1
Q923D2	Blvrb	66	0	116	0			Flavin reductase (NADPH)
P61089	Ube2n	66	0	112	0			Ubiquitin-conjugating enzyme E2 N
P09041	Pgk2	66	0	75	0			Phosphoglycerate kinase 2
Q569Z6	Thrap3	66	0	65	0			Thyroid hormone receptor-associated protein 3
Q9CX86	Hnrnpa0	66	0	63	0			Heterogeneous nuclear ribonucleoprotein A0
Q9QYR9	Acot2	66	0	58	0			Acyl-coenzyme A thioesterase 2, mitochondrial
Q99JI6	Rap1b	66	0	58	0			Ras-related protein Rap-1b
Q61584	Fxr1	66	0	54	0			Fragile X mental retardation syndrome-related protein 1
P70441	Slc9a3r1	66	0	52	0			Na(+)/H(+) exchange regulatory cofactor NHE-RF1
P56395	Cyb5a	66	0	39	0			Cytochrome b5
Q6DIC0	Smarca2	66	0	33	0			Probable global transcription activator SNF2L2
Q9CQC6	Bzw1	66	0	27	0			Basic leucine zipper and W2 domain-containing protein 1
Q6Y685	Tacc1	66	0	12	0			Transforming acidic coiled-coil-containing protein 1
Q8VHX6	Flnc	65	0	369	0			Filamin-C
Q60973	Rbbp7	65	0	82	0			Histone-binding protein RBBP7
Q9QZD9	Eif3i	65	0	70	0			Eukaryotic translation initiation factor 3 subunit I
Q9DBG3	Ap2b1	65	0	58	0			AP-2 complex subunit beta
P10711	Tcea1	65	0	57	0			Transcription elongation factor A protein 1
Q00915	Rbp1	65	0	54	0			Retinol-binding protein 1
Q61191	Hcfc1	65	0	52	0			Host cell factor 1
Q8R5J9	Arl6ip5	65	0	46	0			PRA1 family protein 3
Q8R1G2	Cmbl	65	0	16	0			Carboxymethylenebutenolidase homolog
P28653	Bgn	64	0	91	0			Biglycan
Q61595	Ktn1	64	0	86	0			Kinectin
Q6A068	Cdc5l	64	0	78	0			Cell division cycle 5-like protein
P97822	Anp32e	64	0	74	0			Acidic leucine-rich nuclear phosphoprotein 32 family member E
Q9CWK8	Snx2	64	0	56	0			Sorting nexin-2
Q9Z1Q9	Vars	64	0	52	0			Valine--tRNA ligase
Q8BTI8	Srrm2	64	0	44	0			Serine/arginine repetitive matrix protein 2
Q925I1	Atad3	64	0	43	0			ATPase family AAA domain-containing protein 3
Q9WVE8	Pacsin2	64	0	27	0			Protein kinase C and casein kinase substrate in neurons protein 2
Q9QZ23	Nfu1	64	0	18	0			NFU1 iron-sulfur cluster scaffold homolog, mitochondrial
Q00897	Serpina1d	63	0	188	0			Alpha-1-antitrypsin 1-4
Q3U7R1	Esyt1	63	0	172	0			Extended synaptotagmin-1
Q9WV27	Atp1a4	63	0	90	0			Sodium/potassium-transporting ATPase subunit alpha-4
P83917	Cbx1	63	0	76	0			Chromobox protein homolog 1
Q569Z5	Ddx46	63	0	65	0			Probable ATP-dependent RNA helicase DDX46
A2AGT5	Ckap5	63	0	63	0			Cytoskeleton-associated protein 5
Q63844	Mapk3	63	0	53	0			Mitogen-activated protein kinase 3
P50518	Atp6v1e1	63	0	48	0			V-type proton ATPase subunit E 1
Q7TT50	Cdc42bpb	63	0	37	0			Serine/threonine-protein kinase MRCK beta
O08547	Sec22b	63	0	35	0			Vesicle-trafficking protein SEC22b
Q64511	Top2b	63	0	33	0			DNA topoisomerase 2-beta
Q3TC72	Fahd2	63	0	20	0			Fumarylacetoacetate hydrolase domain-containing protein 2A
P26149	Hsd3b2	63	0	0	0			3 beta-hydroxysteroid dehydrogenase/Delta 5-- 4-isomerase type 2
P07091	S100a4	63	0	0	0			Protein S100-A4
Q61554	Fbn1	62	0	215	0			Fibrillin-1
P51885	Lum	62	0	203	0			Lumican
Q91VD9	Ndufs1	62	0	125	0			NADH-ubiquinone oxidoreductase 75 kDa subunit, mitochondrial
P35979	Rpl12	62	0	107	0			60S ribosomal protein L12
P97434	Mprip	62	0	90	0			Myosin phosphatase Rho-interacting protein
Q80X50	Ubap2l	62	0	90	0			Ubiquitin-associated protein 2-like
P58871	Tnks1bp1	62	0	85	0			182 kDa tankyrase-1-binding protein
P34884	Mif	62	0	61	0			Macrophage migration inhibitory factor
Q3U1J4	Ddb1	62	0	59	0			DNA damage-binding protein 1
P43406	Itgav	62	0	57	0			Integrin alpha-V
Q9JIX8	Acin1	62	0	56	0			Apoptotic chromatin condensation inducer in the nucleus
Q8CG76	Akr7a2	62	0	28	0			Aflatoxin B1 aldehyde reductase member 2
P59325	Eif5	62	0	27	0			Eukaryotic translation initiation factor 5
Q99LP6	Grpel1	62	0	26	0			GrpE protein homolog 1, mitochondrial
Q9WUR2	Eci2	62	0	20	0			Enoyl-CoA delta isomerase 2, mitochondrial
P47915	Rpl29	62	0	19	0			60S ribosomal protein L29
Q9D5T0	Atad1	62	0	16	0			ATPase family AAA domain-containing protein 1
P35278	Rab5c	62	0	14	0			Ras-related protein Rab-5C
Q8BGH2	Samm50	62	0	6	0			Sorting and assembly machinery component 50 homolog
P20239	Zp2	62	0	0	0			Zona pellucida sperm-binding protein 2
P62843	Rps15	61	0	73	0			40S ribosomal protein S15
P51410	Rpl9	61	0	72	0			60S ribosomal protein L9
Q3TKT4	Smarca4	61	0	45	0			Transcription activator BRG1
Q9CPQ3	Tomm22	61	0	36	0			Mitochondrial import receptor subunit TOM22 homolog
Q05816	Fabp5	61	0	30	0			Fatty acid-binding protein, epidermal
Q8BVE3	Atp6v1h	61	0	21	0			V-type proton ATPase subunit H
Q9CQX8	Mrps36	61	0	6	0			28S ribosomal protein S36, mitochondrial
Q9D4J1	Efhd1	61	0	4	0			EF-hand domain-containing protein D1
Q91YH5	Atl3	60	0	96	0			Atlastin-3
Q8R429	Atp2a1	60	0	94	0			Sarcoplasmic/endoplasmic reticulum calcium ATPase 1
Q00612	G6pdx	60	0	75	0			Glucose-6-phosphate 1-dehydrogenase X
Q99KP6	Prpf19	60	0	72	0			Pre-mRNA-processing factor 19
P05201	Got1	60	0	58	0			Aspartate aminotransferase, cytoplasmic
Q7TSV4	Pgm2	60	0	57	0			Phosphoglucomutase-2
D3YZP9	Ccdc6	60	0	41	0			Coiled-coil domain-containing protein 6
Q91WK2	Eif3h	60	0	28	0			Eukaryotic translation initiation factor 3 subunit H
P48428	Tbca	60	0	28	0			Tubulin-specific chaperone A
P41105	Rpl28	60	0	18	0			60S ribosomal protein L28
Q8R311	Ctage5	60	0	18	0			cTAGE family member 5
Q9CPQ8	Atp5l	60	0	14	0			ATP synthase subunit g, mitochondrial
Q8BH64	Ehd2	59	0	236	0			EH domain-containing protein 2
Q9Z1Z2	Strap	59	0	85	0			Serine-threonine kinase receptor-associated protein
Q9WV80	Snx1	59	0	57	0			Sorting nexin-1
Q6PDG5	Smarcc2	59	0	56	0			SWI/SNF complex subunit SMARCC2
O88456	Capns1	59	0	54	0			Calpain small subunit 1
P47740	Aldh3a2	59	0	50	0			Fatty aldehyde dehydrogenase
Q99KE1	Me2	59	0	35	0			NAD-dependent malic enzyme, mitochondrial
P19536	Cox5b	59	0	34	0			Cytochrome c oxidase subunit 5B, mitochondrial
Q64012	Raly	59	0	29	0			RNA-binding protein Raly
Q80UM7	Mogs	59	0	22	0			Mannosyl-oligosaccharide glucosidase
Q9R0H0	Acox1	59	0	21	0			Peroxisomal acyl-coenzyme A oxidase 1
Q99KQ4	Nampt	59	0	15	0			Nicotinamide phosphoribosyltransferase
Q9DBC7	Prkar1a	59	0	11	0			cAMP-dependent protein kinase type I-alpha regulatory subunit
P08228	Sod1	58	0	118	0			Superoxide dismutase [Cu-Zn]
P00329	Adh1	58	0	108	0			Alcohol dehydrogenase 1
P81117	Nucb2	58	0	82	0			Nucleobindin-2
Q7TNC4	Luc7l2	58	0	79	0			Putative RNA-binding protein Luc7-like 2
P10639	Txn	58	0	72	0			Thioredoxin
Q58A65	Spag9	58	0	71	0			C-Jun-amino-terminal kinase-interacting protein 4
P51150	Rab7a	58	0	70	0			Ras-related protein Rab-7a
P12367	Prkar2a	58	0	65	0			cAMP-dependent protein kinase type II-alpha regulatory subunit
Q61545	Ewsr1	58	0	57	0			RNA-binding protein EWS
P24452	Capg	58	0	53	0			Macrophage-capping protein
Q62383	Supt6h	58	0	51	0			Transcription elongation factor SPT6
P62858	Rps28	58	0	39	0			40S ribosomal protein S28
O54774	Ap3d1	58	0	39	0			AP-3 complex subunit delta-1
P15331	Prph	58	0	38	0			Peripherin
P49945	Ftl2	58	0	32	0			Ferritin light chain 2
Q64514	Tpp2	58	0	30	0			Tripeptidyl-peptidase 2
O08784	Tcof1	58	0	19	0			Treacle protein
Q9CR98	Fam136a	58	0	10	0			Protein FAM136A
Q99M71	Epdr1	58	0	0	0			Mammalian ependymin-related protein 1
Q9WVK4	Ehd1	57	0	106	0			EH domain-containing protein 1
Q99JF8	Psip1	57	0	74	0			PC4 and SFRS1-interacting protein
P60766	Cdc42	57	0	61	0			Cell division control protein 42 homolog
Q03173	Enah	57	0	49	0			Protein enabled homolog
O35226	Psmd4	57	0	39	0			26S proteasome non-ATPase regulatory subunit 4
Q9EPU0	Upf1	57	0	37	0			Regulator of nonsense transcripts 1
P70336	Rock2	57	0	36	0			Rho-associated protein kinase 2
O89086	Rbm3	57	0	35	0			Putative RNA-binding protein 3
O88746	Tom1	57	0	34	0			Target of Myb protein 1
P55096	Abcd3	57	0	24	0			ATP-binding cassette sub-family D member 3
Q9DC69	Ndufa9	57	0	22	0			NADH dehydrogenase [ubiquinone] 1 alpha subcomplex subunit 9, mitochondrial
Q99M87	Dnaja3	57	0	7	0			DnaJ homolog subfamily A member 3, mitochondrial
P97315	Csrp1	56	0	248	0			Cysteine and glycine-rich protein 1
Q9D051	Pdhb	56	0	136	0			Pyruvate dehydrogenase E1 component subunit beta, mitochondrial
Q6PHZ2	Camk2d	56	0	106	0			Calcium/calmodulin-dependent protein kinase type II subunit delta
Q8BKC5	Ipo5	56	0	88	0			Importin-5
Q3UEB3	Puf60	56	0	83	0			Poly(U)-binding-splicing factor PUF60
P35550	Fbl	56	0	67	0			rRNA 2&#039;-O-methyltransferase fibrillarin
Q9CR68	Uqcrfs1	56	0	41	0			Cytochrome b-c1 complex subunit Rieske, mitochondrial
Q80YR5	Safb2	56	0	41	0			Scaffold attachment factor B2
Q6P8X1	Snx6	56	0	41	0			Sorting nexin-6
P62821	Rab1A	56	0	34	0			Ras-related protein Rab-1A
Q6R891	Ppp1r9b	56	0	19	0			Neurabin-2
Q9R0A0	Pex14	56	0	15	0			Peroxisomal membrane protein PEX14
P10518	Alad	55	0	148	0			Delta-aminolevulinic acid dehydratase
P26369	U2af2	55	0	106	0			Splicing factor U2AF 65 kDa subunit
Q640N1	Aebp1	55	0	62	0			Adipocyte enhancer-binding protein 1
O08997	Atox1	55	0	62	0			Copper transport protein ATOX1
Q8BFY9	Tnpo1	55	0	61	0			Transportin-1
Q8R317	Ubqln1	55	0	58	0			Ubiquilin-1
Q61655	Ddx19a	55	0	50	0			ATP-dependent RNA helicase DDX19A
P62267	Rps23	55	0	47	0			40S ribosomal protein S23
Q8VD75	Hip1	55	0	44	0			Huntingtin-interacting protein 1
Q8R164	Bphl	55	0	37	0			Valacyclovir hydrolase
P70398	Usp9x	55	0	36	0			Probable ubiquitin carboxyl-terminal hydrolase FAF-X
Q8BLF1	Nceh1	55	0	35	0			Neutral cholesterol ester hydrolase 1
Q9CR62	Slc25a11	55	0	34	0			Mitochondrial 2-oxoglutarate/malate carrier protein
P14576	Srp54	55	0	33	0			Signal recognition particle 54 kDa protein
Q9ERG0	Lima1	55	0	30	0			LIM domain and actin-binding protein 1
P62717	Rpl18a	55	0	28	0			60S ribosomal protein L18a
Q8BWF0	Aldh5a1	55	0	16	0			Succinate-semialdehyde dehydrogenase, mitochondrial
Q921T2	Tor1aip1	55	0	16	0			Torsin-1A-interacting protein 1
Q9Z2G6	Sel1l	55	0	13	0			Protein sel-1 homolog 1
P16110	Lgals3	55	0	0	0			Galectin-3
O08677	Kng1	54	0	154	0			Kininogen-1
Q9DAW9	Cnn3	54	0	104	0			Calponin-3
Q9JKB3	Ybx3	54	0	75	0			Y-box-binding protein 3
P42227	Stat3	54	0	62	0			Signal transducer and activator of transcription 3
P19639	Gstm3	54	0	60	0			Glutathione S-transferase Mu 3
Q99JI4	Psmd6	54	0	59	0			26S proteasome non-ATPase regulatory subunit 6
Q8CGN5	Plin1	54	0	54	0			Perilipin-1
Q99KF1	Tmed9	54	0	51	0			Transmembrane emp24 domain-containing protein 9
P51174	Acadl	54	0	43	0			Long-chain specific acyl-CoA dehydrogenase, mitochondrial
Q9R1T2	Sae1	54	0	41	0			SUMO-activating enzyme subunit 1
Q9D5V6	Syap1	54	0	41	0			Synapse-associated protein 1
Q9CZM2	Rpl15	54	0	40	0			60S ribosomal protein L15
Q8BVI4	Qdpr	54	0	35	0			Dihydropteridine reductase
O35350	Capn1	54	0	29	0			Calpain-1 catalytic subunit
Q8K354	Cbr3	54	0	29	0			Carbonyl reductase [NADPH] 3
Q6PGL7	Fam21	54	0	27	0			WASH complex subunit FAM21
Q811D0	Dlg1	54	0	26	0			Disks large homolog 1
P08207	S100a10	54	0	24	0			Protein S100-A10
Q9JLQ0	Cd2ap	54	0	15	0			CD2-associated protein
Q8JZK9	Hmgcs1	54	0	8	0			Hydroxymethylglutaryl-CoA synthase, cytoplasmic
Q9R049	Amfr	54	0	3	0			E3 ubiquitin-protein ligase AMFR
O35685	Nudc	53	0	99	0			Nuclear migration protein nudC
P00405	Mtco2	53	0	72	0			Cytochrome c oxidase subunit 2
Q05D44	Eif5b	53	0	56	0			Eukaryotic translation initiation factor 5B
P62835	Rap1a	53	0	53	0			Ras-related protein Rap-1A
P11881	Itpr1	53	0	52	0			Inositol 1,4,5-trisphosphate receptor type 1
Q9D0J8	Ptms	53	0	44	0			Parathymosin
Q8BL97	Srsf7	53	0	41	0			Serine/arginine-rich splicing factor 7
Q4VAA2	Cdv3	53	0	37	0			Protein CDV3
Q8CCS6	Pabpn1	53	0	35	0			Polyadenylate-binding protein 2
P55302	Lrpap1	53	0	34	0			Alpha-2-macroglobulin receptor-associated protein
Q8CHT0	Aldh4a1	53	0	30	0			Delta-1-pyrroline-5-carboxylate dehydrogenase, mitochondrial
P35505	Fah	53	0	27	0			Fumarylacetoacetase
Q8C129	Lnpep	53	0	12	0			Leucyl-cystinyl aminopeptidase
Q8BGC4	Zadh2	53	0	12	0			Zinc-binding alcohol dehydrogenase domain-containing protein 2
Q62523	Zyx	52	0	159	0			Zyxin
Q9WTM5	Ruvbl2	52	0	86	0			RuvB-like 2
O35639	Anxa3	52	0	68	0			Annexin A3
P62264	Rps14	52	0	65	0			40S ribosomal protein S14
P17918	Pcna	52	0	62	0			Proliferating cell nuclear antigen
P17427	Ap2a2	52	0	48	0			AP-2 complex subunit alpha-2
Q60817	Naca	52	0	45	0			Nascent polypeptide-associated complex subunit alpha
P70670	Naca	52	0	45	0			Nascent polypeptide-associated complex subunit alpha, muscle-specific form
O35593	Psmd14	52	0	43	0			26S proteasome non-ATPase regulatory subunit 14
O08663	Metap2	52	0	41	0			Methionine aminopeptidase 2
O55201	Supt5h	52	0	40	0			Transcription elongation factor SPT5
P09528	Fth1	52	0	38	0			Ferritin heavy chain
P10833	Rras	52	0	36	0			Ras-related protein R-Ras
Q62093	Srsf2	52	0	35	0			Serine/arginine-rich splicing factor 2
Q60737	Csnk2a1	52	0	34	0			Casein kinase II subunit alpha
P51855	Gss	52	0	29	0			Glutathione synthetase
Q9R190	Mta2	52	0	29	0			Metastasis-associated protein MTA2
Q3UMU9	Hdgfrp2	52	0	28	0			Hepatoma-derived growth factor-related protein 2
Q9D8U8	Snx5	52	0	25	0			Sorting nexin-5
P60867	Rps20	52	0	21	0			40S ribosomal protein S20
Q61249	Igbp1	52	0	21	0			Immunoglobulin-binding protein 1
Q3UIA2	Arhgap17	52	0	18	0			Rho GTPase-activating protein 17
Q8C6K9	Col6a6	51	0	76	0			Collagen alpha-6(VI) chain
Q61207	Psap	51	0	65	0			Sulfated glycoprotein 1
Q8C0C7	Farsa	51	0	59	0			Phenylalanine--tRNA ligase alpha subunit
Q91YR1	Twf1	51	0	56	0			Twinfilin-1
Q8BH69	Sephs1	51	0	51	0			Selenide, water dikinase 1
Q8CGF7	Tcerg1	51	0	50	0			Transcription elongation regulator 1
P01897	H2-L	51	0	43	0			H-2 class I histocompatibility antigen, L-D alpha chain
Q9QXT0	Cnpy2	51	0	39	0			Protein canopy homolog 2
Q7TNP2	Ppp2r1b	51	0	35	0			Serine/threonine-protein phosphatase 2A 65 kDa regulatory subunit A beta isoform
Q8VBV7	Cops8	51	0	34	0			COP9 signalosome complex subunit 8
O55023	Impa1	51	0	33	0			Inositol monophosphatase 1
Q7TQI3	Otub1	51	0	31	0			Ubiquitin thioesterase OTUB1
Q6ZPJ3	Ube2o	51	0	29	0			Ubiquitin-conjugating enzyme E2 O
Q9WUA2	Farsb	51	0	27	0			Phenylalanine--tRNA ligase beta subunit
Q9QYJ0	Dnaja2	51	0	23	0			DnaJ homolog subfamily A member 2
Q8R016	Blmh	51	0	18	0			Bleomycin hydrolase
O09012	Pex5	51	0	6	0			Peroxisomal targeting signal 1 receptor
O70311	Nmt2	51	0	0	0			Glycylpeptide N-tetradecanoyltransferase 2
P09055	Itgb1	50	0	160	0			Integrin beta-1
P12382	Pfkl	50	0	130	0			6-phosphofructokinase, liver type
P50580	Pa2g4	50	0	99	0			Proliferation-associated protein 2G4
Q9Z0E6	Gbp2	50	0	64	0			Interferon-induced guanylate-binding protein 2
Q3THK7	Gmps	50	0	63	0			GMP synthase [glutamine-hydrolyzing]
O70435	Psma3	50	0	63	0			Proteasome subunit alpha type-3
Q9WUM4	Coro1c	50	0	57	0			Coronin-1C
P34022	Ranbp1	50	0	50	0			Ran-specific GTPase-activating protein
Q9D024	Ccdc47	50	0	24	0			Coiled-coil domain-containing protein 47
P19783	Cox4i1	50	0	20	0			Cytochrome c oxidase subunit 4 isoform 1, mitochondrial
Q6GQT9	Nomo1	50	0	16	0			Nodal modulator 1
Q9D1Q6	Erp44	50	0	12	0			Endoplasmic reticulum resident protein 44
Q8K2C7	Os9	50	0	11	0			Protein -9
P56382	Atp5e	50	0	0	0			ATP synthase subunit epsilon, mitochondrial
Q00898	Serpina1e	49	0	151	0			Alpha-1-antitrypsin 1-5
Q91ZJ5	Ugp2	49	0	72	0			UTP--glucose-1-phosphate uridylyltransferase
Q8C1A5	Thop1	49	0	58	0			Thimet oligopeptidase
P35486	Pdha1	49	0	56	0			Pyruvate dehydrogenase E1 component subunit alpha, somatic form, mitochondrial
P70195	Psmb7	49	0	48	0			Proteasome subunit beta type-7
Q8K3H0	Appl1	49	0	45	0			DCC-interacting protein 13-alpha
P97461	Rps5	49	0	38	0			40S ribosomal protein S5
P57722	Pcbp3	49	0	37	0			Poly(rC)-binding protein 3
Q9CZ42	Carkd	49	0	36	0			ATP-dependent (S)-NAD(P)H-hydrate dehydratase
Q63932	Map2k2	49	0	35	0			Dual specificity mitogen-activated protein kinase kinase 2
O88531	Ppt1	49	0	25	0			Palmitoyl-protein thioesterase 1
O70503	Hsd17b12	49	0	23	0			Estradiol 17-beta-dehydrogenase 12
Q6P9Q6	Fkbp15	49	0	23	0			FK506-binding protein 15
P61358	Rpl27	49	0	22	0			60S ribosomal protein L27
Q9CWE0	Mtfr1l	49	0	11	0			Mitochondrial fission regulator 1-like
Q8R0X7	Sgpl1	49	0	10	0			Sphingosine-1-phosphate lyase 1
Q61263	Soat1	49	0	0	0			Sterol O-acyltransferase 1
Q61001	Lama5	48	0	241	0			Laminin subunit alpha-5
P17563	Selenbp1	48	0	153	0			Selenium-binding protein 1
Q91X72	Hpx	48	0	99	0			Hemopexin
P60122	Ruvbl1	48	0	90	0			RuvB-like 1
Q3UTJ2	Sorbs2	48	0	60	0			Sorbin and SH3 domain-containing protein 2
P26516	Psmd7	48	0	42	0			26S proteasome non-ATPase regulatory subunit 7
P55937	Golga3	48	0	37	0			Golgin subfamily A member 3
Q6ZQI3	Mlec	48	0	35	0			Malectin
P19253	Rpl13a	48	0	31	0			60S ribosomal protein L13a
Q9DB15	Mrpl12	48	0	28	0			39S ribosomal protein L12, mitochondrial
P63323	Rps12	48	0	24	0			40S ribosomal protein S12
Q99MN1	Kars	48	0	24	0			Lysine--tRNA ligase
Q8CI59	Steap3	48	0	23	0			Metalloreductase STEAP3
Q9D6Y9	Gbe1	48	0	21	0			1,4-alpha-glucan-branching enzyme
Q3THG9	Aarsd1	48	0	20	0			Alanyl-tRNA editing protein Aarsd1
O54984	Asna1	48	0	20	0			ATPase Asna1
P43883	Plin2	48	0	0	0			Perilipin-2
Q99K51	Pls3	47	0	147	0			Plastin-3
Q61703	Itih2	47	0	97	0			Inter-alpha-trypsin inhibitor heavy chain H2
Q60972	Rbbp4	47	0	68	0			Histone-binding protein RBBP4
Q60749	Khdrbs1	47	0	62	0			KH domain-containing, RNA-binding, signal transduction-associated protein 1
O89023	Tpp1	47	0	61	0			Tripeptidyl-peptidase 1
Q99P88	Nup155	47	0	56	0			Nuclear pore complex protein Nup155
Q9JJU8	Sh3bgrl	47	0	52	0			SH3 domain-binding glutamic acid-rich-like protein
Q8VDW0	Ddx39a	47	0	45	0			ATP-dependent RNA helicase DDX39A
Q3ULJ0	Gpd1l	47	0	29	0			Glycerol-3-phosphate dehydrogenase 1-like protein
Q8R1Q8	Dync1li1	47	0	28	0			Cytoplasmic dynein 1 light intermediate chain 1
Q8K3C3	Lzic	47	0	25	0			Protein LZIC
Q9DCB1	Hmgn3	47	0	15	0			High mobility group nucleosome-binding domain-containing protein 3
Q9Z1J3	Nfs1	47	0	7	0			Cysteine desulfurase, mitochondrial
Q9CQD1	Rab5a	47	0	0	0			Ras-related protein Rab-5A
Q01730	Rsu1	46	0	90	0			Ras suppressor protein 1
Q9QUI0	Rhoa	46	0	63	0			Transforming protein RhoA
Q9QUM9	Psma6	46	0	62	0			Proteasome subunit alpha type-6
Q9CXI5	Manf	46	0	54	0			Mesencephalic astrocyte-derived neurotrophic factor
P68037	Ube2l3	46	0	51	0			Ubiquitin-conjugating enzyme E2 L3
Q99JX3	Gorasp2	46	0	49	0			Golgi reassembly-stacking protein 2
Q91WQ3	Yars	46	0	47	0			Tyrosine--tRNA ligase, cytoplasmic
P47857	Pfkm	46	0	46	0			6-phosphofructokinase, muscle type
Q9JMA1	Usp14	46	0	38	0			Ubiquitin carboxyl-terminal hydrolase 14
B2RXS4	Plxnb2	46	0	37	0			Plexin-B2
Q80UM3	Naa15	46	0	35	0			N-alpha-acetyltransferase 15, NatA auxiliary subunit
Q91YR7	Prpf6	46	0	32	0			Pre-mRNA-processing factor 6
Q9DB05	Napa	46	0	30	0			Alpha-soluble NSF attachment protein
Q07076	Anxa7	46	0	26	0			Annexin A7
Q9D967	Mdp1	46	0	26	0			Magnesium-dependent phosphatase 1
Q9WV54	Asah1	46	0	15	0			Acid ceramidase
Q91VH2	Snx9	46	0	15	0			Sorting nexin-9
Q64310	Surf4	46	0	13	0			Surfeit locus protein 4
Q0P678	Zc3h18	46	0	8	0			Zinc finger CCCH domain-containing protein 18
Q04997	Inha	46	0	6	0			Inhibin alpha chain
Q91WS0	Cisd1	46	0	5	0			CDGSH iron-sulfur domain-containing protein 1
P27046	Man2a1	46	0	3	0			Alpha-mannosidase 2
O88398	Avil	46	0	0	0			Advillin
Q91VS7	Mgst1	46	0	0	0			Microsomal glutathione S-transferase 1
O70423	Aoc3	45	0	231	0			Membrane primary amine oxidase
P97927	Lama4	45	0	188	0			Laminin subunit alpha-4
Q9D0I9	Rars	45	0	80	0			Arginine--tRNA ligase, cytoplasmic
Q9JK53	Prelp	45	0	65	0			Prolargin
Q3TLH4	Prrc2c	45	0	51	0			Protein PRRC2C
P63001	Rac1	45	0	49	0			Ras-related C3 botulinum toxin substrate 1
Q9DAR7	Dcps	45	0	45	0			m7GpppX diphosphatase
O88544	Cops4	45	0	43	0			COP9 signalosome complex subunit 4
Q923D5	Wbp11	45	0	42	0			WW domain-binding protein 11
Q8BIQ5	Cstf2	45	0	37	0			Cleavage stimulation factor subunit 2
Q60902	Eps15l1	45	0	31	0			Epidermal growth factor receptor substrate 15-like 1
Q9CQI3	Gmfb	45	0	20	0			Glia maturation factor beta
Q6P1F6	Ppp2r2a	45	0	17	0			Serine/threonine-protein phosphatase 2A 55 kDa regulatory subunit B alpha isoform
Q80W54	Zmpste24	45	0	16	0			CAAX prenyl protease 1 homolog
Q8VBT0	Tmx1	45	0	16	0			Thioredoxin-related transmembrane protein 1
Q99J99	Mpst	45	0	4	0			3-mercaptopyruvate sulfurtransferase
Q8K0C4	Cyp51a1	45	0	0	0			Lanosterol 14-alpha demethylase
P35951	Ldlr	45	0	0	0			Low-density lipoprotein receptor
P28654	Dcn	44	0	182	0			Decorin
Q9WTQ5	Akap12	44	0	171	0			A-kinase anchor protein 12
P47757	Capzb	44	0	97	0			F-actin-capping protein subunit beta
Q8CIN4	Pak2	44	0	68	0			Serine/threonine-protein kinase PAK 2
P11087	Col1a1	44	0	66	0			Collagen alpha-1(I) chain
P25444	Rps2	44	0	61	0			40S ribosomal protein S2
Q3UM45	Ppp1r7	44	0	61	0			Protein phosphatase 1 regulatory subunit 7
Q9R0P4	Smap	44	0	58	0			Small acidic protein
P29595	Nedd8	44	0	44	0			NEDD8
P63321	Rala	44	0	32	0			Ras-related protein Ral-A
Q6A026	Pds5a	44	0	27	0			Sister chromatid cohesion protein PDS5 homolog A
Q2TPA8	Hsdl2	44	0	24	0			Hydroxysteroid dehydrogenase-like protein 2
Q5SW19	Cluh	44	0	17	0			Clustered mitochondria protein homolog
Q9CXT8	Pmpcb	44	0	15	0			Mitochondrial-processing peptidase subunit beta
P59017	Bcl2l13	44	0	12	0			Bcl-2-like protein 13
P62500	Tsc22d1	44	0	11	0			TSC22 domain family protein 1
Q9DB60	Fam213b	44	0	7	0			Prostamide/prostaglandin F synthase
P58044	Idi1	44	0	0	0			Isopentenyl-diphosphate Delta-isomerase 1
Q8BYI6	Lpcat2	44	0	0	0			Lysophosphatidylcholine acyltransferase 2
Q9JLV1	Bag3	43	0	63	0			BAG family molecular chaperone regulator 3
Q3UJB9	Edc4	43	0	59	0			Enhancer of mRNA-decapping protein 4
Q8BH97	Rcn3	43	0	57	0			Reticulocalbin-3
Q9Z1D1	Eif3g	43	0	56	0			Eukaryotic translation initiation factor 3 subunit G
P70404	Idh3g	43	0	38	0			Isocitrate dehydrogenase [NAD] subunit gamma 1, mitochondrial
P54822	Adsl	43	0	34	0			Adenylosuccinate lyase
Q9JIG7	Ccdc22	43	0	34	0			Coiled-coil domain-containing protein 22
Q9QYE6	Golga5	43	0	33	0			Golgin subfamily A member 5
Q8CHP8	Pgp	43	0	33	0			Phosphoglycolate phosphatase
P60229	Eif3e	43	0	32	0			Eukaryotic translation initiation factor 3 subunit E
Q921F4	Hnrnpll	43	0	26	0			Heterogeneous nuclear ribonucleoprotein L-like
Q9DCL9	Paics	43	0	24	0			Multifunctional protein ADE2
Q9JIW9	Ralb	43	0	23	0			Ras-related protein Ral-B
Q60714	Slc27a1	43	0	21	0			Long-chain fatty acid transport protein 1
Q7TNV0	Dek	43	0	21	0			Protein DEK
Q9CX80	Cygb	43	0	11	0			Cytoglobin
P70694	Akr1c6	43	0	0	0			Estradiol 17 beta-dehydrogenase 5
P17183	Eno2	42	0	191	0			Gamma-enolase
O35841	Api5	42	0	75	0			Apoptosis inhibitor 5
O35643	Ap1b1	42	0	71	0			AP-1 complex subunit beta-1
Q9WUK2	Eif4h	42	0	66	0			Eukaryotic translation initiation factor 4H
Q8VH51	Rbm39	42	0	56	0			RNA-binding protein 39
Q62376	Snrnp70	42	0	51	0			U1 small nuclear ribonucleoprotein 70 kDa
Q9D662	Sec23b	42	0	50	0			Protein transport protein Sec23B
P61957	Sumo2	42	0	47	0			Small ubiquitin-related modifier 2
Q9CPW4	Arpc5	42	0	44	0			Actin-related protein 2/3 complex subunit 5
P31230	Aimp1	42	0	43	0			Aminoacyl tRNA synthase complex-interacting multifunctional protein 1
P42567	Eps15	42	0	43	0			Epidermal growth factor receptor substrate 15
Q9ER00	Stx12	42	0	40	0			Syntaxin-12
Q9R0N0	Galk1	42	0	39	0			Galactokinase
Q3UHJ0	Aak1	42	0	38	0			AP2-associated protein kinase 1
Q61599	Arhgdib	42	0	34	0			Rho GDP-dissociation inhibitor 2
P47856	Gfpt1	42	0	31	0			Glutamine--fructose-6-phosphate aminotransferase [isomerizing] 1
Q9D1G1	Rab1b	42	0	30	0			Ras-related protein Rab-1B
Q8C854	Myef2	42	0	29	0			Myelin expression factor 2
P60670	Nploc4	42	0	29	0			Nuclear protein localization protein 4 homolog
Q62419	Sh3gl1	42	0	28	0			Endophilin-A2
Q1HFZ0	Nsun2	42	0	28	0			tRNA (cytosine(34)-C(5))-methyltransferase
Q8VE47	Uba5	42	0	28	0			Ubiquitin-like modifier-activating enzyme 5
Q9JIQ3	Diablo	42	0	18	0			Diablo homolog, mitochondrial
Q5U458	Dnajc11	42	0	12	0			DnaJ homolog subfamily C member 11
Q9D6S7	Mrrf	42	0	12	0			Ribosome-recycling factor, mitochondrial
P31428	Dpep1	42	0	9	0			Dipeptidase 1
Q6URW6	Myh14	41	0	278	0			Myosin-14
Q8R146	Apeh	41	0	64	0			Acylamino-acid-releasing enzyme
P61222	Abce1	41	0	55	0			ATP-binding cassette sub-family E member 1
Q64467	Gapdhs	41	0	51	0			Glyceraldehyde-3-phosphate dehydrogenase, testis-specific
Q8K019	Bclaf1	41	0	44	0			Bcl-2-associated transcription factor 1
Q64105	Spr	41	0	42	0			Sepiapterin reductase
Q9CR16	Ppid	41	0	40	0			Peptidyl-prolyl cis-trans isomerase D
Q9QX47	Son	41	0	36	0			Protein SON
Q99KP3	Cryl1	41	0	33	0			Lambda-crystallin homolog
Q9CQR2	Rps21	41	0	31	0			40S ribosomal protein S21
P62900	Rpl31	41	0	28	0			60S ribosomal protein L31
P84091	Ap2m1	41	0	28	0			AP-2 complex subunit mu
Q3UZ39	Lrrfip1	41	0	28	0			Leucine-rich repeat flightless-interacting protein 1
Q00519	Xdh	41	0	25	0			Xanthine dehydrogenase/oxidase
Q91XC8	Dap	41	0	16	0			Death-associated protein 1
Q8R1A4	Dock7	41	0	16	0			Dedicator of cytokinesis protein 7
Q8VE70	Pdcd10	41	0	15	0			Programmed cell death protein 10
P61027	Rab10	41	0	12	0			Ras-related protein Rab-10
Q9CQJ6	Denr	41	0	8	0			Density-regulated protein
P21550	Eno3	40	0	178	0			Beta-enolase
Q63836	Selenbp2	40	0	127	0			Selenium-binding protein 2
Q9JHU9	Isyna1	40	0	106	0			Inositol-3-phosphate synthase 1
Q8BP92	Rcn2	40	0	65	0			Reticulocalbin-2
P62774	Mtpn	40	0	51	0			Myotrophin
P63024	Vamp3	40	0	46	0			Vesicle-associated membrane protein 3
Q60872	Eif1a	40	0	38	0			Eukaryotic translation initiation factor 1A
Q8BMJ3	Eif1ax	40	0	37	0			Eukaryotic translation initiation factor 1A, X-chromosomal
P97379	G3bp2	40	0	37	0			Ras GTPase-activating protein-binding protein 2
O54879	Hmgb3	40	0	35	0			High mobility group protein B3
Q99L43	Cds2	40	0	29	0			Phosphatidate cytidylyltransferase 2
P08553	Nefm	40	0	28	0			Neurofilament medium polypeptide
Q9DBR1	Xrn2	40	0	26	0			5&#039;-3&#039; exoribonuclease 2
O35326	Srsf5	40	0	25	0			Serine/arginine-rich splicing factor 5
P46660	Ina	40	0	24	0			Alpha-internexin
Q8VCH8	Ubxn4	40	0	18	0			UBX domain-containing protein 4
Q6ZWY8	Tmsb10	40	0	13	0			Thymosin beta-10
O35855	Bcat2	40	0	6	0			Branched-chain-amino-acid aminotransferase, mitochondrial
P06342	H2-Ab1	40	0	6	0			H-2 class II histocompatibility antigen, A-Q beta chain
Q9EP75	Cyp4f14	40	0	0	0			Leukotriene-B4 omega-hydroxylase 3
Q8K3V4	Padi6	40	0	0	0			Protein-arginine deiminase type-6
Q64737	Gart	39	0	90	0			Trifunctional purine biosynthetic protein adenosine-3
Q923T9	Camk2g	39	0	69	0			Calcium/calmodulin-dependent protein kinase type II subunit gamma
Q8BGY2	Eif5a2	39	0	64	0			Eukaryotic translation initiation factor 5A-2
Q99K01	Pdxdc1	39	0	56	0			Pyridoxal-dependent decarboxylase domain-containing protein 1
P29788	Vtn	39	0	51	0			Vitronectin
Q9CQM9	Glrx3	39	0	49	0			Glutaredoxin-3
P97427	Crmp1	39	0	42	0			Dihydropyrimidinase-related protein 1
Q921M7	Fam49b	39	0	41	0			Protein FAM49B
P17426	Ap2a1	39	0	35	0			AP-2 complex subunit alpha-1
P55772	Entpd1	39	0	33	0			Ectonucleoside triphosphate diphosphohydrolase 1
Q8BXZ1	Tmx3	39	0	33	0			Protein disulfide-isomerase TMX3
P57784	Snrpa1	39	0	33	0			U2 small nuclear ribonucleoprotein A&#039;
Q9Z315	Sart1	39	0	31	0			U4/U6.U5 tri-snRNP-associated protein 1
Q3B7Z2	Osbp	39	0	28	0			Oxysterol-binding protein 1
Q8BQ47	Cnpy4	39	0	24	0			Protein canopy homolog 4
Q8VDQ1	Ptgr2	39	0	23	0			Prostaglandin reductase 2
Q8K4B0	Mta1	39	0	22	0			Metastasis-associated protein MTA1
Q99LD4	Gps1	39	0	21	0			COP9 signalosome complex subunit 1
P61211	Arl1	39	0	20	0			ADP-ribosylation factor-like protein 1
Q6NZC7	Sec23ip	39	0	20	0			SEC23-interacting protein
Q921M4	Golga2	39	0	16	0			Golgin subfamily A member 2
Q9CRD0	Ociad1	39	0	16	0			OCIA domain-containing protein 1
Q6P2K6	Smek1	39	0	11	0			Serine/threonine-protein phosphatase 4 regulatory subunit 3A
A2AQ25	Skt	39	0	9	0			Sickle tail protein
P15116	Cdh2	39	0	5	0			Cadherin-2
P50429	Arsb	39	0	4	0			Arylsulfatase B
Q3UHQ6	Dopey2	39	0	3	0			Protein dopey-2
Q9JI91	Actn2	38	0	153	0			Alpha-actinin-2
P04186	Cfb	38	0	80	0			Complement factor B
P46460	Nsf	38	0	72	0			Vesicle-fusing ATPase
Q9ET01	Pygl	38	0	71	0			Glycogen phosphorylase, liver form
Q8BX70	Vps13c	38	0	71	0			Vacuolar protein sorting-associated protein 13C
O35660	Gstm6	38	0	63	0			Glutathione S-transferase Mu 6
P31938	Map2k1	38	0	58	0			Dual specificity mitogen-activated protein kinase kinase 1
Q7M6Y3	Picalm	38	0	57	0			Phosphatidylinositol-binding clathrin assembly protein
P63044	Vamp2	38	0	50	0			Vesicle-associated membrane protein 2
P54823	Ddx6	38	0	47	0			Probable ATP-dependent RNA helicase DDX6
P29621	Serpina3c	38	0	46	0			Serine protease inhibitor A3C
P32921	Wars	38	0	45	0			Tryptophan--tRNA ligase, cytoplasmic
Q3ULD5	Mccc2	38	0	44	0			Methylcrotonoyl-CoA carboxylase beta chain, mitochondrial
Q91WP6	Serpina3n	38	0	44	0			Serine protease inhibitor A3N
A2BH40	Arid1a	38	0	43	0			AT-rich interactive domain-containing protein 1A
Q99KH8	Stk24	38	0	42	0			Serine/threonine-protein kinase 24
Q810B6	Ankfy1	38	0	35	0			Ankyrin repeat and FYVE domain-containing protein 1
Q9WV32	Arpc1b	38	0	34	0			Actin-related protein 2/3 complex subunit 1B
Q9CZR2	Naalad2	38	0	34	0			N-acetylated-alpha-linked acidic dipeptidase 2
Q9CQE8	2	38	0	33	0			UPF0568 protein C14orf166 homolog
Q9D7S9	Chmp5	38	0	31	0			Charged multivesicular body protein 5
Q91WU5	As3mt	38	0	30	0			Arsenite methyltransferase
P28352	Apex1	38	0	30	0			DNA-(apurinic or apyrimidinic site) lyase
P28666	Mug2	38	0	30	0			Murinoglobulin-2
Q8BMP6	Acbd3	38	0	22	0			Golgi resident protein GCP60
Q9JKV1	Adrm1	38	0	19	0			Proteasomal ubiquitin receptor ADRM1
P62911	Rpl32	38	0	18	0			60S ribosomal protein L32
Q68FL6	Mars	38	0	18	0			Methionine--tRNA ligase, cytoplasmic
P61961	Ufm1	38	0	18	0			Ubiquitin-fold modifier 1
Q3TDN2	Faf2	38	0	17	0			FAS-associated factor 2
Q99MI1	Erc1	38	0	16	0			ELKS/Rab6-interacting/CAST family member 1
Q7TMB8	Cyfip1	38	0	15	0			Cytoplasmic FMR1-interacting protein 1
Q9D880	Timm50	38	0	13	0			Mitochondrial import inner membrane translocase subunit TIM50
O55098	Stk10	38	0	12	0			Serine/threonine-protein kinase 10
P54310	Lipe	38	0	11	0			Hormone-sensitive lipase
Q8BP40	Acp6	38	0	0	0			Lysophosphatidic acid phosphatase type 6
Q9DCV7	Krt7	37	0	192	0			Keratin, type II cytoskeletal 7
Q3URD3	Slmap	37	0	176	0			Sarcolemmal membrane-associated protein
P24547	Impdh2	37	0	89	0			Inosine-5&#039;-monophosphate dehydrogenase 2
O88696	Clpp	37	0	49	0			Putative ATP-dependent Clp protease proteolytic subunit, mitochondrial
Q91VW5	Golga4	37	0	44	0			Golgin subfamily A member 4
P35235	Ptpn11	37	0	43	0			Tyrosine-protein phosphatase non-receptor type 11
Q5SRX1	Tom1l2	37	0	37	0			TOM1-like protein 2
Q9QYB1	Clic4	37	0	35	0			Chloride intracellular channel protein 4
Q8BVQ5	Ppme1	37	0	35	0			Protein phosphatase methylesterase 1
Q9D2V7	Coro7	37	0	32	0			Coronin-7
Q9CQL1	Magohb	37	0	27	0			Protein mago nashi homolog 2
P61327	Magoh	37	0	27	0			Protein mago nashi homolog
Q70FJ1	Akap9	37	0	26	0			A-kinase anchor protein 9
Q8BZ98	Dnm3	37	0	26	0			Dynamin-3
O70310	Nmt1	37	0	24	0			Glycylpeptide N-tetradecanoyltransferase 1
Q60692	Psmb6	37	0	23	0			Proteasome subunit beta type-6
P54729	Nub1	37	0	17	0			NEDD8 ultimate buster 1
O70492	Snx3	37	0	17	0			Sorting nexin-3
Q9Z0S1	Bpnt1	37	0	16	0			3&#039;(2&#039;),5&#039;-bisphosphate nucleotidase 1
Q3UX10	Tubal3	37	0	15	0			Tubulin alpha chain-like 3
Q9D824	Fip1l1	37	0	13	0			Pre-mRNA 3&#039;-end-processing factor FIP1
Q3UJU9	Rmdn3	37	0	8	0			Regulator of microtubule dynamics protein 3
Q8BG51	Rhot1	37	0	5	0			Mitochondrial Rho GTPase 1
Q9Z110	Aldh18a1	36	0	124	0			Delta-1-pyrroline-5-carboxylate synthase
Q7TNG5	Eml2	36	0	79	0			Echinoderm microtubule-associated protein-like 2
Q9D0R2	Tars	36	0	64	0			Threonine--tRNA ligase, cytoplasmic
Q6NZB0	Dnajc8	36	0	60	0			DnaJ homolog subfamily C member 8
Q8QZY1	Eif3l	36	0	44	0			Eukaryotic translation initiation factor 3 subunit L
P70399	Tp53bp1	36	0	38	0			Tumor suppressor p53-binding protein 1
Q8C2Q3	Rbm14	36	0	35	0			RNA-binding protein 14
Q91V12	Acot7	36	0	34	0			Cytosolic acyl coenzyme A thioester hydrolase
Q8BKG3	Ptk7	36	0	33	0			Inactive tyrosine-protein kinase 7
Q3UGC7	Eif3j1	36	0	31	0			Eukaryotic translation initiation factor 3 subunit J-A
Q66JS6	Eif3j2	36	0	31	0			Eukaryotic translation initiation factor 3 subunit J-B
Q9QXK3	Copg2	36	0	30	0			Coatomer subunit gamma-2
P61922	Abat	36	0	24	0			4-aminobutyrate aminotransferase, mitochondrial
P09242	Alpl	36	0	22	0			Alkaline phosphatase, tissue-nonspecific isozyme
Q9Z172	Sumo3	36	0	20	0			Small ubiquitin-related modifier 3
Q3U0V2	Tradd	36	0	19	0			Tumor necrosis factor receptor type 1-associated DEATH domain protein
Q8BJW6	Eif2a	36	0	14	0			Eukaryotic translation initiation factor 2A
P30115	Gsta3	36	0	11	0			Glutathione S-transferase A3
Q9DC61	Pmpca	36	0	10	0			Mitochondrial-processing peptidase subunit alpha
Q8CHR6	Dpyd	36	0	8	0			Dihydropyrimidine dehydrogenase [NADP(+)]
Q80ZX8	Spag1	36	0	4	0			Sperm-associated antigen 1
P48722	Hspa4l	35	0	99	0			Heat shock 70 kDa protein 4L
Q61702	Itih1	35	0	65	0			Inter-alpha-trypsin inhibitor heavy chain H1
Q8BH04	Pck2	35	0	58	0			Phosphoenolpyruvate carboxykinase [GTP], mitochondrial
P62137	Ppp1ca	35	0	58	0			Serine/threonine-protein phosphatase PP1-alpha catalytic subunit
Q9D554	Sf3a3	35	0	52	0			Splicing factor 3A subunit 3
Q99MD9	Nasp	35	0	50	0			Nuclear autoantigenic sperm protein
Q9JKY5	Hip1r	35	0	47	0			Huntingtin-interacting protein 1-related protein
Q6PFD9	Nup98	35	0	44	0			Nuclear pore complex protein Nup98-Nup96
P83741	Wnk1	35	0	36	0			Serine/threonine-protein kinase WNK1
P01899	H2-D1	35	0	33	0			H-2 class I histocompatibility antigen, D-B alpha chain
P61202	Cops2	35	0	30	0			COP9 signalosome complex subunit 2
P31254	Uba1y	35	0	30	0			Ubiquitin-like modifier-activating enzyme 1 Y
Q9JK81	Myg1	35	0	23	0			UPF0160 protein MYG1, mitochondrial
Q9Z1G4	Atp6v0a1	35	0	22	0			V-type proton ATPase 116 kDa subunit a isoform 1
Q9QXY6	Ehd3	35	0	20	0			EH domain-containing protein 3
Q6ZWM4	Lsm8	35	0	20	0			U6 snRNA-associated Sm-like protein LSm8
Q9D8W5	Psmd12	35	0	18	0			26S proteasome non-ATPase regulatory subunit 12
Q9D1L0	Chchd2	35	0	18	0			Coiled-coil-helix-coiled-coil-helix domain-containing protein 2, mitochondrial
Q9ESX5	Dkc1	35	0	18	0			H/ACA ribonucleoprotein complex subunit 4
Q9D7A8	Armc1	35	0	14	0			Armadillo repeat-containing protein 1
P45377	Akr1b8	35	0	13	0			Aldose reductase-related protein 2
Q8BYA0	Tbcd	35	0	13	0			Tubulin-specific chaperone D
Q6P8I4	Pcnp	35	0	12	0			PEST proteolytic signal-containing nuclear protein
P85094	Isoc2a	35	0	4	0			Isochorismatase domain-containing protein 2A, mitochondrial
Q9DC29	Abcb6	35	0	3	0			ATP-binding cassette sub-family B member 6, mitochondrial
Q62000	Ogn	34	0	252	0			Mimecan
Q9Z2U1	Psma5	34	0	74	0			Proteasome subunit alpha type-5
Q8BMA6	Srp68	34	0	56	0			Signal recognition particle subunit SRP68
Q9Z0N1	Eif2s3x	34	0	52	0			Eukaryotic translation initiation factor 2 subunit 3, X-linked
P61750	Arf4	34	0	51	0			ADP-ribosylation factor 4
O09044	Snap23	34	0	41	0			Synaptosomal-associated protein 23
Q6NV83	U2surp	34	0	40	0			U2 snRNP-associated SURP motif-containing protein
Q9D0L7	Armc10	34	0	39	0			Armadillo repeat-containing protein 10
Q5I2A0	Serpina3g	34	0	38	0			Serine protease inhibitor A3G
Q9JMH6	Txnrd1	34	0	38	0			Thioredoxin reductase 1, cytoplasmic
Q6R0H7	Gnas	34	0	35	0			Guanine nucleotide-binding protein G(s) subunit alpha isoforms XLas
Q9CZY3	Ube2v1	34	0	35	0			Ubiquitin-conjugating enzyme E2 variant 1
Q9JM14	Nt5c	34	0	34	0			5&#039;(3&#039;)-deoxyribonucleotidase, cytosolic type
O54941	Smarce1	34	0	34	0			SWI/SNF-related matrix-associated actin-dependent regulator of chromatin subfamily E member 1
Q9QY76	Vapb	34	0	30	0			Vesicle-associated membrane protein-associated protein B
Q9JJI8	Rpl38	34	0	28	0			60S ribosomal protein L38
Q60739	Bag1	34	0	23	0			BAG family molecular chaperone regulator 1
Q91YI0	Asl	34	0	21	0			Argininosuccinate lyase
Q6ZQ88	Kdm1a	34	0	21	0			Lysine-specific histone demethylase 1A
Q8R086	Suox	34	0	20	0			Sulfite oxidase, mitochondrial
Q8K284	Gtf3c1	34	0	19	0			General transcription factor 3C polypeptide 1
Q52KI8	Srrm1	34	0	19	0			Serine/arginine repetitive matrix protein 1
Q8K1Z0	Coq9	34	0	19	0			Ubiquinone biosynthesis protein COQ9, mitochondrial
P05132	Prkaca	34	0	18	0			cAMP-dependent protein kinase catalytic subunit alpha
Q8BG81	Poldip3	34	0	16	0			Polymerase delta-interacting protein 3
Q8VBZ3	Clptm1	34	0	11	0			Cleft lip and palate transmembrane protein 1 homolog
Q9JIY5	Htra2	34	0	5	0			Serine protease HTRA2, mitochondrial
Q8BIG7	Comtd1	34	0	3	0			Catechol O-methyltransferase domain-containing protein 1
P03930	Mtatp8	34	0	0	0			ATP synthase protein 8
Q8BWM0	Ptges2	34	0	0	0			Prostaglandin E synthase 2
P11679	Krt8	33	0	550	0			Keratin, type II cytoskeletal 8
P46664	Adss	33	0	59	0			Adenylosuccinate synthetase isozyme 2
Q9ESD7	Dysf	33	0	49	0			Dysferlin
P63330	Ppp2ca	33	0	48	0			Serine/threonine-protein phosphatase 2A catalytic subunit alpha isoform
Q62393	Tpd52	33	0	48	0			Tumor protein D52
Q99MR8	Mccc1	33	0	46	0			Methylcrotonoyl-CoA carboxylase subunit alpha, mitochondrial
Q62159	Rhoc	33	0	46	0			Rho-related GTP-binding protein RhoC
Q62448	Eif4g2	33	0	35	0			Eukaryotic translation initiation factor 4 gamma 2
P63094	Gnas	33	0	35	0			Guanine nucleotide-binding protein G(s) subunit alpha isoforms short
Q9QUR6	Prep	33	0	34	0			Prolyl endopeptidase
Q3UDE2	Ttll12	33	0	34	0			Tubulin--tyrosine ligase-like protein 12
P60824	Cirbp	33	0	33	0			Cold-inducible RNA-binding protein
P39053	Dnm1	33	0	33	0			Dynamin-1
Q7TQH0	Atxn2l	33	0	32	0			Ataxin-2-like protein
Q99KV1	Dnajb11	33	0	32	0			DnaJ homolog subfamily B member 11
Q8R0G9	Nup133	33	0	27	0			Nuclear pore complex protein Nup133
P27612	Plaa	33	0	26	0			Phospholipase A-2-activating protein
Q9ERG2	Strn3	33	0	24	0			Striatin-3
Q8BJS4	Sun2	33	0	24	0			SUN domain-containing protein 2
Q6ZQ58	Larp1	33	0	23	0			La-related protein 1
Q8VCR7	Abhd14b	33	0	18	0			Alpha/beta hydrolase domain-containing protein 14B
Q8K5B2	Mcfd2	33	0	18	0			Multiple coagulation factor deficiency protein 2 homolog
Q9R0X4	Acot9	33	0	17	0			Acyl-coenzyme A thioesterase 9, mitochondrial
Q8BUK6	Hook3	33	0	16	0			Protein Hook homolog 3
Q8BGC0	Htatsf1	33	0	15	0			HIV Tat-specific factor 1 homolog
Q61102	Abcb7	33	0	7	0			ATP-binding cassette sub-family B member 7, mitochondrial
Q6PCP5	Mff	33	0	7	0			Mitochondrial fission factor
Q9DBE8	Alg2	33	0	4	0			Alpha-1,3/1,6-mannosyltransferase ALG2
Q6EDY6	Lrrc16a	33	0	4	0			Leucine-rich repeat-containing protein 16A
P51830	Adcy9	33	0	0	0			Adenylate cyclase type 9
P01029	C4b	32	0	98	0			Complement C4-B
P20918	Plg	32	0	84	0			Plasminogen
P54728	Rad23b	32	0	62	0			UV excision repair protein RAD23 homolog B
Q01149	Col1a2	32	0	50	0			Collagen alpha-2(I) chain
P62315	Snrpd1	32	0	50	0			Small nuclear ribonucleoprotein Sm D1
O09106	Hdac1	32	0	48	0			Histone deacetylase 1
Q91WD5	Ndufs2	32	0	47	0			NADH dehydrogenase [ubiquinone] iron-sulfur protein 2, mitochondrial
Q8BJ71	Nup93	32	0	46	0			Nuclear pore complex protein Nup93
Q9CSN1	Snw1	32	0	46	0			SNW domain-containing protein 1
Q6NVF9	Cpsf6	32	0	44	0			Cleavage and polyadenylation specificity factor subunit 6
Q62189	Snrpa	32	0	40	0			U1 small nuclear ribonucleoprotein A
Q9D6J6	Ndufv2	32	0	37	0			NADH dehydrogenase [ubiquinone] flavoprotein 2, mitochondrial
P28738	Kif5c	32	0	31	0			Kinesin heavy chain isoform 5C
O70591	Pfdn2	32	0	31	0			Prefoldin subunit 2
P70698	Ctps1	32	0	29	0			CTP synthase 1
Q9D8Y0	Efhd2	32	0	26	0			EF-hand domain-containing protein D2
Q9QYG0	Ndrg2	32	0	24	0			Protein NDRG2
Q5SWU9	Acaca	32	0	22	0			Acetyl-CoA carboxylase 1
Q99LB2	Dhrs4	32	0	20	0			Dehydrogenase/reductase SDR family member 4
P38060	Hmgcl	32	0	20	0			Hydroxymethylglutaryl-CoA lyase, mitochondrial
Q9DCC4	Pycrl	32	0	20	0			Pyrroline-5-carboxylate reductase 3
P13439	Umps	32	0	15	0			Uridine 5&#039;-monophosphate synthase
Q9CR51	Atp6v1g1	32	0	11	0			V-type proton ATPase subunit G 1
Q8C3X2	Ccdc90b	32	0	10	0			Coiled-coil domain-containing protein 90B, mitochondrial
Q9QZD8	Slc25a10	32	0	9	0			Mitochondrial dicarboxylate carrier
Q06335	Aplp2	32	0	8	0			Amyloid-like protein 2
Q9D9V3	Echdc1	32	0	5	0			Ethylmalonyl-CoA decarboxylase
Q9DB73	Cyb5r1	32	0	5	0			NADH-cytochrome b5 reductase 1
Q9CQ92	Fis1	32	0	3	0			Mitochondrial fission 1 protein
P40630	Tfam	32	0	3	0			Transcription factor A, mitochondrial
Q8JZN7	Rhot2	32	0	0	0			Mitochondrial Rho GTPase 2
A6X935	Itih4	31	0	89	0			Inter alpha-trypsin inhibitor, heavy chain 4
Q6IFZ6	Krt77	31	0	76	0			Keratin, type II cytoskeletal 1b
Q5FWK3	Arhgap1	31	0	73	0			Rho GTPase-activating protein 1
O35691	Pnn	31	0	56	0			Pinin
Q810A7	Ddx42	31	0	46	0			ATP-dependent RNA helicase DDX42
P62869	Tceb2	31	0	43	0			Transcription elongation factor B polypeptide 2
Q9D281	Fam114a1	31	0	42	0			Protein Noxp20
O54962	Banf1	31	0	39	0			Barrier-to-autointegration factor
Q9CX34	Sugt1	31	0	37	0			Suppressor of G2 allele of SKP1 homolog
Q9Z130	Hnrnpdl	31	0	36	0			Heterogeneous nuclear ribonucleoprotein D-like
P62855	Rps26	31	0	33	0			40S ribosomal protein S26
Q9DBS1	Tmem43	31	0	33	0			Transmembrane protein 43
Q9ESP1	Sdf2l1	31	0	32	0			Stromal cell-derived factor 2-like protein 1
O08579	Emd	31	0	30	0			Emerin
Q9QZQ1	Mllt4	31	0	29	0			Afadin
Q9QZE7	Tsnax	31	0	29	0			Translin-associated protein X
Q9DBR0	Akap8	31	0	27	0			A-kinase anchor protein 8
Q9JK48	Sh3glb1	31	0	26	0			Endophilin-B1
Q8K1J6	Trnt1	31	0	21	0			CCA tRNA nucleotidyltransferase 1, mitochondrial
Q9CY57	Chtop	31	0	20	0			Chromatin target of PRMT1 protein
P59999	Arpc4	31	0	18	0			Actin-related protein 2/3 complex subunit 4
Q06185	Atp5i	31	0	18	0			ATP synthase subunit e, mitochondrial
P07309	Ttr	31	0	17	0			Transthyretin
Q9D6P8	Calml3	31	0	15	0			Calmodulin-like protein 3
Q8CCJ3	Ufl1	31	0	14	0			E3 UFM1-protein ligase 1
O88384	Vti1b	31	0	14	0			Vesicle transport through interaction with t-SNAREs homolog 1B
Q8K1E0	Stx5	31	0	13	0			Syntaxin-5
Q9DBB8	Dhdh	31	0	13	0			Trans-1,2-dihydrobenzene-1,2-diol dehydrogenase
Q60648	Gm2a	31	0	10	0			Ganglioside GM2 activator
Q8R238	Sdsl	31	0	9	0			Serine dehydratase-like
Q61239	Fnta	31	0	7	0			Protein farnesyltransferase/geranylgeranyltransferase type-1 subunit alpha
A2AQ07	Tubb1	30	0	55	0			Tubulin beta-1 chain
P61759	Vbp1	30	0	53	0			Prefoldin subunit 3
Q64213	Sf1	30	0	46	0			Splicing factor 1
B2RY56	Rbm25	30	0	45	0			RNA-binding protein 25
Q8JZN5	Acad9	30	0	42	0			Acyl-CoA dehydrogenase family member 9, mitochondrial
Q9ESE1	Lrba	30	0	38	0			Lipopolysaccharide-responsive and beige-like anchor protein
Q80VD1	Fam98b	30	0	36	0			Protein FAM98B
Q61035	Hars	30	0	34	0			Histidine--tRNA ligase, cytoplasmic
Q8R0H9	Gga1	30	0	33	0			ADP-ribosylation factor-binding protein GGA1
Q9JMG7	Hdgfrp3	30	0	33	0			Hepatoma-derived growth factor-related protein 3
Q9D7X3	Dusp3	30	0	30	0			Dual specificity protein phosphatase 3
O35682	Myadm	30	0	30	0			Myeloid-associated differentiation marker
P46938	Yap1	30	0	30	0			Yorkie homolog
P62245	Rps15a	30	0	28	0			40S ribosomal protein S15a
Q60967	Papss1	30	0	27	0			Bifunctional 3&#039;-phosphoadenosine 5&#039;-phosphosulfate synthase 1
Q99MS7	Ehbp1l1	30	0	27	0			EH domain-binding protein 1-like protein 1
Q61553	Fscn1	30	0	27	0			Fascin
Q9D6U8	Fam162a	30	0	22	0			Protein FAM162A
Q8BJU0	Sgta	30	0	22	0			Small glutamine-rich tetratricopeptide repeat-containing protein alpha
A2ASS6	Ttn	30	0	22	0			Titin
Q9CQC9	Sar1b	30	0	21	0			GTP-binding protein SAR1b
Q61686	Cbx5	30	0	19	0			Chromobox protein homolog 5
Q9WVJ2	Psmd13	30	0	18	0			26S proteasome non-ATPase regulatory subunit 13
Q3TLP5	Echdc2	30	0	18	0			Enoyl-CoA hydratase domain-containing protein 2, mitochondrial
Q9JLN9	Mtor	30	0	17	0			Serine/threonine-protein kinase mTOR
Q61103	Dpf2	30	0	17	0			Zinc finger protein ubi-d4
P50543	S100a11	30	0	16	0			Protein S100-A11
Q3TW96	Uap1l1	30	0	13	0			UDP-N-acetylhexosamine pyrophosphorylase-like protein 1
Q9QYA2	Tomm40	30	0	12	0			Mitochondrial import receptor subunit TOM40 homolog
P70452	Stx4	30	0	11	0			Syntaxin-4
Q91VN4	Chchd6	30	0	10	0			Coiled-coil-helix-coiled-coil-helix domain-containing protein 6, mitochondrial
Q6PEB6	Mob4	30	0	8	0			MOB-like protein phocein
Q6A058	Armcx2	30	0	0	0			Armadillo repeat-containing X-linked protein 2
Q9Z1N6	Sfrp4	30	0	0	0			Secreted frizzled-related sequence protein 4
Q9QZM0	Ubqln2	29	0	46	0			Ubiquilin-2
P11798	Camk2a	29	0	44	0			Calcium/calmodulin-dependent protein kinase type II subunit alpha
Q9D1J3	Sarnp	29	0	44	0			SAP domain-containing ribonucleoprotein
Q9DC51	Gnai3	29	0	38	0			Guanine nucleotide-binding protein G(k) subunit alpha
Q99LD8	Ddah2	29	0	37	0			N(G),N(G)-dimethylarginine dimethylaminohydrolase 2
B2RQC6	Cad	29	0	34	0			CAD protein
Q9ER72	Cars	29	0	33	0			Cysteine--tRNA ligase, cytoplasmic
P33175	Kif5a	29	0	29	0			Kinesin heavy chain isoform 5A
Q9Z1T1	Ap3b1	29	0	25	0			AP-3 complex subunit beta-1
Q6PDL0	Dync1li2	29	0	23	0			Cytoplasmic dynein 1 light intermediate chain 2
O89053	Coro1a	29	0	22	0			Coronin-1A
Q61390	Cct6b	29	0	22	0			T-complex protein 1 subunit zeta-2
Q9ET30	Tm9sf3	29	0	17	0			Transmembrane 9 superfamily member 3
P62889	Rpl30	29	0	16	0			60S ribosomal protein L30
P46735	Myo1b	29	0	16	0			Unconventional myosin-Ib
Q9CQ45	Nenf	29	0	15	0			Neudesin
Q9JHW2	Nit2	29	0	15	0			Omega-amidase NIT2
Q62148	Aldh1a2	29	0	13	0			Retinal dehydrogenase 2
Q8CFI7	Polr2b	29	0	11	0			DNA-directed RNA polymerase II subunit RPB2
Q9DBL7	Coasy	29	0	10	0			Bifunctional coenzyme A synthase
Q8CHY6	Gatad2a	29	0	10	0			Transcriptional repressor p66 alpha
Q64337	Sqstm1	29	0	9	0			Sequestosome-1
P57746	Atp6v1d	29	0	8	0			V-type proton ATPase subunit D
Q62425	Ndufa4	29	0	6	0			NADH dehydrogenase [ubiquinone] 1 alpha subcomplex subunit 4
Q5H8C4	Vps13a	29	0	6	0			Vacuolar protein sorting-associated protein 13A
Q61733	Mrps31	29	0	5	0			28S ribosomal protein S31, mitochondrial
Q3UJD6	Usp19	29	0	5	0			Ubiquitin carboxyl-terminal hydrolase 19
Q99J47	Dhrs7b	29	0	3	0			Dehydrogenase/reductase SDR family member 7B
Q8BSL7	Arf2	28	0	69	0			ADP-ribosylation factor 2
Q6WVG3	Kctd12	28	0	58	0			BTB/POZ domain-containing protein KCTD12
Q6P1B1	Xpnpep1	28	0	54	0			Xaa-Pro aminopeptidase 1
P54116	Stom	28	0	53	0			Erythrocyte band 7 integral membrane protein
Q8VDM6	Hnrnpul1	28	0	44	0			Heterogeneous nuclear ribonucleoprotein U-like protein 1
P62715	Ppp2cb	28	0	42	0			Serine/threonine-protein phosphatase 2A catalytic subunit beta isoform
Q9D2M8	Ube2v2	28	0	39	0			Ubiquitin-conjugating enzyme E2 variant 2
P61924	Copz1	28	0	38	0			Coatomer subunit zeta-1
P70302	Stim1	28	0	34	0			Stromal interaction molecule 1
Q52KR3	Prune2	28	0	33	0			Protein prune homolog 2
Q62048	Pea15	28	0	32	0			Astrocytic phosphoprotein PEA-15
O88447	Klc1	28	0	32	0			Kinesin light chain 1
Q3TIV5	Zc3h15	28	0	30	0			Zinc finger CCCH domain-containing protein 15
P62852	Rps25	28	0	29	0			40S ribosomal protein S25
Q6AW69	Cgnl1	28	0	29	0			Cingulin-like protein 1
Q80U93	Nup214	28	0	29	0			Nuclear pore complex protein Nup214
P97493	Txn2	28	0	27	0			Thioredoxin, mitochondrial
Q91VW3	Sh3bgrl3	28	0	25	0			SH3 domain-binding glutamic acid-rich-like protein 3
P08775	Polr2a	28	0	24	0			DNA-directed RNA polymerase II subunit RPB1
Q61301	Ctnna2	28	0	21	0			Catenin alpha-2
Q9CQF3	Nudt21	28	0	19	0			Cleavage and polyadenylation specificity factor subunit 5
Q99K28	Arfgap2	28	0	17	0			ADP-ribosylation factor GTPase-activating protein 2
Q9D7B6	Acad8	28	0	17	0			Isobutyryl-CoA dehydrogenase, mitochondrial
Q9CT10	Ranbp3	28	0	17	0			Ran-binding protein 3
Q08943	Ssrp1	28	0	16	0			FACT complex subunit SSRP1
Q9CWH6	Psma8	28	0	16	0			Proteasome subunit alpha type-7-like
P24668	M6pr	28	0	14	0			Cation-dependent mannose-6-phosphate receptor
Q922P9	Glyr1	28	0	13	0			Putative oxidoreductase GLYR1
P62073	Timm10	28	0	12	0			Mitochondrial import inner membrane translocase subunit Tim10
Q3TL44	Nlrx1	28	0	12	0			NLR family member X1
P53564	Cux1	28	0	11	0			Homeobox protein cut-like 1
Q8K2C9	ptplad1	28	0	9	0			Very-long-chain (3R)-3-hydroxyacyl-[acyl-carrier protein] dehydratase 3
P49586	Pcyt1a	28	0	3	0			Choline-phosphate cytidylyltransferase A
Q8VE22	Mrps23	28	0	0	0			28S ribosomal protein S23, mitochondrial
P50446	Krt6a	27	0	119	0			Keratin, type II cytoskeletal 6A
P11688	Itga5	27	0	71	0			Integrin alpha-5
Q05186	Rcn1	27	0	65	0			Reticulocalbin-1
Q8R326	Pspc1	27	0	64	0			Paraspeckle component 1
Q8CI51	Pdlim5	27	0	56	0			PDZ and LIM domain protein 5
P28652	Camk2b	27	0	50	0			Calcium/calmodulin-dependent protein kinase type II subunit beta
P49443	Ppm1a	27	0	45	0			Protein phosphatase 1A
Q9Z0N2	Eif2s3y	27	0	44	0			Eukaryotic translation initiation factor 2 subunit 3, Y-linked
Q91YT0	Ndufv1	27	0	43	0			NADH dehydrogenase [ubiquinone] flavoprotein 1, mitochondrial
Q9Z1M8	Ik	27	0	43	0			Protein Red
P27641	Xrcc5	27	0	37	0			X-ray repair cross-complementing protein 5
Q9R1K9	Cetn2	27	0	35	0			Centrin-2
Q9D819	Ppa1	27	0	35	0			Inorganic pyrophosphatase
O09131	Gsto1	27	0	34	0			Glutathione S-transferase omega-1
O35206	Col15a1	27	0	33	0			Collagen alpha-1(XV) chain
P46061	Rangap1	27	0	33	0			Ran GTPase-activating protein 1
P70288	Hdac2	27	0	24	0			Histone deacetylase 2
Q8R3G1	Ppp1r8	27	0	24	0			Nuclear inhibitor of protein phosphatase 1
P70335	Rock1	27	0	23	0			Rho-associated protein kinase 1
P25976	Ubtf	27	0	22	0			Nucleolar transcription factor 1
O08915	Aip	27	0	21	0			AH receptor-interacting protein
P47941	Crkl	27	0	19	0			Crk-like protein
Q9CYG7	Tomm34	27	0	19	0			Mitochondrial import receptor subunit TOM34
Q9CQ22	Lamtor1	27	0	19	0			Ragulator complex protein LAMTOR1
P35585	Ap1m1	27	0	18	0			AP-1 complex subunit mu-1
Q8VDC1	Fyco1	27	0	16	0			FYVE and coiled-coil domain-containing protein 1
Q922Q1	44987	27	0	14	0			MC domain-containing protein 2, mitochondrial
P34928	Apoc1	27	0	13	0			Apolipoprotein C-I
Q8VDL4	Adpgk	27	0	10	0			ADP-dependent glucokinase
Q3TDQ1	Stt3b	27	0	10	0			Dolichyl-diphosphooligosaccharide--protein glycosyltransferase subunit STT3B
P47802	Mtx1	27	0	10	0			Metaxin-1
D3Z7P3	Gls	27	0	7	0			Glutaminase kidney isoform, mitochondrial
Q9D6K5	Synj2bp	27	0	7	0			Synaptojanin-2-binding protein
Q8CC35	Synpo	27	0	7	0			Synaptopodin
Q9D7N3	Mrps9	27	0	3	0			28S ribosomal protein S9, mitochondrial
Q8BLN5	Lss	27	0	0	0			Lanosterol synthase
Q8BMF3	Me3	27	0	0	0			NADP-dependent malic enzyme, mitochondrial
Q9Z2G9	Htatip2	27	0	0	0			Oxidoreductase HTATIP2
Q9Z331	Krt6b	26	0	102	0			Keratin, type II cytoskeletal 6B
Q8CHH9	45177	26	0	61	0			Septin-8
A2ASQ1	Agrn	26	0	56	0			Agrin
P62141	Ppp1cb	26	0	55	0			Serine/threonine-protein phosphatase PP1-beta catalytic subunit
Q8VE37	Rcc1	26	0	54	0			Regulator of chromosome condensation
Q6P5H2	Nes	26	0	38	0			Nestin
Q9CQZ1	Hsbp1	26	0	34	0			Heat shock factor-binding protein 1
Q9R1P3	Psmb2	26	0	33	0			Proteasome subunit beta type-2
O88952	Lin7c	26	0	32	0			Protein lin-7 homolog C
Q9DB34	Chmp2a	26	0	30	0			Charged multivesicular body protein 2a
Q9WVB0	Rbpms	26	0	29	0			RNA-binding protein with multiple splicing
Q6A4J8	Usp7	26	0	29	0			Ubiquitin carboxyl-terminal hydrolase 7
O88543	Cops3	26	0	27	0			COP9 signalosome complex subunit 3
Q9EQ06	Hsd17b11	26	0	27	0			Estradiol 17-beta-dehydrogenase 11
P19221	F2	26	0	27	0			Prothrombin
Q9WTX6	Cul1	26	0	26	0			Cullin-1
Q8CGA0	Ppm1f	26	0	26	0			Protein phosphatase 1F
Q9Z2N8	Actl6a	26	0	23	0			Actin-like protein 6A
Q9D7M8	Polr2d	26	0	22	0			DNA-directed RNA polymerase II subunit RPB4
Q8R574	Prpsap2	26	0	22	0			Phosphoribosyl pyrophosphate synthase-associated protein 2
P57759	Erp29	26	0	21	0			Endoplasmic reticulum resident protein 29
Q9CQ10	Chmp3	26	0	20	0			Charged multivesicular body protein 3
Q9EQH2	Erap1	26	0	19	0			Endoplasmic reticulum aminopeptidase 1
Q9WVR4	Fxr2	26	0	18	0			Fragile X mental retardation syndrome-related protein 2
Q8VC30	Dak	26	0	17	0			Bifunctional ATP-dependent dihydroxyacetone kinase/FAD-AMP lyase (cyclizing)
Q8BT60	Cpne3	26	0	17	0			Copine-3
Q8BHG1	Nrd1	26	0	17	0			Nardilysin
Q80VP1	Epn1	26	0	16	0			Epsin-1
Q61187	Tsg101	26	0	16	0			Tumor susceptibility gene 101 protein
Q8VE97	Srsf4	26	0	15	0			Serine/arginine-rich splicing factor 4
Q921W0	Chmp1a	26	0	14	0			Charged multivesicular body protein 1a
Q9QYS9	Qki	26	0	13	0			Protein quaking
P61514	Rpl37a	26	0	10	0			60S ribosomal protein L37a
A2A5R2	Arfgef2	26	0	7	0			Brefeldin A-inhibited guanine nucleotide-exchange protein 2
Q8R404	Qil1	26	0	7	0			Protein QIL1
A2A432	Cul4b	26	0	6	0			Cullin-4B
Q9JJF0	Nap1l5	26	0	4	0			Nucleosome assembly protein 1-like 5
Q924Z4	Cers2	26	0	0	0			Ceramide synthase 2
P13745	Gsta1	26	0	0	0			Glutathione S-transferase A1
O88441	Mtx2	26	0	0	0			Metaxin-2
Q791T5	Mtch1	26	0	0	0			Mitochondrial carrier homolog 1
Q62422	Ostf1	26	0	0	0			Osteoclast-stimulating factor 1
P01921	H2-Ab1	26	0	0	0			H-2 class II histocompatibility antigen, A-D beta chain
Q9QYF1	Rdh11	26	0	0	0			Retinol dehydrogenase 11
Q3TZZ7	Esyt2	25	0	59	0			Extended synaptotagmin-2
Q9CZ30	Ola1	25	0	34	0			Obg-like ATPase 1
P36993	Ppm1b	25	0	34	0			Protein phosphatase 1B
Q9JKB1	Uchl3	25	0	33	0			Ubiquitin carboxyl-terminal hydrolase isozyme L3
Q8VCF0	Mavs	25	0	32	0			Mitochondrial antiviral-signaling protein
Q61210	Arhgef1	25	0	32	0			Rho guanine nucleotide exchange factor 1
P97310	Mcm2	25	0	30	0			DNA replication licensing factor MCM2
P36536	Sar1a	25	0	30	0			GTP-binding protein SAR1a
Q9Z1W8	Atp12a	25	0	30	0			Potassium-transporting ATPase alpha chain 2
P32233	Drg1	25	0	28	0			Developmentally-regulated GTP-binding protein 1
P21279	Gnaq	25	0	26	0			Guanine nucleotide-binding protein G(q) subunit alpha
Q91YE6	Ipo9	25	0	25	0			Importin-9
Q8K4Z3	Apoa1bp	25	0	25	0			NAD(P)H-hydrate epimerase
Q60631	Grb2	25	0	24	0			Growth factor receptor-bound protein 2
Q6PIU9	1	25	0	22	0			Uncharacterized protein FLJ45252 homolog
O88271	Cfdp1	25	0	21	0			Craniofacial development protein 1
P01898	H2-Q10	25	0	21	0			H-2 class I histocompatibility antigen, Q10 alpha chain
Q61136	Prpf4b	25	0	20	0			Serine/threonine-protein kinase PRP4 homolog
Q7TPD0	Ints3	25	0	17	0			Integrator complex subunit 3
P41216	Acsl1	25	0	17	0			Long-chain-fatty-acid--CoA ligase 1
O88712	Ctbp1	25	0	16	0			C-terminal-binding protein 1
O88958	Gnpda1	25	0	16	0			Glucosamine-6-phosphate isomerase 1
P61967	Ap1s1	25	0	15	0			AP-1 complex subunit sigma-1A
Q8C522	Endod1	25	0	14	0			Endonuclease domain-containing 1 protein
Q8WTY4	Ciapin1	25	0	11	0			Anamorsin
Q3UNZ8	1	25	0	11	0			Quinone oxidoreductase-like protein 2
O88967	Yme1l1	25	0	9	0			ATP-dependent zinc metalloprotease YME1L1
Q3V132	Slc25a31	25	0	8	0			ADP/ATP translocase 4
Q8BH43	Wasf2	25	0	8	0			Wiskott-Aldrich syndrome protein family member 2
A2AJI0	Map7d1	25	0	7	0			MAP7 domain-containing protein 1
Q8K0D5	Gfm1	25	0	6	0			Elongation factor G, mitochondrial
O70475	Ugdh	25	0	6	0			UDP-glucose 6-dehydrogenase
P61022	Chp1	25	0	5	0			Calcineurin B homologous protein 1
Q14C51	Ptcd3	25	0	5	0			Pentatricopeptide repeat domain-containing protein 3, mitochondrial
Q9CWZ7	Napg	25	0	4	0			Gamma-soluble NSF attachment protein
P10648	Gsta2	25	0	3	0			Glutathione S-transferase A2
Q2TBE6	Pi4k2a	25	0	3	0			Phosphatidylinositol 4-kinase type 2-alpha
Q99N87	Mrps5	25	0	0	0			28S ribosomal protein S5, mitochondrial
Q9JI39	Abcb10	25	0	0	0			ATP-binding cassette sub-family B member 10, mitochondrial
Q922J9	Far1	25	0	0	0			Fatty acyl-CoA reductase 1
Q8C3X8	Lmf2	25	0	0	0			Lipase maturation factor 2
Q9WVA2	Timm8a1	25	0	0	0			Mitochondrial import inner membrane translocase subunit Tim8 A
Q9D023	Mpc2	25	0	0	0			Mitochondrial pyruvate carrier 2
P11531	Dmd	24	0	245	0			Dystrophin
Q3TJD7	Pdlim7	24	0	114	0			PDZ and LIM domain protein 7
Q8BGZ7	Krt75	24	0	92	0			Keratin, type II cytoskeletal 75
O55137	Acot1	24	0	64	0			Acyl-coenzyme A thioesterase 1
Q9DCT8	Crip2	24	0	60	0			Cysteine-rich protein 2
Q8BJD1	Itih5	24	0	55	0			Inter-alpha-trypsin inhibitor heavy chain H5
P62320	Snrpd3	24	0	48	0			Small nuclear ribonucleoprotein Sm D3
P84084	Arf5	24	0	45	0			ADP-ribosylation factor 5
Q8R1V4	Tmed4	24	0	43	0			Transmembrane emp24 domain-containing protein 4
P02104	Hbb-y	24	0	31	0			Hemoglobin subunit epsilon-Y2
Q8VCA8	Scrn2	24	0	31	0			Secernin-2
Q9R112	Sqrdl	24	0	31	0			Sulfide:quinone oxidoreductase, mitochondrial
P83940	Tceb1	24	0	31	0			Transcription elongation factor B polypeptide 1
Q61739	Itga6	24	0	30	0			Integrin alpha-6
Q5SUF2	Luc7l3	24	0	30	0			Luc7-like protein 3
Q63850	Nup62	24	0	30	0			Nuclear pore glycoprotein p62
Q3UHX2	Pdap1	24	0	29	0			28 kDa heat- and acid-stable phosphoprotein
Q9R1C7	Prpf40a	24	0	29	0			Pre-mRNA-processing factor 40 homolog A
Q5EG47	Prkaa1	24	0	28	0			5&#039;-AMP-activated protein kinase catalytic subunit alpha-1
Q9CVB6	Arpc2	24	0	27	0			Actin-related protein 2/3 complex subunit 2
Q61490	Alcam	24	0	24	0			CD166 antigen
Q9EPL8	Ipo7	24	0	24	0			Importin-7
P30412	Ppic	24	0	24	0			Peptidyl-prolyl cis-trans isomerase C
P52479	Usp10	24	0	24	0			Ubiquitin carboxyl-terminal hydrolase 10
Q9CWL8	Ctnnbl1	24	0	23	0			Beta-catenin-like protein 1
P00493	Hprt1	24	0	23	0			Hypoxanthine-guanine phosphoribosyltransferase
Q9CQM5	Txndc17	24	0	23	0			Thioredoxin domain-containing protein 17
Q61206	Pafah1b2	24	0	21	0			Platelet-activating factor acetylhydrolase IB subunit beta
Q922D4	Ppp6r3	24	0	21	0			Serine/threonine-protein phosphatase 6 regulatory subunit 3
Q9ERR7	45184	24	0	17	0			15 kDa selenoprotein
Q6ZPZ3	Zc3h4	24	0	17	0			Zinc finger CCCH domain-containing protein 4
O35638	Stag2	24	0	16	0			Cohesin subunit SA-2
Q8BY87	Usp47	24	0	16	0			Ubiquitin carboxyl-terminal hydrolase 47
P67871	Csnk2b	24	0	15	0			Casein kinase II subunit beta
O08582	Gtpbp1	24	0	14	0			GTP-binding protein 1
Q8R361	Rab11fip5	24	0	14	0			Rab11 family-interacting protein 5
O88448	Klc2	24	0	12	0			Kinesin light chain 2
Q9CQW1	Ykt6	24	0	12	0			Synaptobrevin homolog YKT6
Q9CRD2	Emc2	24	0	11	0			ER membrane protein complex subunit 2
O70305	Atxn2	24	0	10	0			Ataxin-2
P21958	Tap1	24	0	9	0			Antigen peptide transporter 1
Q9D0L8	Rnmt	24	0	8	0			mRNA cap guanine-N7 methyltransferase
Q99KY4	Gak	24	0	7	0			Cyclin-G-associated kinase
Q9JLZ3	Auh	24	0	7	0			Methylglutaconyl-CoA hydratase, mitochondrial
Q07813	Bax	24	0	6	0			Apoptosis regulator BAX
O70172	Pip4k2a	24	0	5	0			Phosphatidylinositol 5-phosphate 4-kinase type-2 alpha
Q9R0E1	Plod3	24	0	5	0			Procollagen-lysine,2-oxoglutarate 5-dioxygenase 3
P97363	Sptlc2	24	0	4	0			Serine palmitoyltransferase 2
Q9R002	Ifi202	24	0	0	0			Interferon-activable protein 202
Q64487	Ptprd	24	0	0	0			Receptor-type tyrosine-protein phosphatase delta
Q8VE09	Ttc39c	24	0	0	0			Tetratricopeptide repeat protein 39C
Q62005	Zp1	24	0	0	0			Zona pellucida sperm-binding protein 1
P19001	Krt19	23	0	283	0			Keratin, type I cytoskeletal 19
Q921U8	Smtn	23	0	239	0			Smoothelin
P04919	Slc4a1	23	0	146	0			Band 3 anion transport protein
Q91XV3	Basp1	23	0	80	0			Brain acid soluble protein 1
Q8CH18	Ccar1	23	0	64	0			Cell division cycle and apoptosis regulator protein 1
O35215	Ddt	23	0	56	0			D-dopachrome decarboxylase
Q9CXW3	Cacybp	23	0	47	0			Calcyclin-binding protein
Q3THS6	Mat2a	23	0	43	0			S-adenosylmethionine synthase isoform type-2
Q8BU30	Iars	23	0	41	0			Isoleucine--tRNA ligase, cytoplasmic
P53810	Pitpna	23	0	41	0			Phosphatidylinositol transfer protein alpha isoform
Q5SSZ5	Tns3	23	0	41	0			Tensin-3
P49817	Cav1	23	0	38	0			Caveolin-1
Q91W50	Csde1	23	0	36	0			Cold shock domain-containing protein E1
Q9EPB4	Pycard	23	0	35	0			Apoptosis-associated speck-like protein containing a CARD
Q9D666	Sun1	23	0	34	0			SUN domain-containing protein 1
P12815	Pdcd6	23	0	33	0			Programmed cell death protein 6
Q9D832	Dnajb4	23	0	31	0			DnaJ homolog subfamily B member 4
Q8R1F1	Fam129b	23	0	25	0			Niban-like protein 1
A2ADY9	Ddi2	23	0	25	0			Protein DDI1 homolog 2
Q8CFX1	H6pd	23	0	22	0			GDH/6PGL endoplasmic bifunctional protein
Q8VD04	Gripap1	23	0	22	0			GRIP1-associated protein 1
P43024	Cox6a1	23	0	20	0			Cytochrome c oxidase subunit 6A1, mitochondrial
Q0VGB7	Ppp4r2	23	0	18	0			Serine/threonine-protein phosphatase 4 regulatory subunit 2
Q8C0I1	Agps	23	0	17	0			Alkyldihydroxyacetonephosphate synthase, peroxisomal
P70699	Gaa	23	0	17	0			Lysosomal alpha-glucosidase
P35762	Cd81	23	0	16	0			CD81 antigen
G5E870	Trip12	23	0	16	0			E3 ubiquitin-protein ligase TRIP12
Q3UKJ7	Smu1	23	0	16	0			WD40 repeat-containing protein SMU1
Q69ZR2	Hectd1	23	0	15	0			E3 ubiquitin-protein ligase HECTD1
Q7TPH6	Mycbp2	23	0	14	0			Probable E3 ubiquitin-protein ligase MYCBP2
Q6NZN0	Rbm26	23	0	14	0			RNA-binding protein 26
O08759	Ube3a	23	0	13	0			Ubiquitin-protein ligase E3A
Q99KB8	Hagh	23	0	12	0			Hydroxyacylglutathione hydrolase, mitochondrial
Q8R2Y8	Ptrh2	23	0	12	0			Peptidyl-tRNA hydrolase 2, mitochondrial
Q60759	Gcdh	23	0	11	0			Glutaryl-CoA dehydrogenase, mitochondrial
Q9DCD2	Xab2	23	0	10	0			Pre-mRNA-splicing factor SYF1
Q8K297	Colgalt1	23	0	10	0			Procollagen galactosyltransferase 1
P47934	Crat	23	0	9	0			Carnitine O-acetyltransferase
P56394	Cox17	23	0	9	0			Cytochrome c oxidase copper chaperone
Q9EPE9	Atp13a1	23	0	9	0			Probable cation-transporting ATPase 13A1
Q99PL6	Ubxn6	23	0	8	0			UBX domain-containing protein 6
Q9CQV1	Pam16	23	0	7	0			Mitochondrial import inner membrane translocase subunit TIM16
Q8R4U7	Luzp1	23	0	6	0			Leucine zipper protein 1
A2AWA9	Rabgap1	23	0	6	0			Rab GTPase-activating protein 1
P19137	Lama1	23	0	4	0			Laminin subunit alpha-1
Q9WV85	Nme3	23	0	4	0			Nucleoside diphosphate kinase 3
P35282	Rab21	23	0	4	0			Ras-related protein Rab-21
Q9CQ69	Uqcrq	23	0	0	0			Cytochrome b-c1 complex subunit 8
Q9CXR1	Dhrs7	23	0	0	0			Dehydrogenase/reductase SDR family member 7
Q9WVG5	Lipg	23	0	0	0			Endothelial lipase
Q9Z1P7	Kank3	23	0	0	0			KN motif and ankyrin repeat domain-containing protein 3
Q9R1J0	Nsdhl	23	0	0	0			Sterol-4-alpha-carboxylate 3-dehydrogenase, decarboxylating
Q9D710	Tmx2	23	0	0	0			Thioredoxin-related transmembrane protein 2
P15508	Sptb	22	0	198	0			Spectrin beta chain, erythrocytic
Q9QYC0	Add1	22	0	73	0			Alpha-adducin
P63168	Dynll1	22	0	65	0			Dynein light chain 1, cytoplasmic
Q9JK92	Hspb8	22	0	45	0			Heat shock protein beta-8
P47791	Gsr	22	0	42	0			Glutathione reductase, mitochondrial
Q9QXS6	Dbn1	22	0	39	0			Drebrin
Q8BU33	Ilvbl	22	0	38	0			Acetolactate synthase-like protein
Q3UPH1	Prrc1	22	0	35	0			Protein PRRC1
P70290	Mpp1	22	0	32	0			55 kDa erythrocyte membrane protein
Q61235	Sntb2	22	0	31	0			Beta-2-syntrophin
Q8C7E9	Cstf2t	22	0	30	0			Cleavage stimulation factor subunit 2 tau variant
P97324	G6pd2	22	0	29	0			Glucose-6-phosphate 1-dehydrogenase 2
Q64G17	Anp32c	22	0	29	0			Putative acidic leucine-rich nuclear phosphoprotein 32 family member C
Q6PE01	Snrnp40	22	0	27	0			U5 small nuclear ribonucleoprotein 40 kDa protein
P46467	Vps4b	22	0	27	0			Vacuolar protein sorting-associated protein 4B
P06467	Hbz	22	0	26	0			Hemoglobin subunit zeta
P61164	Actr1a	22	0	25	0			Alpha-centractin
Q8BK67	Rcc2	22	0	25	0			Protein RCC2
P18654	Rps6ka3	22	0	25	0			Ribosomal protein S6 kinase alpha-3
Q9R0M4	Podxl	22	0	24	0			Podocalyxin
Q80XI3	Eif4g3	22	0	23	0			Eukaryotic translation initiation factor 4 gamma 3
Q62348	Tsn	22	0	23	0			Translin
Q9CZR8	Tsfm	22	0	22	0			Elongation factor Ts, mitochondrial
Q80UU9	Pgrmc2	22	0	22	0			Membrane-associated progesterone receptor component 2
O35609	Scamp3	22	0	19	0			Secretory carrier-associated membrane protein 3
P70697	Urod	22	0	19	0			Uroporphyrinogen decarboxylase
Q4VA53	Pds5b	22	0	17	0			Sister chromatid cohesion protein PDS5 homolog B
Q11136	Pepd	22	0	17	0			Xaa-Pro dipeptidase
Q61510	Trim25	22	0	16	0			E3 ubiquitin/ISG15 ligase TRIM25
Q9QUJ7	Acsl4	22	0	16	0			Long-chain-fatty-acid--CoA ligase 4
Q8BI72	Cdkn2aip	22	0	15	0			CDKN2A-interacting protein
P46978	Stt3a	22	0	15	0			Dolichyl-diphosphooligosaccharide--protein glycosyltransferase subunit STT3A
P41317	Mbl2	22	0	15	0			Mannose-binding protein C
P55258	Rab8a	22	0	15	0			Ras-related protein Rab-8A
Q9CW46	Raver1	22	0	15	0			Ribonucleoprotein PTB-binding 1
P56135	Atp5j2	22	0	13	0			ATP synthase subunit f, mitochondrial
Q9D0S9	Hint2	22	0	13	0			Histidine triad nucleotide-binding protein 2, mitochondrial
Q99PG2	Ogfr	22	0	13	0			Opioid growth factor receptor
P42232	Stat5b	22	0	13	0			Signal transducer and activator of transcription 5B
Q8BH74	Nup107	22	0	11	0			Nuclear pore complex protein Nup107
Q3UPF5	Zc3hav1	22	0	10	0			Zinc finger CCCH-type antiviral protein 1
Q8K1X1	Wdr11	22	0	9	0			WD repeat-containing protein 11
Q80XI4	Pip4k2b	22	0	8	0			Phosphatidylinositol 5-phosphate 4-kinase type-2 beta
Q9D1R9	Rpl34	22	0	7	0			60S ribosomal protein L34
Q61165	Slc9a1	22	0	7	0			Sodium/hydrogen exchanger 1
Q8VCN6	Cd99	22	0	6	0			CD99 antigen
P50637	Tspo	22	0	4	0			Translocator protein
Q570Y9	Deptor	22	0	3	0			DEP domain-containing mTOR-interacting protein
Q6ZPF4	Fmnl3	22	0	0	0			Formin-like protein 3
Q9JLM9	Grb14	22	0	0	0			Growth factor receptor-bound protein 14
O35969	Gamt	22	0	0	0			Guanidinoacetate N-methyltransferase
Q9DCB8	Isca2	22	0	0	0			Iron-sulfur cluster assembly 2 homolog, mitochondrial
O88561	Slc27a3	22	0	0	0			Long-chain fatty acid transport protein 3
P00920	Ca2	21	0	233	0			Carbonic anhydrase 2
P32261	Serpinc1	21	0	77	0			Antithrombin-III
Q02013	Aqp1	21	0	64	0			Aquaporin-1
O88990	Actn3	21	0	55	0			Alpha-actinin-3
P63005	Pafah1b1	21	0	52	0			Platelet-activating factor acetylhydrolase IB subunit alpha
P23492	Pnp	21	0	45	0			Purine nucleoside phosphorylase
Q9Z2A9	Ggt5	21	0	42	0			Gamma-glutamyltransferase 5
O70456	Sfn	21	0	40	0			14-3-3 protein sigma
Q9R1P0	Psma4	21	0	35	0			Proteasome subunit alpha type-4
Q8R050	Gspt1	21	0	33	0			Eukaryotic peptide chain release factor GTP-binding subunit ERF3A
Q9JL35	Hmgn5	21	0	32	0			High mobility group nucleosome-binding domain-containing protein 5
Q9JJ28	Flii	21	0	32	0			Protein flightless-1 homolog
Q80U72	Scrib	21	0	32	0			Protein scribble homolog
O70439	Stx7	21	0	32	0			Syntaxin-7
P54923	Adprh	21	0	30	0			[Protein ADP-ribosylarginine] hydrolase
Q3TC93	Hs1bp3	21	0	30	0			HCLS1-binding protein 3
Q0GNC1	Inf2	21	0	30	0			Inverted formin-2
Q8R010	Aimp2	21	0	29	0			Aminoacyl tRNA synthase complex-interacting multifunctional protein 2
Q9QY36	Naa10	21	0	29	0			N-alpha-acetyltransferase 10
P97370	Atp1b3	21	0	28	0			Sodium/potassium-transporting ATPase subunit beta-3
Q80WW9	Ddrgk1	21	0	27	0			DDRGK domain-containing protein 1
Q8BHD7	Ptbp3	21	0	26	0			Polypyrimidine tract-binding protein 3
Q6ZQ08	Cnot1	21	0	25	0			CCR4-NOT transcription complex subunit 1
Q505F5	Lrrc47	21	0	25	0			Leucine-rich repeat-containing protein 47
Q9WVA3	Bub3	21	0	24	0			Mitotic checkpoint protein BUB3
Q9DCL8	Ppp1r2	21	0	23	0			Protein phosphatase inhibitor 2
P70122	Sbds	21	0	22	0			Ribosome maturation protein SBDS
P70318	Tial1	21	0	21	0			Nucleolysin TIAR
Q9ESB3	Hrg	21	0	19	0			Histidine-rich glycoprotein
Q99LR1	Abhd12	21	0	19	0			Monoacylglycerol lipase ABHD12
Q91W39	Ncoa5	21	0	19	0			Nuclear receptor coactivator 5
Q3TDD9	Ppp1r21	21	0	19	0			Protein phosphatase 1 regulatory subunit 21
Q9ERB0	Snap29	21	0	19	0			Synaptosomal-associated protein 29
Q6IRU5	Cltb	21	0	18	0			Clathrin light chain B
Q9DCS9	Ndufb10	21	0	18	0			NADH dehydrogenase [ubiquinone] 1 beta subcomplex subunit 10
Q3UGR5	Hdhd2	21	0	17	0			Haloacid dehalogenase-like hydrolase domain-containing protein 2
O55013	Trappc3	21	0	17	0			Trafficking protein particle complex subunit 3
Q61550	Rad21	21	0	16	0			Double-strand-break repair protein rad21 homolog
Q9D6V8	Paip2	21	0	16	0			Polyadenylate-binding protein-interacting protein 2
P50171	Hsd17b8	21	0	15	0			Estradiol 17-beta-dehydrogenase 8
P28660	Nckap1	21	0	15	0			Nck-associated protein 1
Q9D6J5	Ndufb8	21	0	14	0			NADH dehydrogenase [ubiquinone] 1 beta subcomplex subunit 8, mitochondrial
Q61749	Eif2b4	21	0	14	0			Translation initiation factor eIF-2B subunit delta
Q9ERI6	Rdh14	21	0	13	0			Retinol dehydrogenase 14
Q8VCI5	Pex19	21	0	12	0			Peroxisomal biogenesis factor 19
Q3UMB9	Kiaa1033	21	0	11	0			WASH complex subunit 7
Q9D8S3	Arfgap3	21	0	9	0			ADP-ribosylation factor GTPase-activating protein 3
P23242	Gja1	21	0	9	0			Gap junction alpha-1 protein
Q9WU40	Lemd3	21	0	9	0			Inner nuclear membrane protein Man1
Q6PGB8	Smarca1	21	0	9	0			Probable global transcription activator SNF2L1
Q9D8L5	Ccdc91	21	0	8	0			Coiled-coil domain-containing protein 91
Q8BXA1	Golim4	21	0	8	0			Golgi integral membrane protein 4
Q922B9	Ssfa2	21	0	7	0			Sperm-specific antigen 2 homolog
Q02780	Nfia	21	0	5	0			Nuclear factor 1 A-type
O55234	Psmb5	21	0	5	0			Proteasome subunit beta type-5
P61021	Rab5b	21	0	5	0			Ras-related protein Rab-5B
Q69Z99	Znf512	21	0	5	0			Zinc finger protein 512
Q8K370	Acad10	21	0	4	0			Acyl-CoA dehydrogenase family member 10
P23591	Tsta3	21	0	4	0			GDP-L-fucose synthase
P27601	Gna13	21	0	4	0			Guanine nucleotide-binding protein subunit alpha-13
Q9CR21	Ndufab1	21	0	0	0			Acyl carrier protein, mitochondrial
P29416	Hexa	21	0	0	0			Beta-hexosaminidase subunit alpha
Q6PGH1	Bud31	21	0	0	0			Protein BUD31 homolog
Q76LS9	Fam63a	21	0	0	0			Protein FAM63A
Q08091	Cnn1	20	0	337	0			Calponin-1
Q8K183	Pdxk	20	0	262	0			Pyridoxal kinase
Q922U2	Krt5	20	0	140	0			Keratin, type II cytoskeletal 5
P06909	Cfh	20	0	75	0			Complement factor H
Q9QYB5	Add3	20	0	60	0			Gamma-adducin
P23506	Pcmt1	20	0	56	0			Protein-L-isoaspartate(D-aspartate) O-methyltransferase
Q99KD5	Unc45a	20	0	46	0			Protein unc-45 homolog A
Q5DTM8	Rnf20	20	0	43	0			E3 ubiquitin-protein ligase BRE1A
Q9CPU0	Glo1	20	0	35	0			Lactoylglutathione lyase
P61971	Nutf2	20	0	34	0			Nuclear transport factor 2
Q9CS42	Prps2	20	0	32	0			Ribose-phosphate pyrophosphokinase 2
Q6NSR8	Npepl1	20	0	31	0			Probable aminopeptidase NPEPL1
O08807	Prdx4	20	0	26	0			Peroxiredoxin-4
Q9JI10	Stk3	20	0	23	0			Serine/threonine-protein kinase 3
Q9D1L9	Lamtor5	20	0	22	0			Ragulator complex protein LAMTOR5
Q8BRN9	Cc2d1b	20	0	21	0			Coiled-coil and C2 domain-containing protein 1B
P17095	Hmga1	20	0	21	0			High mobility group protein HMG-I/HMG-Y
Q91W89	Man2c1	20	0	20	0			Alpha-mannosidase 2C1
Q9D883	U2af1	20	0	19	0			Splicing factor U2AF 35 kDa subunit
O09164	Sod3	20	0	18	0			Extracellular superoxide dismutase [Cu-Zn]
P04370	Mbp	20	0	17	0			Myelin basic protein
Q9JLV5	Cul3	20	0	16	0			Cullin-3
O88851	Rbbp9	20	0	16	0			Putative hydrolase RBBP9
O70585	Dtnb	20	0	15	0			Dystrobrevin beta
P22315	Fech	20	0	14	0			Ferrochelatase, mitochondrial
Q9CX00	Ist1	20	0	14	0			IST1 homolog
Q9Z0W3	Nup160	20	0	14	0			Nuclear pore complex protein Nup160
Q60974	Ncor1	20	0	12	0			Nuclear receptor corepressor 1
Q99JT9	Adi1	20	0	11	0			1,2-dihydroxy-3-keto-5-methylthiopentene dioxygenase
Q9JHS4	Clpx	20	0	11	0			ATP-dependent Clp protease ATP-binding subunit clpX-like, mitochondrial
Q9CQI6	Cotl1	20	0	11	0			Coactosin-like protein
Q80U63	Mfn2	20	0	11	0			Mitofusin-2
Q9ES28	Arhgef7	20	0	11	0			Rho guanine nucleotide exchange factor 7
Q8CH25	Sltm	20	0	11	0			SAFB-like transcription modulator
Q8BKZ9	Pdhx	20	0	10	0			Pyruvate dehydrogenase protein X component, mitochondrial
Q9Z127	Slc7a5	20	0	9	0			Large neutral amino acids transporter small subunit 1
Q9R0B9	Plod2	20	0	7	0			Procollagen-lysine,2-oxoglutarate 5-dioxygenase 2
P59279	Rab2b	20	0	7	0			Ras-related protein Rab-2B
P16675	Ctsa	20	0	6	0			Lysosomal protective protein
Q9CVD2	Atxn3	20	0	4	0			Ataxin-3
Q62384	Znf259	20	0	4	0			Zinc finger protein ZPR1
Q9JKF7	Mrpl39	20	0	3	0			39S ribosomal protein L39, mitochondrial
O08528	Hk2	20	0	3	0			Hexokinase-2
Q9WTQ8	Timm23	20	0	3	0			Mitochondrial import inner membrane translocase subunit Tim23
Q8VD66	Abhd4	20	0	0	0			Abhydrolase domain-containing protein 4
[truncated: 3,190 more rows]
