# Supplementary material for: Exceptional longevity of mammalian ovarian and oocyte macromolecules throughout the reproductive lifespan
Source: eLife. 2024 Oct 31;13:RP93172. doi: 10.7554/eLife.93172 (PMC11527430; doi:10.7554/eLife.93172)
Supplement: Supplementary file 2. [file elife-93172-supp2.xlsx]

## Sheet: Sheet1
Accession	Gene name	14N spectral counts, 6 month chase	15N spectral counts, 6 month chase	14N spectral counts, 10 month chase	15N spectral counts, 10 month chase	15N-remaining at 6 months (FA)	15N-remaining at 10 months (FA)	description
Q6P8J7	Ckmt2	236	201	31	0	98.9663		Creatine kinase S-type, mitochondrial
Q9CPQ8	Atp5l	12	13	16	0	98.8181		ATP synthase subunit g, mitochondrial
P51667	Myl2	3	2			98.667		Myosin regulatory light chain 2, ventricular/cardiac muscle isoform
Q91Z83	Myh7	238	150	2	0	97.7856		Myosin-7
P48772	Cox8b	82	87			97.5867		Cytochrome c oxidase subunit 8B, mitochondrial
P51174	Acadl	233	211	26	0	97.541		Long-chain specific acyl-CoA dehydrogenase, mitochondrial
Q02566	Myh6	332	213	2	0	97.353		Myosin-6
Q8K2B3	Sdha	274	255	79	0	97.281		Succinate dehydrogenase [ubiquinone] flavoprotein subunit, mitochondrial
P50544	Acadvl	48	38	4	0	97.0422		Very long-chain specific acyl-CoA dehydrogenase, mitochondrial
P08074	Cbr2	8	5	1	0	96.9913		Carbonyl reductase [NADPH] 2
Q8VEM8	Slc25a3	86	72	140	0	96.6599		Phosphate carrier protein, mitochondrial
P63030	Mpc1	7	7			96.5503		Mitochondrial pyruvate carrier 1
Q9CQ69	Uqcrq	85	66	5	0	96.2983		Cytochrome b-c1 complex subunit 8
Q8BMS1	Hadha	333	251	64	0	95.9674		Trifunctional enzyme subunit alpha, mitochondrial
Q9CQ62	Decr1	18	15	3	0	95.903		2,4-dienoyl-CoA reductase, mitochondrial
Q99JY0	Hadhb	131	85	70	0	95.8341		Trifunctional enzyme subunit beta, mitochondrial
Q6PJN8	Dalrd3	1	1			95.7616		DALR anticodon-binding domain-containing protein 3
Q9CZ13	Uqcrc1	42	34	128	0	95.6448		Cytochrome b-c1 complex subunit 1, mitochondrial
Q9DCT2	Ndufs3	29	14	62	0	94.589		NADH dehydrogenase [ubiquinone] iron-sulfur protein 3, mitochondrial
Q9DCX1	Mad2l1bp	1	1			93.3646		MAD2L1-binding protein
Q9CQC7	Ndufb4	6	4	21	0	93.224		NADH dehydrogenase [ubiquinone] 1 beta subcomplex subunit 4
Q9DB77	Uqcrc2	194	117	176	0	92.8971		Cytochrome b-c1 complex subunit 2, mitochondrial
P00405	Mtco2	10	8	32	0	92.395		Cytochrome c oxidase subunit 2
P35486	Pdha1	5	2	86	0	91.6893		Pyruvate dehydrogenase E1 component subunit alpha, somatic form, mitochondrial
P19123	Tnnc1	8	6			89.8408		Troponin C, slow skeletal and cardiac muscles
P09542	Myl3	81	48			89.1886		Myosin light chain 3
P09541	Myl4	23	13			88.8541		Myosin light chain 4
Q8BH59	Slc25a12	10	10	175	0	88.4525		Calcium-binding mitochondrial carrier protein Aralar1
P48787	Tnni3	1	1			88.3057		Troponin I, cardiac muscle
P19536	Cox5b	5	3	35	0	88.2367		Cytochrome c oxidase subunit 5B, mitochondrial
Q07417	Acads	31	20	3	0	88.0073		Short-chain specific acyl-CoA dehydrogenase, mitochondrial
Q91VD9	Ndufs1	53	40	174	0	87.3889		NADH-ubiquinone oxidoreductase 75 kDa subunit, mitochondrial
Q9CR68	Uqcrfs1	39	34	45	0	86.9478		Cytochrome b-c1 complex subunit Rieske, mitochondrial
Q9D3D9	Atp5d	56	49	52	0	86.5531		ATP synthase subunit delta, mitochondrial
P13542	Myh8	125	67			85.0181		Myosin-8
Q9CR62	Slc25a11	13	7	61	0	82.9765		Mitochondrial 2-oxoglutarate/malate carrier protein
Q61772	Epha7	1	1			81.7194		Ephrin type-A receptor 7
P41216	Acsl1	22	5	11	0	81.2645		Long-chain-fatty-acid--CoA ligase 1
Q91YT0	Ndufv1	105	109	118	0	79.7222		NADH dehydrogenase [ubiquinone] flavoprotein 1, mitochondrial
Q9QXX4	Slc25a13	4	5	27	0	78.6757		Calcium-binding mitochondrial carrier protein Aralar2
Q5SX39	Myh4	124	56	2	0	76.0688		Myosin-4
Q62261	Sptbn1	14	1	607	0	75.1253		Spectrin beta chain, non-erythrocytic 1
Q60932	Vdac1	82	53	203	0	74.5218		Voltage-dependent anion-selective channel protein 1
Q9D6J6	Ndufv2	20	17	74	0	73.2475		NADH dehydrogenase [ubiquinone] flavoprotein 2, mitochondrial
Q91WD5	Ndufs2	31	23	79	0	70.999		NADH dehydrogenase [ubiquinone] iron-sulfur protein 2, mitochondrial
Q9CZU6	Cs	192	99	141	0	70.0867		Citrate synthase, mitochondrial
P16330	Cnp	15	1	158	0	68.9905		2',3'-cyclic-nucleotide 3'-phosphodiesterase
Q91VR2	Atp5c1	261	152	79	0	68.781		ATP synthase subunit gamma, mitochondrial
Q9CQ54	Ndufc2	7	4	5	0	68.0048		NADH dehydrogenase [ubiquinone] 1 subunit C2
P05202	Got2	79	10	302	0	67.9921		Aspartate aminotransferase, mitochondrial
P48962	Slc25a4	158	88	207	0	67.9567		ADP/ATP translocase 1
Q9DB20	Atp5o	13	2	93	0	63.1672		ATP synthase subunit O, mitochondrial
P56480	Atp5b	1185	600	474	1	62.1604	5.3646	ATP synthase subunit beta, mitochondrial
P56393	Cox7b	29	31			61.1731		Cytochrome c oxidase subunit 7B, mitochondrial
O08599	Stxbp1	5	2	221	0	60.8021		Syntaxin-binding protein 1
Q5SX40	Myh1	67	2	3	0	60.4317		Myosin-1
P45952	Acadm	25	8	21	0	57.0739		Medium-chain specific acyl-CoA dehydrogenase, mitochondrial
Q03265	Atp5a1	715	371	318	14	56.2882	9.48626	ATP synthase subunit alpha, mitochondrial
P69566	Ranbp9	3	1	2	0	51.6457		Ran-binding protein 9
P43277	Hist1h1d	28	1	91	0	50.5936		Histone H1.3
P97807	Fh	25	1	82	0	49.5308		Fumarate hydratase, mitochondrial
Q9JHI5	Ivd	14	3	49	0	48.0528		Isovaleryl-CoA dehydrogenase, mitochondrial
P51881	Slc25a5	135	63	199	0	47.6474		ADP/ATP translocase 2
Q99LC3	Ndufa10	62	53	38	0	45.2685		NADH dehydrogenase [ubiquinone] 1 alpha subcomplex subunit 10, mitochondrial
P63268	Actg2	272	61	273	0	44.1318		Actin, gamma-enteric smooth muscle
P68033	Actc1	295	61	294	0	44.1318		Actin, alpha cardiac muscle 1
P68134	Acta1	295	61	291	0	44.1318		Actin, alpha skeletal muscle
P20108	Prdx3	42	27	40	0	43.411		Thioredoxin-dependent peroxide reductase, mitochondrial
P62737	Acta2	275	61	274	0	42.9253		Actin, aortic smooth muscle
Q9D0M3	Cyc1	14	4	58	0	40.1815		Cytochrome c1, heme protein, mitochondrial
P61264	Stx1b	8	2	187	0	36.2236		Syntaxin-1B
P13541	Myh3	44	13	2	0	35.3516		Myosin-3
Q0KL02	Trio	1	1	3	0	34.2142		Triple functional domain protein
Q9DCX2	Atp5h	13	4	93	0	32.3397		ATP synthase subunit d, mitochondrial
Q9DC69	Ndufa9	26	11	32	0	32.2393		NADH dehydrogenase [ubiquinone] 1 alpha subcomplex subunit 9, mitochondrial
Q6PIE5	Atp1a2	58	1	623	0	32.1398		Sodium/potassium-transporting ATPase subunit alpha-2
Q6PIC6	Atp1a3	79	1	747	0	31.742		Sodium/potassium-transporting ATPase subunit alpha-3
P17710	Hk1	4	1	235	0	29.0759		Hexokinase-1
Q8BFZ3	Actbl2	123	12	185	0	28.3379		Beta-actin-like protein 2
Q06185	Atp5i	10	1	31	0	26.9016		ATP synthase subunit e, mitochondrial
Q9DCS9	Ndufb10	10	2	15	0	25.147		NADH dehydrogenase [ubiquinone] 1 beta subcomplex subunit 10
Q9CQQ7	Atp5f1	13	5	53	0	24.4606		ATP synthase F(0) complex subunit B1, mitochondrial
Q9JI91	Actn2	20	1	73	0	22.4486		Alpha-actinin-2
Q8VDN2	Atp1a1	84	1	586	0	20.0536		Sodium/potassium-transporting ATPase subunit alpha-1
P08249	Mdh2	152	3	301	0	19.3682		Malate dehydrogenase, mitochondrial
Q8BWT1	Acaa2	22	1	22	0	17.0169		3-ketoacyl-CoA thiolase, mitochondrial
P01942	Hba	195	29	94	2	15.6838	9.93955	Hemoglobin subunit alpha
Q8R404	Qil1	3	1			14.0886		Protein QIL1
P04247	Mb	67	35			14.0238		Myoglobin
Q9D6R2	Idh3a	22	2	162	0	13.6014		Isocitrate dehydrogenase [NAD] subunit alpha, mitochondrial
P54071	Idh2	34	18	38	0	13.134		Isocitrate dehydrogenase [NADP], mitochondrial
P52825	Cpt2	26	2	7	0	11.3286		Carnitine O-palmitoyltransferase 2, mitochondrial
O55143	Atp2a2	48	1	126	0	11.0104		Sarcoplasmic/endoplasmic reticulum calcium ATPase 2
O08749	Dld	34	1	123	0	10.9772		Dihydrolipoyl dehydrogenase, mitochondrial
Q3V132	Slc25a31	27	1	37	0	10.8887		ADP/ATP translocase 4
O35129	Phb2	43	14	58	0	10.5724		Prohibitin-2
P68369	Tuba1a	330	15	906	0	10.4289		Tubulin alpha-1A chain
P62806	Hist1h4a	91	8	131	1	10.3238	2.28068	Histone H4
P68373	Tuba1c	378	15	785	0	9.66392		Tubulin alpha-1C chain
Q8CAQ8	Immt	73	5	143	0	9.43974		Mitochondrial inner membrane protein
P05213	Tuba1b	369	15	898	0	8.76538		Tubulin alpha-1B chain
Q60597	Ogdh	70	7	86	0	8.71647		2-oxoglutarate dehydrogenase, mitochondrial
P46735	Myo1b	61	1	17	0	8.57528		Unconventional myosin-Ib
P10853	Hist1h2bf	48	1	41	0	8.51183		Histone H2B type 1-F/J/L
P10854	Hist1h2bm	48	1	41	0	8.51183		Histone H2B type 1-M
Q64475	Hist1h2bb	48	1	41	0	8.51183		Histone H2B type 1-B
Q64478	Hist1h2bh	48	1	41	0	8.51183		Histone H2B type 1-H
Q64525	Hist2h2bb	48	1	41	0	8.51183		Histone H2B type 2-B
Q6ZWY9	Hist1h2bc	48	1	41	0	8.51183		Histone H2B type 1-C/E/G
Q8CGP1	Hist1h2bk	48	1	41	0	8.51183		Histone H2B type 1-K
Q8CGP2	Hist1h2bp	48	1	41	0	8.51183		Histone H2B type 1-P
Q9D6F9	Tubb4a	69	1	691	0	8.49764		Tubulin beta-4A chain
A2ASS6	Ttn	2	2			8.33836		Titin
P60710	Actb	400	18	582	0	8.13478		Actin, cytoplasmic 1
P63260	Actg1	400	18	582	0	8.13478		Actin, cytoplasmic 2
P05214	Tuba3a	259	3	634	0	7.88731		Tubulin alpha-3 chain
P16858	Gapdh	209	4	384	0	7.74963		Glyceraldehyde-3-phosphate dehydrogenase
Q9D051	Pdhb	28	16	138	0	7.50498		Pyruvate dehydrogenase E1 component subunit beta, mitochondrial
Q3U1J4	Ddb1	144	1	33	0	7.16158		DNA damage-binding protein 1
Q99KI0	Aco2	87	2	430	0	7.11055		Aconitate hydratase, mitochondrial
Q61425	Hadh	9	5	3	0	6.91419		Hydroxyacyl-coenzyme A dehydrogenase, mitochondrial
P18760	Cfl1	91	1	128	0	6.89019		Cofilin-1
Q8QZT1	Acat1	40	1	124	0	6.69612		Acetyl-CoA acetyltransferase, mitochondrial
Q9JJZ2	Tuba8	197	1	462	0	6.5164		Tubulin alpha-8 chain
P68368	Tuba4a	265	1	692	0	6.33198		Tubulin alpha-4A chain
P45591	Cfl2	55	1	44	0	6.05388		Cofilin-2
Q9Z2I9	Sucla2	18	1	119	0	5.74536		Succinyl-CoA ligase [ADP-forming] subunit beta, mitochondrial
P02088	Hbb-b1	251	4	169	0	5.44548		Hemoglobin subunit beta-1
P61982	Ywhag	134	7	194	0	5.19487		14-3-3 protein gamma
P63038	Hspd1	132	4	197	0	4.69372		60 kDa heat shock protein, mitochondrial
P22752	Hist1h2ab	320	4	96	0	4.60044		Histone H2A type 1
Q8BFU2	Hist3h2a	320	4	96	0	4.60044		Histone H2A type 3
Q8CGP5	Hist1h2af	320	4	96	0	4.60044		Histone H2A type 1-F
Q8CGP6	Hist1h2ah	320	4	96	0	4.60044		Histone H2A type 1-H
Q8CGP7	Hist1h2ak	320	4	96	0	4.60044		Histone H2A type 1-K
Q8R1M2	H2afj	320	4	96	0	4.60044		Histone H2A.J
P27661	H2afx	323	4	91	0	4.45776		Histone H2AX
O35459	Ech1	2	3			4.43441		Delta(3,5)-Delta(2,4)-dienoyl-CoA isomerase, mitochondrial
Q64467	Gapdhs	51	2	124	0	3.76684		Glyceraldehyde-3-phosphate dehydrogenase, testis-specific
P38647	Hspa9	193	7	163	0	3.41574		Stress-70 protein, mitochondrial
P0C0S6	H2afz	173	1	67	0	2.53968		Histone H2A.Z
Q3THW5	H2afv	173	1	67	0	2.53968		Histone H2A.V
P07724	Alb	622	1	190	0	2.35595		Serum albumin
Q9CPX8	Uqcr11	6	5	2	0	1.35033		Cytochrome b-c1 complex subunit 10
Q64522	Hist2h2ab	314	2	90	0	1.27468		Histone H2A type 2-B
O55126	Gbas	21	1	38	0	1.25522		Protein NipSnap homolog 2
Q64523	Hist2h2ac	311	2	100	0	1.25296		Histone H2A type 2-C
Q6GSS7	Hist2h2aa1	311	2	100	0	1.25296		Histone H2A type 2-A
O88441	Mtx2	4	1	7	0	1.09594		Metaxin-2
Q6GQW0	Btbd11			1	1		99.5322	Ankyrin repeat and BTB/POZ domain-containing protein BTBD11
Q3UZB0	Armcx5			1	1		95.3171	Armadillo repeat-containing X-linked protein 5
P97868	Rbbp6			1	1		93.2958	E3 ubiquitin-protein ligase RBBP6
Q8JZW8	Pnma3			1	1		85.8266	Paraneoplastic antigen Ma3 homolog
Q9CZV8	Fbxl20			2	1		69.7686	F-box/LRR-repeat protein 20
P70704	Atp8a1			10	1		62.9186	Probable phospholipid-transporting ATPase IA
Q9Z1Z2	Strap	22	0	37	1		43.8808	Serine-threonine kinase receptor-associated protein
P17047	Lamp2			2	1		24.9905	Lysosome-associated membrane glycoprotein 2
Q6P5F9	Xpo1	16	0	11	1		7.66123	Exportin-1
P04370	Mbp	46	0	119	2		2.25047	Myelin basic protein
Q8R1I1	Uqcr10	14	7	21	0			Cytochrome b-c1 complex subunit 9
Q9CPP6	Ndufa5	1	1	7	0			NADH dehydrogenase [ubiquinone] 1 alpha subcomplex subunit 5
Q9CXV1	Sdhd	2	2	2	0			Succinate dehydrogenase [ubiquinone] cytochrome b small subunit, mitochondrial
Q9DCJ5	Ndufa8	4	2	29	0			NADH dehydrogenase [ubiquinone] 1 alpha subcomplex subunit 8
Q9Z0E0	Ncdn	1	1	84	0			Neurochondrin
P54923	Adprh	4	0	2	0			[Protein ADP-ribosylarginine] hydrolase
A0JP43	Efcab5			2	0			EF-hand calcium-binding domain-containing protein 5
A1KXC4	Faim3			1	0			Fas apoptotic inhibitory molecule 3
A2A432	Cul4b	83	0	9	0			Cullin-4B
A2A559	Pgap3			3	0			Post-GPI attachment to proteins factor 3
A2A5R2	Arfgef2	1	0	2	0			Brefeldin A-inhibited guanine nucleotide-exchange protein 2
A2A699	Fam171a2	1	0					Protein FAM171A2
A2A6A1	Gpatch8			1	0			G patch domain-containing protein 8
A2A7Q9	Rnf19b			1	0			E3 ubiquitin-protein ligase RNF19B
A2A7Z8	Aadacl3	1	1					Arylacetamide deacetylase-like 3
A2A8L5	Ptprf	1	0					Receptor-type tyrosine-protein phosphatase F
A2A8Z1	Osbpl9	1	0					Oxysterol-binding protein-related protein 9
A2A935	Prdm16			1	0			PR domain zinc finger protein 16
A2A9Q0	2			1	0			Fibronectin type-III domain-containing transmembrane protein C1orf233 homolog
A2AAJ9	Obscn			0	1			Obscurin
A2ADY9	Ddi2	4	0	6	0			Protein DDI1 homolog 2
A2AEY4	Map7d3			1	0			MAP7 domain-containing protein 3
A2AG50	Map7d2			1	0			MAP7 domain-containing protein 2
A2AGL3	Ryr3			1	0			Ryanodine receptor 3
A2AGT5	Ckap5	14	0	20	0			Cytoskeleton-associated protein 5
A2AHC3	Camsap1			1	0			Calmodulin-regulated spectrin-associated protein 1
A2AIL4	Ndufaf6	1	0					NADH dehydrogenase (ubiquinone) complex I, assembly factor 6
A2AJI0	Map7d1			3	0			MAP7 domain-containing protein 1
A2AKG8	Focad	8	0					Focadhesin
A2AL36	Cntrl			12	0			Centriolin
A2ALS5	Rap1gap			9	0			Rap1 GTPase-activating protein 1
A2ALU4	Shroom2			2	0			Protein Shroom2
A2AM05	Cntln	3	0					Centlein
A2AN08	Ubr4	19	0	9	0			E3 ubiquitin-protein ligase UBR4
A2APV2	Fmnl2	7	0	2	0			Formin-like protein 2
A2AQ07	Tubb1	11	0	130	0			Tubulin beta-1 chain
A2AQ25	Skt			2	0			Sickle tail protein
A2AQP0	Myh7b	5	0					Myosin-7B
A2ARP1	Ppip5k1	1	0					Inositol hexakisphosphate and diphosphoinositol-pentakisphosphate kinase 1
A2AVJ5	Prr5l	1	0					Proline-rich protein 5-like
A2AWA9	Rabgap1	8	0	1	0			Rab GTPase-activating protein 1
A2BE28	Las1l	1	0					Ribosomal biogenesis protein LAS1L
A2CG49	Kalrn			2	0			Kalirin
A2RT62	Fbxl16			1	0			F-box/LRR-repeat protein 16
A2TJV2	Palm3	1	0	1	0			Paralemmin-3
A3KGF7	Plcb2			2	0			1-phosphatidylinositol 4,5-bisphosphate phosphodiesterase beta-2
A3KMP2	Ttc38	7	0	1	0			Tetratricopeptide repeat protein 38
A6H5Y3	Mtr	3	0					Methionine synthase
A6H8H5	Kcnb2			1	0			Potassium voltage-gated channel subfamily B member 2
A6PWY4	Wdr76			1	0			WD repeat-containing protein 76
B0F2B4	Nlgn4l			2	1			Neuroligin 4-like
B0V2N1	Ptprs	0	1	4	0			Receptor-type tyrosine-protein phosphatase S
B1AZP2	Dlgap4	8	0	8	0			Disks large-associated protein 4
B2RR83	Ythdc2	2	0					Probable ATP-dependent RNA helicase YTHDC2
B2RRE7	Otud4	1	0					OTU domain-containing protein 4
B2RSH2	Gnai1	1	0	78	0			Guanine nucleotide-binding protein G(i) subunit alpha-1
B2RU80	Ptprb			2	0			Receptor-type tyrosine-protein phosphatase beta
B2RUI1	Znf551			2	0			Zinc finger protein 551
B2RX88	Cspp1	1	0					Centrosome and spindle pole associated protein 1
B2RXC1	Trappc11	4	0	1	0			Trafficking protein particle complex subunit 11
B2RXR6	Ankrd44	6	0					Serine/threonine-protein phosphatase 6 regulatory ankyrin repeat subunit B
B2RXS4	Plxnb2	33	0	7	0			Plexin-B2
B2RY04	Dock5			1	0			Dedicator of cytokinesis protein 5
B2RY56	Rbm25	2	0					RNA-binding protein 25
B5X0G2	Mup17	5	0	4	0			Major urinary protein 17
B9EJA2	Cttnbp2			4	0			Cortactin-binding protein 2
B9EKR1	Ptprz1			33	0			Receptor-type tyrosine-protein phosphatase zeta
C0LLJ0	Kpna7	1	0	2	0			Importin subunit alpha-8
C3VPR6	Nlrc5			0	1			Protein NLRC5
C8YR32	Loxhd1			1	0			Lipoxygenase homology domain-containing protein 1
D3YVF0	Akap5			12	0			A-kinase anchor protein 5
D3YXK2	Safb	2	0	33	0			Scaffold attachment factor B1
D3YZP9	Ccdc6	14	0					Coiled-coil domain-containing protein 6
D3YZU1	Shank1			3	0			SH3 and multiple ankyrin repeat domains protein 1
D3Z4I3	Rbm24	5	0					RNA-binding protein 24
D3Z4S3	Ptrhd1	1	0					Putative peptidyl-tRNA hydrolase PTRHD1
D3Z6Q9	Bin2	3	0	2	0			Bridging integrator 2
D3Z7P3	Gls			68	0			Glutaminase kidney isoform, mitochondrial
E9PUL5	Prrt2			24	0			Proline-rich transmembrane protein 2
E9PZJ8	Ascc3	1	1	1	0			Activating signal cointegrator 1 complex subunit 3
E9PZM4	Chd2	1	0					Chromodomain-helicase-DNA-binding protein 2
E9PZQ0	Ryr1			1	0			Ryanodine receptor 1
E9Q401	Ryr2			8	0			Ryanodine receptor 2
E9Q414	Apob	4	0					Apolipoprotein B-100
E9Q557	Dsp	558	0	284	0			Desmoplakin
E9Q5G3	Kif23	7	0					Kinesin-like protein KIF23
E9Q634	Myo1e	3	0					Unconventional myosin-Ie
E9Q8I9	Fry			2	0			Protein furry homolog
F6SEU4	Syngap1			33	0			Ras/Rap GTPase-activating protein SynGAP
F6ZDS4	Tpr	1	0	7	0			Nucleoprotein TPR
F7A4A7	Otogl			1	0			Otogelin-like protein
F8VPU2	Farp1			13	0			FERM, RhoGEF and pleckstrin domain-containing protein 1
F8VQB6	Myo10	3	0	2	0			Unconventional myosin-X
G3X9C2	Nccrp1	9	0	2	0			F-box only protein 50
G3X9K3	Arfgef1	2	0	1	0			Brefeldin A-inhibited guanine nucleotide-exchange protein 1
G3XA57	Rab11fip2			1	0			Rab11 family-interacting protein 2
G5E870	Trip12	4	0					E3 ubiquitin-protein ligase TRIP12
G5E8K5	Ank3			32	0			Ankyrin-3
O08528	Hk2	1	0	27	0			Hexokinase-2
O08529	Capn2	3	0	8	0			Calpain-2 catalytic subunit
O08530	S1pr1			1	0			Sphingosine 1-phosphate receptor 1
O08532	Cacna2d1	1	0	63	0			Voltage-dependent calcium channel subunit alpha-2/delta-1
O08539	Bin1	2	0	25	0			Myc box-dependent-interacting protein 1
O08547	Sec22b	7	0	14	0			Vesicle-trafficking protein SEC22b
O08553	Dpysl2	86	0	505	0			Dihydropyrimidinase-related protein 2
O08579	Emd			10	0			Emerin
O08582	Gtpbp1			4	0			GTP-binding protein 1
O08583	Alyref	1	0	21	0			THO complex subunit 4
O08585	Clta	4	0	24	0			Clathrin light chain A
O08601	Mttp	1	0					Microsomal triglyceride transfer protein large subunit
O08638	Myh11	70	0	58	0			Myosin-11
O08648	Map3k4	1	0					Mitogen-activated protein kinase kinase kinase 4
O08663	Metap2	4	0	3	0			Methionine aminopeptidase 2
O08672	Kifc2			1	0			Kinesin-like protein KIFC2
O08677	Kng1	4	0					Kininogen-1
O08688	Capn5			1	0			Calpain-5
O08691	Arg2	34	0	10	0			Arginase-2, mitochondrial
O08709	Prdx6	31	0	137	0			Peroxiredoxin-6
O08715	Akap1	26	0	5	0			A-kinase anchor protein 1, mitochondrial
O08756	Hsd17b10	37	0	20	0			3-hydroxyacyl-CoA dehydrogenase type-2
O08759	Ube3a	4	0	3	0			Ubiquitin-protein ligase E3A
O08784	Tcof1	0	1					Treacle protein
O08788	Dctn1	18	0	60	0			Dynactin subunit 1
O08795	Prkcsh	10	0	4	0			Glucosidase 2 subunit beta
O08796	Eef2k	6	0	4	0			Eukaryotic elongation factor 2 kinase
O08807	Prdx4	7	0	19	0			Peroxiredoxin-4
O08808	Diaph1	19	0	3	0			Protein diaphanous homolog 1
O08810	Eftud2	11	0	12	0			116 kDa U5 small nuclear ribonucleoprotein component
O08859	Tnfaip6	1	0					Tumor necrosis factor-inducible gene 6 protein
O08901	Bub1	2	0					Mitotic checkpoint serine/threonine-protein kinase BUB1
O08908	Pik3r2	3	0	2	0			Phosphatidylinositol 3-kinase regulatory subunit beta
O08911	Mapk12	2	0					Mitogen-activated protein kinase 12
O08914	Faah	6	0					Fatty-acid amide hydrolase 1
O08915	Aip	1	0					AH receptor-interacting protein
O08967	Cyth3			1	0			Cytohesin-3
O08989	Mras			1	0			Ras-related protein M-Ras
O08992	Sdcbp	1	0					Syntenin-1
O08997	Atox1	12	0	3	0			Copper transport protein ATOX1
O09005	Degs1	1	0					Sphingolipid delta(4)-desaturase DES1
O09012	Pex5	5	0					Peroxisomal targeting signal 1 receptor
O09044	Snap23	3	0	12	0			Synaptosomal-associated protein 23
O09061	Psmb1	17	0	42	0			Proteasome subunit beta type-1
O09106	Hdac1	1	0	1	0			Histone deacetylase 1
O09111	Ndufb11			9	0			NADH dehydrogenase [ubiquinone] 1 beta subcomplex subunit 11, mitochondrial
O09114	Ptgds	7	0	20	0			Prostaglandin-H2 D-isomerase
O09131	Gsto1	6	0	2	0			Glutathione S-transferase omega-1
O09165	Casq1	4	0	4	0			Calsequestrin-1
O09167	Rpl21	5	0	3	0			60S ribosomal protein L21
O09172	Gclm	6	0	2	0			Glutamate--cysteine ligase regulatory subunit
O09174	Amacr	1	0					Alpha-methylacyl-CoA racemase
O35083	Agpat1			1	0			1-acyl-sn-glycerol-3-phosphate acyltransferase alpha
O35098	Dpysl4			62	0			Dihydropyrimidinase-related protein 4
O35114	Scarb2			2	0			Lysosome membrane protein 2
O35127	Grcc10	1	0	1	0			Protein C10
O35130	Emg1	1	0					Ribosomal RNA small subunit methyltransferase NEP1
O35136	Ncam2			29	0			Neural cell adhesion molecule 2
O35137	Alx4			1	0			Homeobox protein aristaless-like 4
O35166	Gosr2	1	0					Golgi SNAP receptor complex member 2
O35206	Col15a1	1	0					Collagen alpha-1(XV) chain
O35215	Ddt	17	0	22	0			D-dopachrome decarboxylase
O35218	Cpsf2	3	0					Cleavage and polyadenylation specificity factor subunit 2
O35226	Psmd4	1	0	13	0			26S proteasome non-ATPase regulatory subunit 4
O35280	Chek1	1	0					Serine/threonine-protein kinase Chk1
O35286	Dhx15	7	0	18	0			Putative pre-mRNA-splicing factor ATP-dependent RNA helicase DHX15
O35295	Purb	1	0	19	0			Transcriptional activator protein Pur-beta
O35326	Srsf5			9	0			Serine/arginine-rich splicing factor 5
O35343	Kpna4	1	0					Importin subunit alpha-3
O35344	Kpna3			2	0			Importin subunit alpha-4
O35345	Kpna6	5	0	6	0			Importin subunit alpha-7
O35350	Capn1	10	0	3	0			Calpain-1 catalytic subunit
O35368	Ifi203	1	0					Interferon-activable protein 203
O35375	Nrp2			2	0			Neuropilin-2
O35379	Abcc1	2	0					Multidrug resistance-associated protein 1
O35381	Anp32a	52	0	28	0			Acidic leucine-rich nuclear phosphoprotein 32 family member A
O35382	Exoc4	1	0	2	0			Exocyst complex component 4
O35405	Pld3	3	0	3	0			Phospholipase D3
O35409	Folh1	2	0					Glutamate carboxypeptidase 2
O35435	Dhodh	12	0	1	0			Dihydroorotate dehydrogenase (quinone), mitochondrial
O35449	Prrt1			3	0			Proline-rich transmembrane protein 1
O35465	Fkbp8	1	0	5	0			Peptidyl-prolyl cis-trans isomerase FKBP8
O35526	Stx1a			54	0			Syntaxin-1A
O35544	Slc1a6			10	0			Excitatory amino acid transporter 4
O35551	Rabep1	1	0					Rab GTPase-binding effector protein 1
O35593	Psmd14	1	0	7	0			26S proteasome non-ATPase regulatory subunit 14
O35598	Adam10	1	0					Disintegrin and metalloproteinase domain-containing protein 10
O35609	Scamp3	3	0	21	0			Secretory carrier-associated membrane protein 3
O35618	Mdm4	3	0					Protein Mdm4
O35621	Pmm1			4	0			Phosphomannomutase 1
O35633	Slc32a1			23	0			Vesicular inhibitory amino acid transporter
O35639	Anxa3			4	0			Annexin A3
O35640	Anxa8	2	0					Annexin A8
O35643	Ap1b1	50	0	99	0			AP-1 complex subunit beta-1
O35652	Lhx8	0	1					LIM/homeobox protein Lhx8
O35654	Pold2	1	0					DNA polymerase delta subunit 2
O35658	C1qbp	1	0	18	0			Complement component 1 Q subcomponent-binding protein, mitochondrial
O35660	Gstm6	7	0	6	0			Glutathione S-transferase Mu 6
O35674	Adam19			0	1			Disintegrin and metalloproteinase domain-containing protein 19
O35678	Mgll			7	0			Monoglyceride lipase
O35682	Myadm			1	0			Myeloid-associated differentiation marker
O35683	Ndufa1			1	0			NADH dehydrogenase [ubiquinone] 1 alpha subcomplex subunit 1
O35684	Serpini1			3	0			Neuroserpin
O35685	Nudc	24	0	17	0			Nuclear migration protein nudC
O35711	Ppfibp2	4	0					Liprin-beta-2
O35737	Hnrnph1	19	0	60	0			Heterogeneous nuclear ribonucleoprotein H
O35744	Chil3	10	0					Chitinase-like protein 3
O35841	Api5			13	0			Apoptosis inhibitor 5
O35857	Timm44	12	0	5	0			Mitochondrial import inner membrane translocase subunit TIM44
O35864	Cops5	13	0	4	0			COP9 signalosome complex subunit 5
O35874	Slc1a4			13	0			Neutral amino acid transporter A
O35887	Calu	5	0	3	0			Calumenin
O35900	Lsm2	10	0					U6 snRNA-associated Sm-like protein LSm2
O35904	Pik3cd	8	0	1	0			Phosphatidylinositol 4,5-bisphosphate 3-kinase catalytic subunit delta isoform
O35914	Bnc1	1	0					Zinc finger protein basonuclin-1
O35927	Ctnnd2			9	0			Catenin delta-2
O35936	Alox8			1	0			Arachidonate 8S-lipoxygenase
O35943	Fxn	2	0					Frataxin, mitochondrial
O35945	Aldh1a7	3	0	1	0			Aldehyde dehydrogenase, cytosolic 1
O35954	Pitpnm1			1	0			Membrane-associated phosphatidylinositol transfer protein 1
O35955	Psmb10	1	0					Proteasome subunit beta type-10
O35963	Rab33b	1	0	1	0			Ras-related protein Rab-33B
O54692	Zw10	13	0	2	0			Centromere/kinetochore protein zw10 homolog
O54732	Mmp15	1	0					Matrix metalloproteinase-15
O54734	Ddost	10	0	31	0			Dolichyl-diphosphooligosaccharide--protein glycosyltransferase 48 kDa subunit
O54774	Ap3d1	3	0	20	0			AP-3 complex subunit delta-1
O54819	Tfpi	1	0					Tissue factor pathway inhibitor
O54829	Rgs7			31	0			Regulator of G-protein signaling 7
O54833	Csnk2a2	2	0					Casein kinase II subunit alpha'
O54865	Gucy1b3			3	0			Guanylate cyclase soluble subunit beta-1
O54879	Hmgb3			12	0			High mobility group protein B3
O54940	Bnip2			2	0			BCL2/adenovirus E1B 19 kDa protein-interacting protein 2
O54946	Dnajb6	3	0	5	0			DnaJ homolog subfamily B member 6
O54950	Prkag1	1	0	1	0			5'-AMP-activated protein kinase subunit gamma-1
O54962	Banf1			1	0			Barrier-to-autointegration factor
O54983	Crym	1	0	6	0			Ketimine reductase mu-crystallin
O54984	Asna1	14	0	5	0			ATPase Asna1
O54988	Slk	1	0	3	0			STE20-like serine/threonine-protein kinase
O54991	Cntnap1			6	0			Contactin-associated protein 1
O55013	Trappc3			7	0			Trafficking protein particle complex subunit 3
O55017	Cacna1b	1	1					Voltage-dependent N-type calcium channel subunit alpha-1B
O55022	Pgrmc1			21	0			Membrane-associated progesterone receptor component 1
O55023	Impa1	7	0	27	0			Inositol monophosphatase 1
O55026	Entpd2	3	0					Ectonucleoside triphosphate diphosphohydrolase 2
O55029	Copb2	20	0	16	0			Coatomer subunit beta'
O55042	Snca			127	0			Alpha-synuclein
O55057	Pde6d			1	0			Retinal rod rhodopsin-sensitive cGMP 3',5'-cyclic phosphodiesterase subunit delta
O55060	Tpmt	27	0	3	0			Thiopurine S-methyltransferase
O55074	Akap7			1	0			A-kinase anchor protein 7 isoform alpha
O55091	Impact			2	0			Protein IMPACT
O55100	Syngr1			27	0			Synaptogyrin-1
O55106	Strn	11	0	1	0			Striatin
O55125	Nipsnap1	4	0	39	0			Protein NipSnap homolog 1
O55131	45176	15	0	75	0			Septin-7
O55135	Eif6	23	0	1	0			Eukaryotic translation initiation factor 6
O55137	Acot1			6	0			Acyl-coenzyme A thioesterase 1
O55142	Rpl35a	2	0	2	0			60S ribosomal protein L35a
O55226	Chad	1	0					Chondroadherin
O55234	Psmb5	19	0	68	0			Proteasome subunit beta type-5
O70133	Dhx9	16	0	51	0			ATP-dependent RNA helicase A
O70152	Dpm1	4	0	1	0			Dolichol-phosphate mannosyltransferase subunit 1
O70161	Pip5k1c			28	0			Phosphatidylinositol 4-phosphate 5-kinase type-1 gamma
O70172	Pip4k2a			29	0			Phosphatidylinositol 5-phosphate 4-kinase type-2 alpha
O70194	Eif3d	7	0	1	0			Eukaryotic translation initiation factor 3 subunit D
O70209	Pdlim3	1	0					PDZ and LIM domain protein 3
O70218	Hmx1	1	0					Homeobox protein HMX1
O70228	Atp9a			2	0			Probable phospholipid-transporting ATPase IIA
O70250	Pgam2	36	0	33	0			Phosphoglycerate mutase 2
O70251	Eef1b	6	0	4	0			Elongation factor 1-beta
O70252	Hmox2	4	0	2	0			Heme oxygenase 2
O70274	Ptp4a2	2	0					Protein tyrosine phosphatase type IVA 2
O70305	Atxn2			1	0			Ataxin-2
O70309	Itgb5	3	0	1	0			Integrin beta-5
O70310	Nmt1			2	0			Glycylpeptide N-tetradecanoyltransferase 1
O70311	Nmt2			1	0			Glycylpeptide N-tetradecanoyltransferase 2
O70318	Epb41l2	11	0	37	0			Band 4.1-like protein 2
O70325	Gpx4	7	0	2	0			Phospholipid hydroperoxide glutathione peroxidase, mitochondrial
O70378	Emc8			2	0			ER membrane protein complex subunit 8
O70400	Pdlim1	2	0					PDZ and LIM domain protein 1
O70401	Tspan6	2	0	1	0			Tetraspanin-6
O70404	Vamp8	1	0					Vesicle-associated membrane protein 8
O70435	Psma3	9	0	24	0			Proteasome subunit alpha type-3
O70439	Stx7	2	0	15	0			Syntaxin-7
O70443	Gnaz			19	0			Guanine nucleotide-binding protein G(z) subunit alpha
O70456	Sfn	17	0	38	0			14-3-3 protein sigma
O70472	Tmem131			2	0			Transmembrane protein 131
O70475	Ugdh	4	0					UDP-glucose 6-dehydrogenase
O70480	Vamp4	3	0					Vesicle-associated membrane protein 4
O70492	Snx3	11	0	24	0			Sorting nexin-3
O70493	Snx12	2	0	23	0			Sorting nexin-12
O70503	Hsd17b12			3	0			Estradiol 17-beta-dehydrogenase 12
O70552	Btg4	0	1					Protein BTG4
O70570	Pigr	1	0					Polymeric immunoglobulin receptor
O70579	Slc25a17	2	0					Peroxisomal membrane protein PMP34
O70582	Alox12b	1	0	5	0			Arachidonate 12-lipoxygenase, 12R-type
O70589	Cask			5	0			Peripheral plasma membrane protein CASK
O70591	Pfdn2	4	0	2	0			Prefoldin subunit 2
O88196	Ttc3	1	0	1	0			E3 ubiquitin-protein ligase TTC3
O88271	Cfdp1			2	0			Craniofacial development protein 1
O88312	Agr2	2	0					Anterior gradient protein 2 homolog
O88329	Myo1a	6	0	1	0			Unconventional myosin-Ia
O88342	Wdr1	46	0	76	0			WD repeat-containing protein 1
O88343	Slc4a4			52	0			Electrogenic sodium bicarbonate cotransporter 1
O88346	Tnnt1	1	0					Troponin T, slow skeletal muscle
O88384	Vti1b	1	0					Vesicle transport through interaction with t-SNAREs homolog 1B
O88413	Tulp3	5	0					Tubby-related protein 3
O88445	Aurkc	1	0					Aurora kinase C
O88447	Klc1	1	0	14	0			Kinesin light chain 1
O88448	Klc2			3	0			Kinesin light chain 2
O88456	Capns1	2	0	2	0			Calpain small subunit 1
O88485	Dync1i1			8	0			Cytoplasmic dynein 1 intermediate chain 1
O88487	Dync1i2	6	0	2	0			Cytoplasmic dynein 1 intermediate chain 2
O88492	Plin4	1	0					Perilipin-4
O88508	Dnmt3a	6	0					DNA (cytosine-5)-methyltransferase 3A
O88531	Ppt1	2	0	7	0			Palmitoyl-protein thioesterase 1
O88532	Zfr	0	1					Zinc finger RNA-binding protein
O88543	Cops3	1	0	1	0			COP9 signalosome complex subunit 3
O88544	Cops4	37	0	32	0			COP9 signalosome complex subunit 4
O88545	Cops6	11	0	8	0			COP9 signalosome complex subunit 6
O88559	Men1	3	0					Menin
O88569	Hnrnpa2b1	31	0	182	0			Heterogeneous nuclear ribonucleoproteins A2/B1
O88597	Becn1	2	0					Beclin-1
O88609	Lmx1b			1	0			LIM homeobox transcription factor 1-beta
O88622	Parg	1	0					Poly(ADP-ribose) glycohydrolase
O88630	Gosr1	1	0					Golgi SNAP receptor complex member 1
O88643	Pak1	4	0	77	0			Serine/threonine-protein kinase PAK 1
O88685	Psmc3	5	0	5	0			26S protease regulatory subunit 6A
O88696	Clpp	4	0					Putative ATP-dependent Clp protease proteolytic subunit, mitochondrial
O88703	Hcn2			1	0			Potassium/sodium hyperpolarization-activated cyclic nucleotide-gated channel 2
O88712	Ctbp1			19	0			C-terminal-binding protein 1
O88736	Hsd17b7	14	0	1	0			3-keto-steroid reductase
O88737	Bsn			57	0			Protein bassoon
O88738	Birc6			1	0			Baculoviral IAP repeat-containing protein 6
O88741	Gdap1	1	0	17	0			Ganglioside-induced differentiation-associated protein 1
O88746	Tom1			13	0			Target of Myb protein 1
O88809	Dcx			4	0			Neuronal migration protein doublecortin
O88844	Idh1	17	0	75	0			Isocitrate dehydrogenase [NADP] cytoplasmic
O88851	Rbbp9			9	0			Putative hydrolase RBBP9
O88935	Syn1			343	0			Synapsin-1
O88951	Lin7b			6	0			Protein lin-7 homolog B
O88952	Lin7c			15	0			Protein lin-7 homolog C
O88958	Gnpda1			2	0			Glucosamine-6-phosphate isomerase 1
O88983	Stx8	4	0					Syntaxin-8
O88986	Gcat	16	0					2-amino-3-ketobutyrate coenzyme A ligase, mitochondrial
O88990	Actn3	19	0	78	0			Alpha-actinin-3
O88998	Olfm1			7	0			Noelin
O89017	Lgmn	1	0	2	0			Legumain
O89051	Itm2b	21	0					Integral membrane protein 2B
O89053	Coro1a	2	0	30	0			Coronin-1A
O89079	Cope	6	0	1	0			Coatomer subunit epsilon
O89084	Pde4a			7	0			cAMP-specific 3',5'-cyclic phosphodiesterase 4A
O89106	Fhit	7	0					Bis(5'-adenosyl)-triphosphatase
O89112	Lancl1	6	0	6	0			LanC-like protein 1
O89114	Dnajb5			1	0			DnaJ homolog subfamily B member 5
O89116	Vti1a	4	0	3	0			Vesicle transport through interaction with t-SNAREs homolog 1A
P00329	Adh1	1	0					Alcohol dehydrogenase 1
P00342	Ldhc	94	0	51	0			L-lactate dehydrogenase C chain
P00375	Dhfr	1	0					Dihydrofolate reductase
P00397	Mtco1			4	0			Cytochrome c oxidase subunit 1
P00493	Hprt1	5	0	40	0			Hypoxanthine-guanine phosphoribosyltransferase
P00687	Amy1	1	0					Alpha-amylase 1
P00688	Amy2	6	0					Pancreatic alpha-amylase
P00848	Mtatp6			3	0			ATP synthase subunit a
P00920	Ca2	29	0	59	0			Carbonic anhydrase 2
P01027	C3	38	0	3	0			Complement C3
P01029	C4b	2	0					Complement C4-B
P01132	Egf			1	0			Pro-epidermal growth factor
P01592	Igj	1	0					Immunoglobulin J chain
P01831	Thy1			70	0			Thy-1 membrane glycoprotein
P01863	Ighg	4	0					Ig gamma-2A chain C region, A allele
P01865	Igh-1a	4	0					Ig gamma-2A chain C region, membrane-bound form
P01867	Igh-3	14	0					Ig gamma-2B chain C region
P01868	Ighg1	8	0	1	0			Ig gamma-1 chain C region secreted form
P01869	Ighg1	8	0	1	0			Ig gamma-1 chain C region, membrane-bound form
P01872	Ighm	1	0					Ig mu chain C region
P02089	Hbb-b2	126	0	126	0			Hemoglobin subunit beta-2
P02104	Hbb-y	34	0	20	0			Hemoglobin subunit epsilon-Y2
P02301	H3f3c	18	0	30	0			Histone H3.3C
P02463	Col4a1			2	0			Collagen alpha-1(IV) chain
P02468	Lamc1			5	0			Laminin subunit gamma-1
P02469	Lamb1	10	0	8	0			Laminin subunit beta-1
P02762	Mup6	5	0	4	0			Major urinary protein 6
P03888	Mtnd1			6	0			NADH-ubiquinone oxidoreductase chain 1
P03893	Mtnd2	1	1					NADH-ubiquinone oxidoreductase chain 2
P03899	Mtnd3			8	0			NADH-ubiquinone oxidoreductase chain 3
P03911	Mtnd4			2	0			NADH-ubiquinone oxidoreductase chain 4
P03921	Mtnd5	3	2	2	0			NADH-ubiquinone oxidoreductase chain 5
P03930	Mtatp8	6	0	24	0			ATP synthase protein 8
P03958	Ada	1	0	2	0			Adenosine deaminase
P03977	1	1	0					Ig kappa chain V-III region 50S10.1
P03987	1	2	0					Ig gamma-3 chain C region
P03995	Gfap	42	0	150	0			Glial fibrillary acidic protein
P04117	Fabp4	13	0					Fatty acid-binding protein, adipocyte
P04186	Cfb	4	0					Complement factor B
P04426	Wnt1			1	0			Proto-oncogene Wnt-1
P04925	Prnp			2	0			Major prion protein
P04938	Mup8	5	0	4	0			Major urinary proteins 11 and 8 (Fragment)
P04939	Mup3	1	0					Major urinary protein 3
P05063	Aldoc	46	0	216	0			Fructose-bisphosphate aldolase C
P05064	Aldoa	273	0	349	0			Fructose-bisphosphate aldolase A
P05132	Prkaca	4	0	21	0			cAMP-dependent protein kinase catalytic subunit alpha
P05201	Got1	79	0	289	0			Aspartate aminotransferase, cytoplasmic
P05208	Cela2a	4	0					Chymotrypsin-like elastase family member 2A
P05480	Src			6	0			Neuronal proto-oncogene tyrosine-protein kinase Src
P05532	Kit	18	0	7	0			Mast/stem cell growth factor receptor Kit
P05555	Itgam			1	0			Integrin alpha-M
P05977	Myl1	5	0					Myosin light chain 1/3, skeletal muscle isoform
P06151	Ldha	138	0	134	0			L-lactate dehydrogenase A chain
P06330	1	2	0					Ig heavy chain V region AC38 205.12
P06336	4	1	0					Ig epsilon chain C region
P06467	Hbz	1	0					Hemoglobin subunit zeta
P06728	Apoa4	3	0					Apolipoprotein A-IV
P06745	Gpi	55	0	130	0			Glucose-6-phosphate isomerase
P06795	Abcb1b			1	0			Multidrug resistance protein 1B
P06801	Me1	38	0	12	0			NADP-dependent malic enzyme
P06837	Gap43			36	0			Neuromodulin
P06880	Gh1	8	0					Somatotropin
P07146	Prss2	59	0	50	0			Anionic trypsin-2
P07309	Ttr	10	0					Transthyretin
P07310	Ckm	307	0	19	0			Creatine kinase M-type
P07356	Anxa2	194	0	191	0			Annexin A2
P07607	Tyms	5	0					Thymidylate synthase
P07742	Rrm1	6	0					Ribonucleoside-diphosphate reductase large subunit
P07758	Serpina1a	64	0					Alpha-1-antitrypsin 1-1
P07759	Serpina3k	78	0	2	0			Serine protease inhibitor A3K
P07901	Hsp90aa1	418	0	401	0			Heat shock protein HSP 90-alpha
P08003	Pdia4	42	0	20	0			Protein disulfide-isomerase A4
P08030	Aprt	2	0					Adenine phosphoribosyltransferase
P08032	Spta1			17	0			Spectrin alpha chain, erythrocytic 1
P08071	Ltf	9	0	2	0			Lactotransferrin
P08113	Hsp90b1	211	0	183	0			Endoplasmin
P08122	Col4a2			1	0			Collagen alpha-2(IV) chain
P08226	Apoe	9	0	61	0			Apolipoprotein E
P08228	Sod1	36	0	37	0			Superoxide dismutase [Cu-Zn]
P08414	Camk4	1	0					Calcium/calmodulin-dependent protein kinase type IV
P08551	Nefl	6	0	96	0			Neurofilament light polypeptide
P08553	Nefm			38	0			Neurofilament medium polypeptide
P08556	Nras	3	0	17	0			GTPase NRas
P08752	Gnai2	14	0	88	0			Guanine nucleotide-binding protein G(i) subunit alpha-2
P08905	Lyz2	8	0	18	0			Lysozyme C-2
P09041	Pgk2	63	0	77	0			Phosphoglycerate kinase 2
P09055	Itgb1	9	0					Integrin beta-1
P09103	P4hb	95	0	42	0			Protein disulfide-isomerase
P09242	Alpl	2	0					Alkaline phosphatase, tissue-nonspecific isozyme
P09405	Ncl	26	0	95	0			Nucleolin
P09411	Pgk1	153	0	302	0			Phosphoglycerate kinase 1
P09528	Fth1	1	0	10	0			Ferritin heavy chain
P09671	Sod2	7	0	34	0			Superoxide dismutase [Mn], mitochondrial
P09803	Cdh1	4	0					Cadherin-1
P09813	Apoa2	3	0	1	0			Apolipoprotein A-II
P0C0A3	Chmp6	2	0	4	0			Charged multivesicular body protein 6
P0C242	Ccno	1	0					Cyclin-O
P0C7L0	Wipf3			2	0			WAS/WASL-interacting protein family member 3
P0CC03	Sult6b1	1	0					Sulfotransferase 6B1
P0CG49	Ubb	161	0	95	0			Polyubiquitin-B
P0CG50	Ubc	162	0	96	0			Polyubiquitin-C
P0DI97	Nrxn1			1	0			Neurexin-1-beta
P0DM40	Fer1l5	1	0					Fer-1-like protein 5
P10107	Anxa1	14	0	5	0			Annexin A1
P10126	Eef1a1	196	0	166	0			Elongation factor 1-alpha 1
P10287	Cdh3	1	0					Cadherin-3
P10493	Nid1			1	0			Nidogen-1
P10518	Alad	22	0	50	0			Delta-aminolevulinic acid dehydratase
P10605	Ctsb	5	0	10	0			Cathepsin B
P10630	Eif4a2	60	0	80	0			Eukaryotic initiation factor 4A-II
P10637	Mapt			67	0			Microtubule-associated protein tau
P10639	Txn	6	0	12	0			Thioredoxin
P10648	Gsta2	1	0					Glutathione S-transferase A2
P10649	Gstm1	30	0	111	0			Glutathione S-transferase Mu 1
P10749	Il1b	1	0					Interleukin-1 beta
P10761	Zp3	250	0	87	0			Zona pellucida sperm-binding protein 3
P10833	Rras			4	0			Ras-related protein R-Ras
P10852	Slc3a2	15	0	79	0			4F2 cell-surface antigen heavy chain
P10922	H1f0			5	0			Histone H1.0
P11031	Sub1	5	0	20	0			Activated RNA polymerase II transcriptional coactivator p15
P11087	Col1a1	1	0	4	0			Collagen alpha-1(I) chain
P11103	Parp1	10	0					Poly [ADP-ribose] polymerase 1
P11157	Rrm2	2	0					Ribonucleoside-diphosphate reductase subunit M2
P11247	Mpo	1	0					Myeloperoxidase
P11276	Fn1	4	0					Fibronectin
P11352	Gpx1	12	0	12	0			Glutathione peroxidase 1
P11404	Fabp3	15	0	14	0			Fatty acid-binding protein, heart
P11438	Lamp1	4	0	2	0			Lysosome-associated membrane glycoprotein 1
P11440	Cdk1	21	0	2	0			Cyclin-dependent kinase 1
P11499	Hsp90ab1	362	0	403	0			Heat shock protein HSP 90-beta
P11531	Dmd			2	0			Dystrophin
P11588	Mup1	5	0	4	0			Major urinary protein 1
P11589	Mup2	5	0	4	0			Major urinary protein 2
P11591	Mup5			4	0			Major urinary protein 5
P11798	Camk2a			189	0			Calcium/calmodulin-dependent protein kinase type II subunit alpha
P11881	Itpr1	1	0	22	0			Inositol 1,4,5-trisphosphate receptor type 1
P11983	Tcp1	41	0	46	0			T-complex protein 1 subunit alpha
P12023	App			1	0			Amyloid beta A4 protein
P12246	Apcs	1	0					Serum amyloid P-component
P12367	Prkar2a	1	0	30	0			cAMP-dependent protein kinase type II-alpha regulatory subunit
P12382	Pfkl	15	0	50	0			6-phosphofructokinase, liver type
P12658	Calb1	10	0	37	0			Calbindin
P12660	Pcp2			1	0			Purkinje cell protein 2
P12787	Cox5a	3	0	43	0			Cytochrome c oxidase subunit 5A, mitochondrial
P12815	Pdcd6			2	0			Programmed cell death protein 6
P12849	Prkar1b	1	0	2	0			cAMP-dependent protein kinase type I-beta regulatory subunit
P12960	Cntn1			98	0			Contactin-1
P12961	Scg5			5	0			Neuroendocrine protein 7B2
P12970	Rpl7a	22	0	34	0			60S ribosomal protein L7a
P13020	Gsn	18	0	15	0			Gelsolin
P13439	Umps	3	0					Uridine 5'-monophosphate synthase
P13562	Gnrh1	2	0					Progonadoliberin-1
P13595	Ncam1	5	0	298	0			Neural cell adhesion molecule 1
P13634	Ca1	1	0					Carbonic anhydrase 1
P13707	Gpd1	24	0	25	0			Glycerol-3-phosphate dehydrogenase [NAD(+)], cytoplasmic
P13745	Gsta1	1	0					Glutathione S-transferase A1
P13864	Dnmt1	392	0	138	0			DNA (cytosine-5)-methyltransferase 1
P14069	S100a6	155	0					Protein S100-A6
P14094	Atp1b1	3	0	166	0			Sodium/potassium-transporting ATPase subunit beta-1
P14115	Rpl27a	4	0	17	0			60S ribosomal protein L27a
P14131	Rps16	9	0	20	0			40S ribosomal protein S16
P14148	Rpl7	6	0	26	0			60S ribosomal protein L7
P14152	Mdh1	183	0	202	0			Malate dehydrogenase, cytoplasmic
P14206	Rpsa	28	0	35	0			40S ribosomal protein SA
P14211	Calr	91	0	44	0			Calreticulin
P14231	Atp1b2			57	0			Sodium/potassium-transporting ATPase subunit beta-2
P14404	Mecom	1	1					MDS1 and EVI1 complex locus protein EVI1
P14576	Srp54	1	0					Signal recognition particle 54 kDa protein
P14602	Hspb1	16	0					Heat shock protein beta-1
P14685	Psmd3	11	0	30	0			26S proteasome non-ATPase regulatory subunit 3
P14733	Lmnb1	3	0	77	0			Lamin-B1
P14824	Anxa6	53	0	45	0			Annexin A6
P14869	Rplp0	45	0	80	0			60S acidic ribosomal protein P0
P14873	Map1b	9	0	466	0			Microtubule-associated protein 1B
P14901	Hmox1			1	0			Heme oxygenase 1
P15105	Glul	36	0	253	0			Glutamine synthetase
P15116	Cdh2	1	0	12	0			Cadherin-2
P15209	Ntrk2			2	0			BDNF/NT-3 growth factors receptor
P15327	Bpgm	45	0	11	0			Bisphosphoglycerate mutase
P15331	Prph	1	0	12	0			Peripherin
P15388	Kcnc1			2	0			Potassium voltage-gated channel subfamily C member 1
P15508	Sptb			21	0			Spectrin beta chain, erythrocytic
P15532	Nme1	36	0	96	0			Nucleoside diphosphate kinase A
P15626	Gstm2	18	0	26	0			Glutathione S-transferase Mu 2
P15864	Hist1h1c	28	0	90	0			Histone H1.2
P15920	Atp6v0a2			4	0			V-type proton ATPase 116 kDa subunit a isoform 2
P15945	Klk1b5	3	0					Kallikrein 1-related peptidase b5
P15947	Klk1	4	0					Kallikrein-1
P16015	Ca3	71	0					Carbonic anhydrase 3
P16045	Lgals1			2	0			Galectin-1
P16054	Prkce			16	0			Protein kinase C epsilon type
P16110	Lgals3	5	0					Galectin-3
P16125	Ldhb	477	0	285	0			L-lactate dehydrogenase B chain
P16254	Srp14	1	0					Signal recognition particle 14 kDa protein
P16332	Mut			3	0			Methylmalonyl-CoA mutase, mitochondrial
P16381	D1Pas1	23	0	21	0			Putative ATP-dependent RNA helicase Pl10
P16406	Enpep	1	0					Glutamyl aminopeptidase
P16460	Ass1			4	0			Argininosuccinate synthase
P16546	Sptan1	23	0	847	0			Spectrin alpha chain, non-erythrocytic 1
P16627	Hspa1l	116	0	126	0			Heat shock 70 kDa protein 1-like
P17095	Hmga1			5	0			High mobility group protein HMG-I/HMG-Y
P17156	Hspa2	314	0	292	0			Heat shock-related 70 kDa protein 2
P17182	Eno1	247	0	339	0			Alpha-enolase
P17183	Eno2	205	0	344	0			Gamma-enolase
P17225	Ptbp1	3	0					Polypyrimidine tract-binding protein 1
P17426	Ap2a1	14	0	141	0			AP-2 complex subunit alpha-1
P17427	Ap2a2	9	0	131	0			AP-2 complex subunit alpha-2
P17439	Gba			1	0			Glucosylceramidase
P17563	Selenbp1	19	0	3	0			Selenium-binding protein 1
P17665	Cox7c	4	3	2	0			Cytochrome c oxidase subunit 7C, mitochondrial
P17742	Ppia	48	0	176	0			Peptidyl-prolyl cis-trans isomerase A
P17751	Tpi1	132	0	207	0			Triosephosphate isomerase
P17809	Slc2a1			11	0			Solute carrier family 2, facilitated glucose transporter member 1
P17879	Hspa1b	123	0	115	0			Heat shock 70 kDa protein 1B
P17892	Pnliprp2	4	0					Pancreatic lipase-related protein 2
P17897	Lyz1	7	0	18	0			Lysozyme C-1
P17918	Pcna	6	0	4	0			Proliferating cell nuclear antigen
P18052	Ptpra	2	0	2	0			Receptor-type tyrosine-protein phosphatase alpha
P18242	Ctsd	10	0	36	0			Cathepsin D
P18572	Bsg	11	0	36	0			Basigin
P18653	Rps6ka1	6	0	1	0			Ribosomal protein S6 kinase alpha-1
P18654	Rps6ka3	4	0	2	0			Ribosomal protein S6 kinase alpha-3
P18761	Ca6	4	0					Carbonic anhydrase 6
P18826	Phka1	1	0					Phosphorylase b kinase regulatory subunit alpha, skeletal muscle isoform
P18828	Sdc1	2	0					Syndecan-1
P18872	Gnao1	8	0	190	0			Guanine nucleotide-binding protein G(o) subunit alpha
P19096	Fasn	41	0	58	0			Fatty acid synthase
P19157	Gstp1	39	0	81	0			Glutathione S-transferase P 1
P19221	F2	3	0					Prothrombin
P19246	Nefh	1	0	33	0			Neurofilament heavy polypeptide
P19253	Rpl13a	2	0	9	0			60S ribosomal protein L13a
P19324	Serpinh1	9	0	3	0			Serpin H1
P19639	Gstm3	19	0	37	0			Glutathione S-transferase Mu 3
P19783	Cox4i1	5	0	72	0			Cytochrome c oxidase subunit 4 isoform 1, mitochondrial
P20029	Hspa5	335	0	307	0			78 kDa glucose-regulated protein
P20152	Vim	13	0	142	0			Vimentin
P20239	Zp2	577	0	112	0			Zona pellucida sperm-binding protein 2
P20352	F3			1	0			Tissue factor
P20357	Map2			451	0			Microtubule-associated protein 2
P20444	Prkca			31	0			Protein kinase C alpha type
P20612	Gnat1			12	0			Guanine nucleotide-binding protein G(t) subunit alpha-1
P20801	Tnnc2	3	0					Troponin C, skeletal muscle
P20917	Mag			3	0			Myelin-associated glycoprotein
P20918	Plg	6	0					Plasminogen
P21107	Tpm3	4	0	29	0			Tropomyosin alpha-3 chain
P21126	Ubl4a	2	0	2	0			Ubiquitin-like protein 4A
P21271	Myo5b	63	0	30	0			Unconventional myosin-Vb
P21278	Gna11	9	0	51	0			Guanine nucleotide-binding protein subunit alpha-11
P21279	Gnaq	7	0	73	0			Guanine nucleotide-binding protein G(q) subunit alpha
P21300	Akr1b7			2	0			Aldose reductase-related protein 1
P21447	Abcb1a			1	0			Multidrug resistance protein 1A
P21460	Cst3			15	0			Cystatin-C
P21550	Eno3	194	0	107	0			Beta-enolase
P21614	Gc	9	0					Vitamin D-binding protein
P21619	Lmnb2	3	0	33	0			Lamin-B2
P21658	Fgf6			1	0			Fibroblast growth factor 6
P21956	Mfge8	22	0	8	0			Lactadherin
P22315	Fech			2	0			Ferrochelatase, mitochondrial
P22599	Serpina1b	63	0					Alpha-1-antitrypsin 1-2
P22723	Gabrg2			2	0			Gamma-aminobutyric acid receptor subunit gamma-2
P22892	Ap1g1	3	0	14	0			AP-1 complex subunit gamma-1
P22893	Zfp36	1	0					Tristetraprolin
P23116	Eif3a	24	0	3	0			Eukaryotic translation initiation factor 3 subunit A
P23198	Cbx3			37	0			Chromobox protein homolog 3
P23242	Gja1	3	0	27	0			Gap junction alpha-1 protein
P23475	Xrcc6	3	0					X-ray repair cross-complementing protein 6
P23492	Pnp	2	0	2	0			Purine nucleoside phosphorylase
P23506	Pcmt1	2	0	7	0			Protein-L-isoaspartate(D-aspartate) O-methyltransferase
P23591	Tsta3	5	0	10	0			GDP-L-fucose synthase
P23818	Gria1			5	0			Glutamate receptor 1
P23819	Gria2			27	0			Glutamate receptor 2
P23927	Cryab	10	0					Alpha-crystallin B chain
P23953	Ces1c	14	0					Carboxylesterase 1C
P24270	Cat	7	0	13	0			Catalase
P24288	Bcat1			6	0			Branched-chain-amino-acid aminotransferase, cytosolic
P24369	Ppib	14	0	39	0			Peptidyl-prolyl cis-trans isomerase B
P24452	Capg	3	0					Macrophage-capping protein
P24472	Gsta4	23	0	28	0			Glutathione S-transferase A4
P24526	Pmp2	1	0					Myelin P2 protein
P24527	Lta4h	6	0	63	0			Leukotriene A-4 hydrolase
P24529	Th			1	0			Tyrosine 3-monooxygenase
P24547	Impdh2	16	0	6	0			Inosine-5'-monophosphate dehydrogenase 2
P24549	Aldh1a1	16	0	3	0			Retinal dehydrogenase 1
P24610	Pax3			1	0			Paired box protein Pax-3
P24668	M6pr			3	0			Cation-dependent mannose-6-phosphate receptor
P24815	Hsd3b1	3	0	2	0			3 beta-hydroxysteroid dehydrogenase/Delta 5-- 4-isomerase type 1
P25206	Mcm3	11	0					DNA replication licensing factor MCM3
P25444	Rps2	36	0	15	0			40S ribosomal protein S2
P25976	Ubtf			1	0			Nucleolar transcription factor 1
P26039	Tln1	25	0	8	0			Talin-1
P26040	Ezr	33	0	18	0			Ezrin
P26041	Msn	34	0	19	0			Moesin
P26043	Rdx	137	0	41	0			Radixin
P26048	Gabra2			3	0			Gamma-aminobutyric acid receptor subunit alpha-2
P26049	Gabra3			2	0			Gamma-aminobutyric acid receptor subunit alpha-3
P26231	Ctnna1	9	0	7	0			Catenin alpha-1
P26361	Cftr	0	1	1	0			Cystic fibrosis transmembrane conductance regulator
P26369	U2af2	2	0	6	0			Splicing factor U2AF 65 kDa subunit
P26443	Glud1	12	0	320	0			Glutamate dehydrogenase 1, mitochondrial
P26450	Pik3r1	11	0	3	0			Phosphatidylinositol 3-kinase regulatory subunit alpha
P26516	Psmd7	4	0	3	0			26S proteasome non-ATPase regulatory subunit 7
P26618	Pdgfra			1	0			Platelet-derived growth factor receptor alpha
P26638	Sars	11	0	57	0			Serine--tRNA ligase, cytoplasmic
P26645	Marcks	1	0	82	0			Myristoylated alanine-rich C-kinase substrate
P26883	Fkbp1a	2	0	46	0			Peptidyl-prolyl cis-trans isomerase FKBP1A
P27048	Snrpb	3	0	9	0			Small nuclear ribonucleoprotein-associated protein B
P27545	Cers1			1	0			Ceramide synthase 1
P27546	Map4	6	0	42	0			Microtubule-associated protein 4
P27573	Mpz	1	0					Myelin protein P0
P27601	Gna13	1	0	3	0			Guanine nucleotide-binding protein subunit alpha-13
P27612	Plaa	142	0	21	0			Phospholipase A-2-activating protein
P27641	Xrcc5	11	0	2	0			X-ray repair cross-complementing protein 5
P27659	Rpl3	11	0	26	0			60S ribosomal protein L3
P27671	Rasgrf1			1	0			Ras-specific guanine nucleotide-releasing factor 1
P27773	Pdia3	162	0	159	0			Protein disulfide-isomerase A3
P28028	Braf			1	0			Serine/threonine-protein kinase B-raf
P28063	Psmb8	1	0					Proteasome subunit beta type-8
P28271	Aco1	17	0	3	0			Cytoplasmic aconitate hydratase
P28352	Apex1	1	0	30	0			DNA-(apurinic or apyrimidinic site) lyase
P28474	Adh5	12	0	53	0			Alcohol dehydrogenase class-3
P28571	Slc6a9			2	0			Sodium- and chloride-dependent glycine transporter 1
P28650	Adssl1	21	0	1	0			Adenylosuccinate synthetase isozyme 1
P28651	Ca8			2	0			Carbonic anhydrase-related protein
P28652	Camk2b	1	0	244	0			Calcium/calmodulin-dependent protein kinase type II subunit beta
P28656	Nap1l1	10	0	24	0			Nucleosome assembly protein 1-like 1
P28658	Atxn10			4	0			Ataxin-10
P28659	Celf1			5	0			CUGBP Elav-like family member 1
P28660	Nckap1	4	0	21	0			Nck-associated protein 1
P28661	45173			3	0			Septin-4
P28663	Napb	4	0	129	0			Beta-soluble NSF attachment protein
P28665	Mug1	7	0					Murinoglobulin-1
P28666	Mug2	3	0					Murinoglobulin-2
P28667	Marcksl1			12	0			MARCKS-related protein
P28738	Kif5c			7	0			Kinesin heavy chain isoform 5C
P28740	Kif2a	10	0	21	0			Kinesin-like protein KIF2A
P28867	Prkcd	10	0					Protein kinase C delta type
P29319	Epha3			2	0			Ephrin type-A receptor 3
P29341	Pabpc1	55	0	74	0			Polyadenylate-binding protein 1
P29387	Gnb4	6	0	65	0			Guanine nucleotide-binding protein subunit beta-4
P29391	Ftl1	25	0	12	0			Ferritin light chain 1
P29595	Nedd8			1	0			NEDD8
P29621	Serpina3c	1	0					Serine protease inhibitor A3C
P29699	Ahsg	38	0					Alpha-2-HS-glycoprotein
P29754	Agtr1a	1	1					Type-1A angiotensin II receptor
P29758	Oat	18	0	22	0			Ornithine aminotransferase, mitochondrial
P30275	Ckmt1	6	0	114	0			Creatine kinase U-type, mitochondrial
P30306	Cdc25b	1	0					M-phase inducer phosphatase 2
P30412	Ppic	2	0					Peptidyl-prolyl cis-trans isomerase C
P30416	Fkbp4	12	0	15	0			Peptidyl-prolyl cis-trans isomerase FKBP4
P30677	Gna14	3	0	21	0			Guanine nucleotide-binding protein subunit alpha-14
P30681	Hmgb2	5	0	7	0			High mobility group protein B2
P30999	Ctnnd1	3	0	3	0			Catenin delta-1
P31001	Des			35	0			Desmin
P31230	Aimp1	11	0	13	0			Aminoacyl tRNA synthase complex-interacting multifunctional protein 1
P31254	Uba1y	9	0	48	0			Ubiquitin-like modifier-activating enzyme 1 Y
P31324	Prkar2b			36	0			cAMP-dependent protein kinase type II-beta regulatory subunit
P31648	Slc6a1			43	0			Sodium- and chloride-dependent GABA transporter 1
P31650	Slc6a11			30	0			Sodium- and chloride-dependent GABA transporter 3
P31750	Akt1			2	0			RAC-alpha serine/threonine-protein kinase
P31786	Dbi	2	0	16	0			Acyl-CoA-binding protein
P31938	Map2k1	6	0	51	0			Dual specificity mitogen-activated protein kinase kinase 1
P32020	Scp2	2	0	5	0			Non-specific lipid-transfer protein
P32037	Slc2a3			13	0			Solute carrier family 2, facilitated glucose transporter member 3
P32067	Ssb	10	0	3	0			Lupus La protein homolog
P32114	Pax2	1	0					Paired box protein Pax-2
P32233	Drg1	6	0	1	0			Developmentally-regulated GTP-binding protein 1
P32261	Serpinc1	9	0					Antithrombin-III
P32848	Pvalb	69	0	2	0			Parvalbumin alpha
P32883	Kras	1	0	14	0			GTPase KRas
P32921	Wars	7	0	29	0			Tryptophan--tRNA ligase, cytoplasmic
P33173	Kif1a			3	0			Kinesin-like protein KIF1A
P33174	Kif4	2	1					Chromosome-associated kinesin KIF4
P33175	Kif5a			6	0			Kinesin heavy chain isoform 5A
P33622	Apoc3	1	0					Apolipoprotein C-III
P34022	Ranbp1	5	0	13	0			Ran-specific GTPase-activating protein
P34884	Mif	22	0	17	0			Macrophage migration inhibitory factor
P34914	Ephx2	3	0	9	0			Bifunctional epoxide hydrolase 2
P35123	Usp4	8	0					Ubiquitin carboxyl-terminal hydrolase 4
P35235	Ptpn11	6	0	21	0			Tyrosine-protein phosphatase non-receptor type 11
P35276	Rab3d	20	0	20	0			Ras-related protein Rab-3D
P35278	Rab5c	17	0	33	0			Ras-related protein Rab-5C
P35279	Rab6a	7	0	32	0			Ras-related protein Rab-6A
P35282	Rab21	23	0	13	0			Ras-related protein Rab-21
P35283	Rab12	2	0	1	0			Ras-related protein Rab-12
P35285	Rab22a	5	0	4	0			Ras-related protein Rab-22A
P35292	Rab17	1	0					Ras-related protein Rab-17
P35293	Rab18	3	0	17	0			Ras-related protein Rab-18
P35374	Agtr2			1	0			Type-2 angiotensin II receptor
P35375	Ptger1	1	1					Prostaglandin E2 receptor EP1 subtype
P35438	Grin1			2	0			Glutamate receptor ionotropic, NMDA 1
P35492	Hal	11	0	19	0			Histidine ammonia-lyase
P35505	Fah	2	0					Fumarylacetoacetase
P35550	Fbl			1	0			rRNA 2'-O-methyltransferase fibrillarin
P35564	Canx	33	0	91	0			Calnexin
P35585	Ap1m1	8	0	7	0			AP-1 complex subunit mu-1
P35700	Prdx1	59	0	96	0			Peroxiredoxin-1
P35761	Ttk	5	0	2	0			Dual specificity protein kinase TTK
P35762	Cd81	3	0	11	0			CD81 antigen
P35802	Gpm6a			41	0			Neuronal membrane glycoprotein M6-a
P35803	Gpm6b			16	0			Neuronal membrane glycoprotein M6-b
P35821	Ptpn1			1	0			Tyrosine-protein phosphatase non-receptor type 1
P35922	Fmr1	1	0					Fragile X mental retardation protein 1 homolog
P35979	Rpl12	24	0	44	0			60S ribosomal protein L12
P35980	Rpl18	13	0	39	0			60S ribosomal protein L18
P35991	Btk	1	0					Tyrosine-protein kinase BTK
P36536	Sar1a	1	0	12	0			GTP-binding protein SAR1a
P36916	Gnl1	4	0	1	0			Guanine nucleotide-binding protein-like 1
P36993	Ppm1b	5	0	1	0			Protein phosphatase 1B
P37040	Por	9	0	6	0			NADPH--cytochrome P450 reductase
P37804	Tagln	8	0	1	0			Transgelin
P37913	Lig1	2	0					DNA ligase 1
P38060	Hmgcl	2	0	6	0			Hydroxymethylglutaryl-CoA lyase, mitochondrial
P39038	Cdh4			7	0			Cadherin-4
P39053	Dnm1	4	0	269	0			Dynamin-1
P39054	Dnm2	5	0	53	0			Dynamin-2
P39447	Tjp1	11	0	4	0			Tight junction protein ZO-1
P39688	Fyn			3	0			Tyrosine-protein kinase Fyn
P39749	Fen1	1	0					Flap endonuclease 1
P40124	Cap1	29	0	62	0			Adenylyl cyclase-associated protein 1
P40142	Tkt	82	0	83	0			Transketolase
P40237	Cd82			5	0			CD82 antigen
P40240	Cd9	3	0					CD9 antigen
P40336	Vps26a	21	0	7	0			Vacuolar protein sorting-associated protein 26A
P40630	Tfam	2	0	5	0			Transcription factor A, mitochondrial
P40936	Inmt	11	0					Indolethylamine N-methyltransferase
P41105	Rpl28			1	0			60S ribosomal protein L28
P41241	Csk			1	0			Tyrosine-protein kinase CSK
P42125	Eci1	10	0	9	0			Enoyl-CoA delta isomerase 1, mitochondrial
P42208	45171	26	0	28	0			Septin-2
P42227	Stat3	22	0	5	0			Signal transducer and activator of transcription 3
P42567	Eps15	11	0	1	0			Epidermal growth factor receptor substrate 15
P42669	Pura	1	0	52	0			Transcriptional activator protein Pur-alpha
P42859	Htt			1	0			Huntingtin
P42925	Pxmp2	1	0					Peroxisomal membrane protein 2
P42932	Cct8	44	0	108	0			T-complex protein 1 subunit theta
P43006	Slc1a2			124	0			Excitatory amino acid transporter 2
P43024	Cox6a1	2	2	12	0			Cytochrome c oxidase subunit 6A1, mitochondrial
P43247	Msh2	1	0					DNA mismatch repair protein Msh2
P43274	Hist1h1e	25	0	61	0			Histone H1.4
P43275	Hist1h1a			23	0			Histone H1.1
P43276	Hist1h1b	3	0	22	0			Histone H1.5
P43406	Itgav	5	0	1	0			Integrin alpha-V
P45376	Akr1b1	58	0	88	0			Aldose reductase
P45377	Akr1b8	6	0					Aldose reductase-related protein 2
P45878	Fkbp2	9	0	3	0			Peptidyl-prolyl cis-trans isomerase FKBP2
P46061	Rangap1	8	0	2	0			Ran GTPase-activating protein 1
P46096	Syt1			154	0			Synaptotagmin-1
P46097	Syt2			57	0			Synaptotagmin-2
P46412	Gpx3	2	0					Glutathione peroxidase 3
P46425	Gstp2	35	0	42	0			Glutathione S-transferase P 2
P46460	Nsf	81	0	270	0			Vesicle-fusing ATPase
P46467	Vps4b	2	0	5	0			Vacuolar protein sorting-associated protein 4B
P46471	Psmc2	11	0	16	0			26S protease regulatory subunit 7
P46638	Rab11b	36	0	80	0			Ras-related protein Rab-11B
P46660	Ina			104	0			Alpha-internexin
P46664	Adss	53	0	16	0			Adenylosuccinate synthetase isozyme 2
P46737	Brcc3			1	0			Lys-63-specific deubiquitinase BRCC36
P46935	Nedd4	1	0	6	0			E3 ubiquitin-protein ligase NEDD4
P46978	Stt3a			3	0			Dolichyl-diphosphooligosaccharide--protein glycosyltransferase subunit STT3A
P47199	Cryz	4	0	1	0			Quinone oxidoreductase
P47708	Rph3a	1	0	25	0			Rabphilin-3A
P47738	Aldh2	80	0	86	0			Aldehyde dehydrogenase, mitochondrial
P47739	Aldh3a1	1	0	1	0			Aldehyde dehydrogenase, dimeric NADP-preferring
P47740	Aldh3a2	1	0	5	0			Fatty aldehyde dehydrogenase
P47753	Capza1	12	0	18	0			F-actin-capping protein subunit alpha-1
P47754	Capza2	9	0	61	0			F-actin-capping protein subunit alpha-2
P47757	Capzb	16	0	63	0			F-actin-capping protein subunit beta
P47758	Srprb	9	0	1	0			Signal recognition particle receptor subunit beta
P47791	Gsr	13	0	11	0			Glutathione reductase, mitochondrial
P47802	Mtx1			7	0			Metaxin-1
P47809	Map2k4	13	0	5	0			Dual specificity mitogen-activated protein kinase kinase 4
P47856	Gfpt1	27	0	1	0			Glutamine--fructose-6-phosphate aminotransferase [isomerizing] 1
P47857	Pfkm	35	0	119	0			6-phosphofructokinase, muscle type
P47867	Scg3			1	0			Secretogranin-3
P47911	Rpl6	10	0	32	0			60S ribosomal protein L6
P47915	Rpl29			6	0			60S ribosomal protein L29
P47934	Crat			1	0			Carnitine O-acetyltransferase
P47941	Crkl	1	0	1	0			Crk-like protein
P47955	Rplp1			5	0			60S acidic ribosomal protein P1
P47962	Rpl5	15	0	25	0			60S ribosomal protein L5
P47963	Rpl13	3	0	24	0			60S ribosomal protein L13
P47964	Rpl36	1	0					60S ribosomal protein L36
P47968	Rpia	1	0					Ribose-5-phosphate isomerase
P48024	Eif1	1	0	9	0			Eukaryotic translation initiation factor 1
P48036	Anxa5	24	0	77	0			Annexin A5
P48193	Epb41			5	0			Protein 4.1
P48318	Gad1			35	0			Glutamate decarboxylase 1
P48320	Gad2			25	0			Glutamate decarboxylase 2
P48428	Tbca	11	0	1	0			Tubulin-specific chaperone A
P48453	Ppp3cb			80	0			Serine/threonine-protein phosphatase 2B catalytic subunit beta isoform
P48455	Ppp3cc			34	0			Serine/threonine-protein phosphatase 2B catalytic subunit gamma isoform
P48678	Lmna	30	0	38	0			Prelamin-A/C
P48722	Hspa4l	19	0	125	0			Heat shock 70 kDa protein 4L
P48758	Cbr1	22	0	70	0			Carbonyl reductase [NADPH] 1
P48771	Cox7a2	1	0	21	0			Cytochrome c oxidase subunit 7A2, mitochondrial
P48774	Gstm5	55	0	59	0			Glutathione S-transferase Mu 5
P49025	Cit	4	0					Citron Rho-interacting kinase
P49312	Hnrnpa1	11	0	66	0			Heterogeneous nuclear ribonucleoprotein A1
P49442	Inpp1			14	0			Inositol polyphosphate 1-phosphatase
P49443	Ppm1a	3	0	4	0			Protein phosphatase 1A
P49586	Pcyt1a	1	0					Choline-phosphate cytidylyltransferase A
P49615	Cdk5	17	0	13	0			Cyclin-dependent kinase 5
P49717	Mcm4	1	0					DNA replication licensing factor MCM4
P49718	Mcm5	7	0	2	0			DNA replication licensing factor MCM5
P49722	Psma2	16	0	13	0			Proteasome subunit alpha type-2
P49769	Psen1	3	0	1	0			Presenilin-1
P49813	Tmod1			3	0			Tropomodulin-1
P49935	Ctsh	1	0					Pro-cathepsin H
P49945	Ftl2	9	0	3	0			Ferritin light chain 2
P49962	Srp9			2	0			Signal recognition particle 9 kDa protein
P50114	S100b	7	0					Protein S100-B
P50149	Gnat2			12	0			Guanine nucleotide-binding protein G(t) subunit alpha-2
P50153	Gng4			16	0			Guanine nucleotide-binding protein G(I)/G(S)/G(O) subunit gamma-4
P50171	Hsd17b8	9	0	12	0			Estradiol 17-beta-dehydrogenase 8
P50247	Ahcy	23	0	34	0			Adenosylhomocysteinase
P50396	Gdi1	48	0	358	0			Rab GDP dissociation inhibitor alpha
P50429	Arsb			5	0			Arylsulfatase B
P50462	Csrp3	1	0					Cysteine and glycine-rich protein 3
P50516	Atp6v1a	47	0	259	0			V-type proton ATPase catalytic subunit A
P50518	Atp6v1e1	14	0	58	0			V-type proton ATPase subunit E 1
P50543	S100a11	15	0					Protein S100-A11
P50571	Gabrb1			7	0			Gamma-aminobutyric acid receptor subunit beta-1
P50580	Pa2g4	5	0	8	0			Proliferation-associated protein 2G4
P50636	Rnf19a			0	1			E3 ubiquitin-protein ligase RNF19A
P51150	Rab7a	30	0	111	0			Ras-related protein Rab-7a
P51175	Ppox			1	0			Protoporphyrinogen oxidase
P51410	Rpl9	11	0	9	0			60S ribosomal protein L9
P51655	Gpc4	1	0					Glypican-4
P51660	Hsd17b4	56	0	26	0			Peroxisomal multifunctional enzyme type 2
P51791	Clcn3			2	0			H(+)/Cl(-) exchange transporter 3
P51807	Dynlt1	1	0					Dynein light chain Tctex-type 1
P51830	Adcy9			1	0			Adenylate cyclase type 9
P51855	Gss	1	0	5	0			Glutathione synthetase
P51859	Hdgf			16	0			Hepatoma-derived growth factor
P51863	Atp6v0d1	8	0	73	0			V-type proton ATPase subunit d 1
P51880	Fabp7			59	0			Fatty acid-binding protein, brain
P51885	Lum	8	0					Lumican
P51906	Slc1a1			3	0			Excitatory amino acid transporter 3
P51910	Apod	1	0					Apolipoprotein D
P52189	Kcnj4			2	0			Inward rectifier potassium channel 4
P52196	Tst			29	0			Thiosulfate sulfurtransferase
P52293	Kpna2	22	0	13	0			Importin subunit alpha-1
P52332	Jak1	1	0					Tyrosine-protein kinase JAK1
P52431	Pold1	3	0					DNA polymerase delta catalytic subunit
P52480	Pkm	436	0	396	0			Pyruvate kinase PKM
P52503	Ndufs6			6	0			NADH dehydrogenase [ubiquinone] iron-sulfur protein 6, mitochondrial
P52624	Upp1	12	0	3	0			Uridine phosphorylase 1
P52760	Hrsp12	5	0	16	0			Ribonuclease UK114
P52785	Gucy2e	1	0					Guanylyl cyclase GC-E
P52801	Efna2	1	0					Ephrin-A2
P52875	Tmem165			1	0			Transmembrane protein 165
P52912	Tia1			1	0			Nucleolysin TIA-1
P53026	Rpl10a	10	0	12	0			60S ribosomal protein L10a
P53395	Dbt			1	0			Lipoamide acyltransferase component of branched-chain alpha-keto acid dehydrogenase complex, mitochondrial
P53612	Rabggtb	3	0	1	0			Geranylgeranyl transferase type-2 subunit beta
P53657	Pklr	11	0	17	0			Pyruvate kinase PKLR
P53702	Hccs	6	0	11	0			Cytochrome c-type heme lyase
P53784	Sox3	1	0					Transcription factor SOX-3
P53798	Fdft1	9	0	1	0			Squalene synthase
P53810	Pitpna	12	0	45	0			Phosphatidylinositol transfer protein alpha isoform
P53811	Pitpnb			2	0			Phosphatidylinositol transfer protein beta isoform
P53986	Slc16a1	7	0	9	0			Monocarboxylate transporter 1
P53994	Rab2a	19	0	89	0			Ras-related protein Rab-2A
P53996	Cnbp	1	0	3	0			Cellular nucleic acid-binding protein
P54116	Stom	6	0	2	1			Erythrocyte band 7 integral membrane protein
P54227	Stmn1			25	0			Stathmin
P54276	Msh6	1	0					DNA mismatch repair protein Msh6
P54285	Cacnb3			4	0			Voltage-dependent L-type calcium channel subunit beta-3
P54728	Rad23b	2	0	1	0			UV excision repair protein RAD23 homolog B
P54729	Nub1	5	0					NEDD8 ultimate buster 1
P54731	Faf1	8	0					FAS-associated factor 1
P54763	Ephb2			1	0			Ephrin type-B receptor 2
P54775	Psmc4	1	0	11	0			26S protease regulatory subunit 6B
P54822	Adsl	7	0	6	0			Adenylosuccinate lyase
P54823	Ddx6	48	0	29	0			Probable ATP-dependent RNA helicase DDX6
P54869	Hmgcs2	2	0	6	0			Hydroxymethylglutaryl-CoA synthase, mitochondrial
P55012	Slc12a2			2	0			Solute carrier family 12 member 2
P55066	Ncan			34	0			Neurocan core protein
P55088	Aqp4			25	0			Aquaporin-4
P55096	Abcd3	12	0	7	0			ATP-binding cassette sub-family D member 3
P55258	Rab8a	3	0	16	0			Ras-related protein Rab-8A
P55264	Adk	24	0	36	0			Adenosine kinase
P55302	Lrpap1	9	0	4	0			Alpha-2-macroglobulin receptor-associated protein
P55821	Stmn2			11	0			Stathmin-2
P55849	Dsc1			16	0			Desmocollin-1
P55937	Golga3	2	0					Golgin subfamily A member 3
P56135	Atp5j2			11	0			ATP synthase subunit f, mitochondrial
P56203	Ctsw	1	0					Cathepsin W
P56212	Arpp19			1	0			cAMP-regulated phosphoprotein 19
P56213	Gfer			1	0			FAD-linked sulfhydryl oxidase ALR
P56371	Rab4a	5	0	8	0			Ras-related protein Rab-4A
P56375	Acyp2	2	0	5	0			Acylphosphatase-2
P56376	Acyp1			2	0			Acylphosphatase-1
P56379	Mp68			3	0			6.8 kDa mitochondrial proteolipid
P56380	Nudt2	3	0	5	0			Bis(5'-nucleosyl)-tetraphosphatase [asymmetrical]
P56382	Atp5e			6	0			ATP synthase subunit epsilon, mitochondrial
P56387	Dynlt3			1	0			Dynein light chain Tctex-type 3
P56391	Cox6b1			38	0			Cytochrome c oxidase subunit 6B1
P56394	Cox17			1	0			Cytochrome c oxidase copper chaperone
P56395	Cyb5a	11	0	4	0			Cytochrome b5
P56399	Usp5	27	0	90	0			Ubiquitin carboxyl-terminal hydrolase 5
P56546	Ctbp2			3	0			C-terminal-binding protein 2
P56564	Slc1a3			80	0			Excitatory amino acid transporter 1
P56565	S100a1	10	0					Protein S100-A1
P56695	Wfs1			1	0			Wolframin
P56812	Pdcd5	10	0	2	0			Programmed cell death protein 5
P56873	Sssca1	1	0	1	0			Sjoegren syndrome/scleroderma autoantigen 1 homolog
P56942	Pmch	1	0					Pro-MCH
P56959	Fus	2	0	34	0			RNA-binding protein FUS
P57716	Ncstn	15	0	1	0			Nicastrin
P57722	Pcbp3	12	0	61	0			Poly(rC)-binding protein 3
P57746	Atp6v1d	10	0	37	0			V-type proton ATPase subunit D
P57759	Erp29	9	0	16	0			Endoplasmic reticulum resident protein 29
P57776	Eef1d	31	0	23	0			Elongation factor 1-delta
P57780	Actn4	101	0	228	0			Alpha-actinin-4
P57784	Snrpa1	4	0	4	0			U2 small nuclear ribonucleoprotein A'
P58021	Tm9sf2	8	0	2	0			Transmembrane 9 superfamily member 2
P58044	Idi1	1	0	2	0			Isopentenyl-diphosphate Delta-isomerase 1
P58137	Acot8	6	0	3	0			Acyl-coenzyme A thioesterase 8
P58242	Smpdl3b	2	0					Acid sphingomyelinase-like phosphodiesterase 3b
P58252	Eef2	259	0	139	0			Elongation factor 2
P58281	Opa1	16	0	52	0			Dynamin-like 120 kDa protein, mitochondrial
P58321	Uchl4	6	0	8	0			Ubiquitin carboxyl-terminal hydrolase isozyme L4
P58389	Ppp2r4	3	0	19	0			Serine/threonine-protein phosphatase 2A activator
P58404	Strn4			1	0			Striatin-4
P58659	Eva1c			1	0			Protein eva-1 homolog C
P58742	Aaas	3	0					Aladin
P58771	Tpm1	11	0	21	0			Tropomyosin alpha-1 chain
P58774	Tpm2	8	0	11	0			Tropomyosin beta chain
P58802	Tbc1d10a	1	0					TBC1 domain family member 10A
P58871	Tnks1bp1	2	0					182 kDa tankyrase-1-binding protein
P59016	Vps33b	6	0					Vacuolar protein sorting-associated protein 33B
P59017	Bcl2l13			2	0			Bcl-2-like protein 13
P59108	Cpne2	4	0	16	0			Copine-2
P59242	Cgn	8	0	1	0			Cingulin
P59279	Rab2b	7	0	43	0			Ras-related protein Rab-2B
P59280	Klhl8	4	0	1	0			Kelch-like protein 8
P59325	Eif5	12	0	2	0			Eukaryotic translation initiation factor 5
P59326	Ythdf1	1	0	1	0			YTH domain-containing family protein 1
P59481	Lman2l			1	0			VIP36-like protein
P59644	Inpp5j			9	0			Phosphatidylinositol 4,5-bisphosphate 5-phosphatase A
P59648	Fxyd7			8	0			FXYD domain-containing ion transport regulator 7
P59708	Sf3b14			2	0			Pre-mRNA branch site protein p14
P59823	Il1rapl1			1	0			Interleukin-1 receptor accessory protein-like 1
P59999	Arpc4	16	0	37	0			Actin-related protein 2/3 complex subunit 4
P60122	Ruvbl1	14	0	4	0			RuvB-like 1
P60202	Plp1	5	0	71	0			Myelin proteolipid protein
P60229	Eif3e	4	0	2	0			Eukaryotic translation initiation factor 3 subunit E
P60330	Espl1			1	0			Separin
P60334	Cdo1	4	0					Cysteine dioxygenase type 1
P60335	Pcbp1	20	0	55	0			Poly(rC)-binding protein 1
P60469	Ppfia3			5	0			Liprin-alpha-3
P60487	Pdxp	10	0	46	0			Pyridoxal phosphate phosphatase
P60521	Gabarapl2			13	0			Gamma-aminobutyric acid receptor-associated protein-like 2
P60603	Romo1	5	5	1	0			Reactive oxygen species modulator 1
P60670	Nploc4	16	0	4	0			Nuclear protein localization protein 4 homolog
P60755	Mdga2			1	0			MAM domain-containing glycosylphosphatidylinositol anchor protein 2
P60764	Rac3	6	0	34	0			Ras-related C3 botulinum toxin substrate 3
P60766	Cdc42	14	0	38	0			Cell division control protein 42 homolog
P60824	Cirbp	4	0	4	0			Cold-inducible RNA-binding protein
P60840	Ensa			1	0			Alpha-endosulfine
P60843	Eif4a1	73	0	74	0			Eukaryotic initiation factor 4A-I
P60867	Rps20	10	0	12	0			40S ribosomal protein S20
P60879	Snap25			140	0			Synaptosomal-associated protein 25
P60904	Dnajc5			14	0			DnaJ homolog subfamily C member 5
P61021	Rab5b	15	0	32	0			Ras-related protein Rab-5B
P61022	Chp1			8	0			Calcineurin B homologous protein 1
P61027	Rab10	1	0	21	0			Ras-related protein Rab-10
P61028	Rab8b			17	0			Ras-related protein Rab-8B
P61079	Ube2d3	36	0	6	0			Ubiquitin-conjugating enzyme E2 D3
P61080	Ube2d1	14	0					Ubiquitin-conjugating enzyme E2 D1
P61082	Ube2m	6	0	17	0			NEDD8-conjugating enzyme Ubc12
P61087	Ube2k	31	0	18	0			Ubiquitin-conjugating enzyme E2 K
P61089	Ube2n	10	0	33	0			Ubiquitin-conjugating enzyme E2 N
P61148	Fgf1			2	0			Fibroblast growth factor 1
P61161	Actr2	11	0	58	0			Actin-related protein 2
P61164	Actr1a	16	0	33	0			Alpha-centractin
P61202	Cops2	15	0	4	0			COP9 signalosome complex subunit 2
P61205	Arf3	56	0	117	0			ADP-ribosylation factor 3
P61211	Arl1	6	0	11	0			ADP-ribosylation factor-like protein 1
P61222	Abce1	5	0	4	0			ATP-binding cassette sub-family E member 1
P61226	Rap2b	8	0	22	0			Ras-related protein Rap-2b
P61255	Rpl26	3	0	13	0			60S ribosomal protein L26
P61290	Psme3	8	0	3	0			Proteasome activator complex subunit 3
P61294	Rab6b	4	0	35	0			Ras-related protein Rab-6B
P61315	Gal3st3	1	0					Galactose-3-O-sulfotransferase 3
P61327	Magoh	2	0					Protein mago nashi homolog
P61329	Fgf12			1	0			Fibroblast growth factor 12
P61358	Rpl27	8	0	18	0			60S ribosomal protein L27
P61460	Depdc5			1	0			DEP domain-containing protein 5
P61514	Rpl37a			8	0			60S ribosomal protein L37a
P61750	Arf4	48	0	48	0			ADP-ribosylation factor 4
P61759	Vbp1	7	0	4	0			Prefoldin subunit 3
P61804	Dad1	2	0	6	0			Dolichyl-diphosphooligosaccharide--protein glycosyltransferase subunit DAD1
P61922	Abat	3	0	177	0			4-aminobutyrate aminotransferase, mitochondrial
P61924	Copz1	12	0	10	0			Coatomer subunit zeta-1
P61957	Sumo2	1	0	7	0			Small ubiquitin-related modifier 2
P61961	Ufm1			1	0			Ubiquitin-fold modifier 1
P61965	Wdr5	10	0					WD repeat-containing protein 5
P61967	Ap1s1	3	0	7	0			AP-1 complex subunit sigma-1A
P61971	Nutf2	2	0	4	0			Nuclear transport factor 2
P61979	Hnrnpk	49	0	158	0			Heterogeneous nuclear ribonucleoprotein K
P62069	Usp46			2	0			Ubiquitin carboxyl-terminal hydrolase 46
P62071	Rras2			4	0			Ras-related protein R-Ras2
P62073	Timm10			2	0			Mitochondrial import inner membrane translocase subunit Tim10
P62075	Timm13	1	0	4	0			Mitochondrial import inner membrane translocase subunit Tim13
P62082	Rps7	16	0	5	0			40S ribosomal protein S7
P62137	Ppp1ca	36	0	67	0			Serine/threonine-protein phosphatase PP1-alpha catalytic subunit
P62141	Ppp1cb	32	0	63	0			Serine/threonine-protein phosphatase PP1-beta catalytic subunit
P62192	Psmc1	13	0	7	0			26S protease regulatory subunit 4
P62196	Psmc5	6	0	2	0			26S protease regulatory subunit 8
P62204	Calm1	60	0	111	0			Calmodulin
P62242	Rps8	12	0	54	0			40S ribosomal protein S8
P62245	Rps15a	2	0	6	0			40S ribosomal protein S15a
P62254	Ube2g1	10	0	3	0			Ubiquitin-conjugating enzyme E2 G1
P62259	Ywhae	104	0	219	0			14-3-3 protein epsilon
P62264	Rps14	11	0	25	0			40S ribosomal protein S14
P62267	Rps23	15	0	9	0			40S ribosomal protein S23
P62270	Rps18	13	0	31	0			40S ribosomal protein S18
P62274	Rps29			10	0			40S ribosomal protein S29
P62281	Rps11	8	0	8	0			40S ribosomal protein S11
P62301	Rps13	5	0	7	0			40S ribosomal protein S13
P62305	Snrpe	4	0	9	0			Small nuclear ribonucleoprotein E
P62307	Snrpf			2	0			Small nuclear ribonucleoprotein F
P62309	Snrpg			1	0			Small nuclear ribonucleoprotein G
P62311	Lsm3			1	0			U6 snRNA-associated Sm-like protein LSm3
P62313	Lsm6	2	0	1	0			U6 snRNA-associated Sm-like protein LSm6
P62315	Snrpd1	9	0	4	0			Small nuclear ribonucleoprotein Sm D1
P62317	Snrpd2	1	0	10	0			Small nuclear ribonucleoprotein Sm D2
P62320	Snrpd3	2	0	22	0			Small nuclear ribonucleoprotein Sm D3
P62331	Arf6	4	0	20	0			ADP-ribosylation factor 6
P62334	Psmc6	18	0	10	0			26S protease regulatory subunit 10B
P62484	Abi2			8	0			Abl interactor 2
P62488	Polr2g	8	0					DNA-directed RNA polymerase II subunit RPB7
P62492	Rab11a	43	0	79	0			Ras-related protein Rab-11A
P62500	Tsc22d1	1	0	2	0			TSC22 domain family protein 1
P62627	Dynlrb1	1	0	8	0			Dynein light chain roadblock-type 1
P62631	Eef1a2	131	0	110	0			Elongation factor 1-alpha 2
P62700	Ypel5	3	0					Protein yippee-like 5
P62702	Rps4x	11	0	41	0			40S ribosomal protein S4, X isoform
P62715	Ppp2cb	3	0	46	0			Serine/threonine-protein phosphatase 2A catalytic subunit beta isoform
P62717	Rpl18a	11	0	31	0			60S ribosomal protein L18a
P62743	Ap2s1	2	0	38	0			AP-2 complex subunit sigma
P62746	Rhob	11	0	43	0			Rho-related GTP-binding protein RhoB
P62748	Hpcal1	10	0	34	0			Hippocalcin-like protein 1
P62751	Rpl23a	1	0	8	0			60S ribosomal protein L23a
P62754	Rps6	11	0	19	0			40S ribosomal protein S6
P62761	Vsnl1	2	0	41	0			Visinin-like protein 1
P62774	Mtpn	1	0	21	0			Myotrophin
P62812	Gabra1			10	0			Gamma-aminobutyric acid receptor subunit alpha-1
P62814	Atp6v1b2	25	0	133	0			V-type proton ATPase subunit B, brain isoform
P62821	Rab1A	29	0	20	0			Ras-related protein Rab-1A
P62823	Rab3c	1	0	48	0			Ras-related protein Rab-3C
P62827	Ran	42	0	52	0			GTP-binding nuclear protein Ran
P62830	Rpl23	8	0	5	0			60S ribosomal protein L23
P62835	Rap1a	10	0	19	0			Ras-related protein Rap-1A
P62838	Ube2d2	35	0	6	0			Ubiquitin-conjugating enzyme E2 D2
P62843	Rps15	3	0					40S ribosomal protein S15
P62849	Rps24	5	0	7	0			40S ribosomal protein S24
P62852	Rps25	9	0	14	0			40S ribosomal protein S25
P62855	Rps26	4	0	8	0			40S ribosomal protein S26
P62858	Rps28	7	0	10	0			40S ribosomal protein S28
P62869	Tceb2	15	0	30	0			Transcription elongation factor B polypeptide 2
P62874	Gnb1	10	0	199	0			Guanine nucleotide-binding protein G(I)/G(S)/G(T) subunit beta-1
P62880	Gnb2	5	0	120	0			Guanine nucleotide-binding protein G(I)/G(S)/G(T) subunit beta-2
P62881	Gnb5			5	0			Guanine nucleotide-binding protein subunit beta-5
P62889	Rpl30	9	0	17	0			60S ribosomal protein L30
P62897	Cycs	15	0	69	0			Cytochrome c, somatic
P62900	Rpl31	12	0	7	0			60S ribosomal protein L31
P62908	Rps3	26	0	63	0			40S ribosomal protein S3
P62911	Rpl32	2	0	10	0			60S ribosomal protein L32
P62915	Gtf2b	4	0	2	0			Transcription initiation factor IIB
P62918	Rpl8	9	0	14	0			60S ribosomal protein L8
P62960	Ybx1	53	0	37	0			Nuclease-sensitive element-binding protein 1
P62962	Pfn1	43	0	89	0			Profilin-1
P62965	Crabp1			2	0			Cellular retinoic acid-binding protein 1
P62983	Rps27a	155	0	94	0			Ubiquitin-40S ribosomal protein S27a
P62984	Uba52	155	0	92	0			Ubiquitin-60S ribosomal protein L40
P62996	Tra2b	2	0	3	0			Transformer-2 protein homolog beta
P63001	Rac1	7	0	48	0			Ras-related C3 botulinum toxin substrate 1
P63005	Pafah1b1	27	0	92	0			Platelet-activating factor acetylhydrolase IB subunit alpha
P63011	Rab3a	16	0	79	0			Ras-related protein Rab-3A
P63017	Hspa8	635	0	594	0			Heat shock cognate 71 kDa protein
P63024	Vamp3	9	0	54	0			Vesicle-associated membrane protein 3
P63028	Tpt1	10	0	10	0			Translationally-controlled tumor protein
P63034	Cyth2			1	0			Cytohesin-2
P63037	Dnaja1	13	0	15	0			DnaJ homolog subfamily A member 1
P63040	Cplx1			12	0			Complexin-1
P63044	Vamp2	9	0	79	0			Vesicle-associated membrane protein 2
P63046	Sult4a1			2	0			Sulfotransferase 4A1
P63054	Pcp4			20	0			Purkinje cell protein 4
P63073	Eif4e	4	0	7	0			Eukaryotic translation initiation factor 4E
P63078	Gng8			7	0			Guanine nucleotide-binding protein G(I)/G(S)/G(O) subunit gamma-8
P63080	Gabrb3			11	0			Gamma-aminobutyric acid receptor subunit beta-3
P63082	Atp6v0c			2	0			V-type proton ATPase 16 kDa proteolipid subunit
P63084	S100a5			27	0			Protein S100-A5
P63085	Mapk1	10	0	70	0			Mitogen-activated protein kinase 1
P63087	Ppp1cc	36	0	77	0			Serine/threonine-protein phosphatase PP1-gamma catalytic subunit
P63089	Ptn			8	0			Pleiotrophin
P63094	Gnas	24	0	59	0			Guanine nucleotide-binding protein G(s) subunit alpha isoforms short
P63101	Ywhaz	212	0	336	0			14-3-3 protein zeta/delta
P63137	Gabrb2			12	0			Gamma-aminobutyric acid receptor subunit beta-2
P63141	Kcna2			1	0			Potassium voltage-gated channel subfamily A member 2
P63147	Ube2b			1	0			Ubiquitin-conjugating enzyme E2 B
P63158	Hmgb1	10	0	72	0			High mobility group protein B1
P63163	Snrpn	3	0	9	0			Small nuclear ribonucleoprotein-associated protein N
P63166	Sumo1			1	0			Small ubiquitin-related modifier 1
P63168	Dynll1	8	0	51	0			Dynein light chain 1, cytoplasmic
P63213	Gng2			13	0			Guanine nucleotide-binding protein G(I)/G(S)/G(O) subunit gamma-2
P63242	Eif5a	38	0	12	0			Eukaryotic translation initiation factor 5A-1
P63276	Rps17	6	0	4	0			40S ribosomal protein S17
P63280	Ube2i	4	0	3	0			SUMO-conjugating enzyme UBC9
P63318	Prkcg			32	0			Protein kinase C gamma type
P63321	Rala	9	0	53	0			Ras-related protein Ral-A
P63323	Rps12	1	0	6	0			40S ribosomal protein S12
P63325	Rps10	12	0	11	0			40S ribosomal protein S10
P63328	Ppp3ca			102	0			Serine/threonine-protein phosphatase 2B catalytic subunit alpha isoform
P63330	Ppp2ca	3	0	44	0			Serine/threonine-protein phosphatase 2A catalytic subunit alpha isoform
P67778	Phb	28	0	38	0			Prohibitin
P67871	Csnk2b	2	0	7	0			Casein kinase II subunit beta
P67984	Rpl22	12	0	37	0			60S ribosomal protein L22
P68037	Ube2l3	6	0	3	0			Ubiquitin-conjugating enzyme E2 L3
P68040	Gnb2l1	45	0	47	0			Guanine nucleotide-binding protein subunit beta-2-like 1
P68181	Prkacb	3	0	12	0			cAMP-dependent protein kinase catalytic subunit beta
P68254	Ywhaq	119	0	200	0			14-3-3 protein theta
P68372	Tubb4b	155	0	702	0			Tubulin beta-4B chain
P68404	Prkcb			52	0			Protein kinase C beta type
P68433	Hist1h3a	4	0	28	0			Histone H3.1
P68510	Ywhah	27	0	126	0			14-3-3 protein eta
P70122	Sbds	2	0	1	0			Ribosome maturation protein SBDS
P70124	Serpinb5	7	0	1	0			Serpin B5
P70166	Cpeb1	37	0	7	0			Cytoplasmic polyadenylation element-binding protein 1
P70168	Kpnb1	57	0	26	0			Importin subunit beta-1
P70175	Dlg3			27	0			Disks large homolog 3
P70181	Pip5k1b			1	0			Phosphatidylinositol 4-phosphate 5-kinase type-1 beta
P70182	Pip5k1a			6	0			Phosphatidylinositol 4-phosphate 5-kinase type-1 alpha
P70195	Psmb7	1	0	5	0			Proteasome subunit beta type-7
P70202	Lxn			12	0			Latexin
P70206	Plxna1	1	0					Plexin-A1
P70227	Itpr3			2	0			Inositol 1,4,5-trisphosphate receptor type 3
P70248	Myo1f	1	0					Unconventional myosin-If
P70278	Stra8			1	0			Stimulated by retinoic acid gene 8 protein
P70280	Vamp7	6	0	4	0			Vesicle-associated membrane protein 7
P70288	Hdac2	2	0	1	0			Histone deacetylase 2
P70296	Pebp1	70	0	153	0			Phosphatidylethanolamine-binding protein 1
P70297	Stam			3	0			Signal transducing adapter molecule 1
P70303	Ctps2	7	0	2	0			CTP synthase 2
P70313	Nos3	0	1					Nitric oxide synthase, endothelial
P70318	Tial1	3	0	1	0			Nucleolysin TIAR
P70333	Hnrnph2	8	0	51	0			Heterogeneous nuclear ribonucleoprotein H2
P70335	Rock1	8	0	4	0			Rho-associated protein kinase 1
P70336	Rock2	7	0	8	0			Rho-associated protein kinase 2
P70349	Hint1	19	0	30	0			Histidine triad nucleotide-binding protein 1
P70362	Ufd1l	4	0					Ubiquitin fusion degradation protein 1 homolog
P70372	Elavl1	3	0	6	0			ELAV-like protein 1
P70379	Fgf14			1	0			Fibroblast growth factor 14
P70398	Usp9x	34	0	25	0			Probable ubiquitin carboxyl-terminal hydrolase FAF-X
P70399	Tp53bp1			4	0			Tumor suppressor p53-binding protein 1
P70404	Idh3g	9	0	29	0			Isocitrate dehydrogenase [NAD] subunit gamma 1, mitochondrial
P70412	Cuzd1	1	0					CUB and zona pellucida-like domain-containing protein 1
P70414	Slc8a1			11	0			Sodium/calcium exchanger 1
P70424	Erbb2	1	0	1	0			Receptor tyrosine-protein kinase erbB-2
P70441	Slc9a3r1			11	0			Na(+)/H(+) exchange regulatory cofactor NHE-RF1
P70445	Eif4ebp2			1	0			Eukaryotic translation initiation factor 4E-binding protein 2
P70663	Sparcl1			1	0			SPARC-like protein 1
P70669	Phex	2	0					Metalloendopeptidase homolog PEX
P70670	Naca	13	0	29	0			Nascent polypeptide-associated complex subunit alpha, muscle-specific form
P70695	Fbp2	2	0	1	0			Fructose-1,6-bisphosphatase isozyme 2
P70696	Hist1h2ba			9	0			Histone H2B type 1-A
P70697	Urod			1	0			Uroporphyrinogen decarboxylase
P70698	Ctps1	32	0	6	0			CTP synthase 1
P70699	Gaa	1	0	2	0			Lysosomal alpha-glucosidase
P80313	Cct7	34	0	49	0			T-complex protein 1 subunit eta
P80314	Cct2	43	0	25	0			T-complex protein 1 subunit beta
P80315	Cct4	31	0	68	0			T-complex protein 1 subunit delta
P80316	Cct5	34	0	42	0			T-complex protein 1 subunit epsilon
P80317	Cct6a	30	0	48	0			T-complex protein 1 subunit zeta
P80318	Cct3	35	0	79	0			T-complex protein 1 subunit gamma
P83510	Tnik			7	0			Traf2 and NCK-interacting protein kinase
P83741	Wnk1			6	0			Serine/threonine-protein kinase WNK1
P83870	Phf5a	2	0	2	0			PHD finger-like domain-containing protein 5A
P83917	Cbx1	4	0	4	0			Chromobox protein homolog 1
P83940	Tceb1	5	0	8	0			Transcription elongation factor B polypeptide 1
P84075	Hpca	8	0	36	0			Neuron-specific calcium-binding protein hippocalcin
P84078	Arf1	56	0	117	0			ADP-ribosylation factor 1
P84084	Arf5	51	0	68	0			ADP-ribosylation factor 5
P84086	Cplx2			10	0			Complexin-2
P84091	Ap2m1	1	0	73	0			AP-2 complex subunit mu
P84096	Rhog			7	0			Rho-related GTP-binding protein RhoG
P84099	Rpl19	2	0	10	0			60S ribosomal protein L19
P84104	Srsf3	3	0	33	0			Serine/arginine-rich splicing factor 3
P84228	Hist1h3b	39	0	28	0			Histone H3.2
P84244	H3f3a	18	0	30	0			Histone H3.3
P84751	1	3	0					Ig heavy chain Mem5 (Fragment)
P85094	Isoc2a	5	0	2	0			Isochorismatase domain-containing protein 2A, mitochondrial
P85965	Dppa5b	1	0	1	0			Developmental pluripotency-associated protein 5B/5C
P86048	Rpl10l			8	0			60S ribosomal protein L10-like
P97290	Serping1	2	0					Plasma protease C1 inhibitor
P97298	Serpinf1	2	0					Pigment epithelium-derived factor
P97300	Nptn	2	0	58	0			Neuroplastin
P97310	Mcm2	16	0	3	0			DNA replication licensing factor MCM2
P97311	Mcm6	11	0	5	0			DNA replication licensing factor MCM6
P97314	Csrp2	1	0	1	0			Cysteine and glycine-rich protein 2
P97315	Csrp1	17	0	40	0			Cysteine and glycine-rich protein 1
P97323	Fbp3	3	0	2	0			Fructose-1,6-bisphosphatase isozyme 3 (Fragment)
P97324	G6pd2	30	0	17	0			Glucose-6-phosphate 1-dehydrogenase 2
P97333	Nrp1			1	0			Neuropilin-1
P97350	Pkp1	33	0	20	0			Plakophilin-1
P97351	Rps3a	11	0	23	0			40S ribosomal protein S3a
P97352	S100a13			7	0			Protein S100-A13
P97355	Sms	8	0	2	0			Spermine synthase
P97370	Atp1b3	4	0	2	0			Sodium/potassium-transporting ATPase subunit beta-3
P97371	Psme1	3	0	8	0			Proteasome activator complex subunit 1
P97372	Psme2	3	0	3	0			Proteasome activator complex subunit 2
P97377	Cdk2	2	0					Cyclin-dependent kinase 2
P97379	G3bp2	15	0	5	0			Ras GTPase-activating protein-binding protein 2
P97384	Anxa11	2	0	2	0			Annexin A11
P97390	Vps45	1	0	1	0			Vacuolar protein sorting-associated protein 45
P97401	Frzb			1	0			Secreted frizzled-related protein 3
P97411	Ica1	1	0					Islet cell autoantigen 1
P97427	Crmp1	13	0	265	0			Dihydropyrimidinase-related protein 1
P97429	Anxa4	15	0	2	0			Annexin A4
P97441	Slc30a3	1	0	9	0			Zinc transporter 3
P97445	Cacna1a	1	1	2	0			Voltage-dependent P/Q-type calcium channel subunit alpha-1A
P97447	Fhl1	19	0	5	0			Four and a half LIM domains protein 1
P97449	Anpep	3	0	1	0			Aminopeptidase N
P97450	Atp5j			56	0			ATP synthase-coupling factor 6, mitochondrial
P97457	Mylpf	11	0					Myosin regulatory light chain 2, skeletal muscle isoform
P97461	Rps5	4	0	10	0			40S ribosomal protein S5
P97470	Ppp4c	1	0	2	0			Serine/threonine-protein phosphatase 4 catalytic subunit
P97480	Eya3			1	0			Eyes absent homolog 3
P97493	Txn2	1	0	3	0			Thioredoxin, mitochondrial
P97496	Smarcc1	2	0					SWI/SNF complex subunit SMARCC1
P97742	Cpt1a			1	0			Carnitine O-palmitoyltransferase 1, liver isoform
P97760	Polr2c	1	0					DNA-directed RNA polymerase II subunit RPB3
P97765	Wbp2			3	0			WW domain-binding protein 2
P97772	Grm1			5	0			Metabotropic glutamate receptor 1
P97792	Cxadr			1	0			Coxsackievirus and adenovirus receptor homolog
P97793	Alk	1	0					ALK tyrosine kinase receptor
P97797	Sirpa			18	0			Tyrosine-protein phosphatase non-receptor type substrate 1
P97817	Cdr2	1	0					Cerebellar degeneration-related protein 2
P97819	Pla2g6	2	0					85/88 kDa calcium-independent phospholipase A2
P97820	Map4k4	1	0	3	0			Mitogen-activated protein kinase kinase kinase kinase 4
P97822	Anp32e			21	0			Acidic leucine-rich nuclear phosphoprotein 32 family member E
P97823	Lypla1	8	0	5	0			Acyl-protein thioesterase 1
P97825	Hn1	8	0	1	0			Hematological and neurological expressed 1 protein
P97855	G3bp1	3	0					Ras GTPase-activating protein-binding protein 1
P97872	Fmo5			1	0			Dimethylaniline monooxygenase [N-oxide-forming] 5
P97929	Brca2	1	0					Breast cancer type 2 susceptibility protein homolog
P97930	Dtymk	1	0					Thymidylate kinase
P97950	Rab33a	1	0	1	0			Ras-related protein Rab-33A
P97952	Scn1b			2	0			Sodium channel subunit beta-1
P98078	Dab2	3	0					Disabled homolog 2
P98156	Vldlr	1	1					Very low-density lipoprotein receptor
P98192	Gnpat	6	0					Dihydroxyacetone phosphate acyltransferase
P98200	Atp8a2			1	0			Probable phospholipid-transporting ATPase IB
P98203	Arvcf	1	0	1	0			Armadillo repeat protein deleted in velo-cardio-facial syndrome homolog
P99024	Tubb5	141	0	679	0			Tubulin beta-5 chain
P99026	Psmb4	2	0	25	0			Proteasome subunit beta type-4
P99027	Rplp2	55	0	61	0			60S acidic ribosomal protein P2
P99028	Uqcrh			22	0			Cytochrome b-c1 complex subunit 6, mitochondrial
P99029	Prdx5	65	0	89	0			Peroxiredoxin-5, mitochondrial
Q00262	Stx2	3	0					Syntaxin-2
Q00493	Cpe			4	0			Carboxypeptidase E
Q00558	F8a1	1	0					Factor VIII intron 22 protein
Q00612	G6pdx	77	0	53	0			Glucose-6-phosphate 1-dehydrogenase X
Q00623	Apoa1	11	0	2	0			Apolipoprotein A-I
Q00896	Serpina1c	64	0					Alpha-1-antitrypsin 1-3
Q00897	Serpina1d	46	0					Alpha-1-antitrypsin 1-4
Q00898	Serpina1e	28	0					Alpha-1-antitrypsin 1-5
Q00915	Rbp1	2	0	7	0			Retinol-binding protein 1
Q00PI9	Hnrnpul2	9	0	25	0			Heterogeneous nuclear ribonucleoprotein U-like protein 2
Q01063	Pde4d			6	0			cAMP-specific 3',5'-cyclic phosphodiesterase 4D
Q01065	Pde1b			8	0			Calcium/calmodulin-dependent 3',5'-cyclic nucleotide phosphodiesterase 1B
Q01097	Grin2b			6	0			Glutamate receptor ionotropic, NMDA 2B
Q01147	Creb1			2	0			Cyclic AMP-responsive element-binding protein 1
Q01149	Col1a2	3	0					Collagen alpha-2(I) chain
Q01279	Egfr	2	0	1	0			Epidermal growth factor receptor
Q01320	Top2a	3	0					DNA topoisomerase 2-alpha
Q01405	Sec23a	14	0	7	0			Protein transport protein Sec23A
Q01730	Rsu1	2	0	2	0			Ras suppressor protein 1
Q01768	Nme2	35	0	84	0			Nucleoside diphosphate kinase B
Q01815	Cacna1c			1	0			Voltage-dependent L-type calcium channel subunit alpha-1C
Q01853	Vcp	127	0	282	0			Transitional endoplasmic reticulum ATPase
Q02013	Aqp1			3	0			Aquaporin-1
Q02053	Uba1	204	0	318	0			Ubiquitin-like modifier-activating enzyme 1
Q02248	Ctnnb1	47	0	43	0			Catenin beta-1
Q02257	Jup	343	0	132	0			Junction plakoglobin
Q02357	Ank1			15	0			Ankyrin-1
Q02819	Nucb1	6	0	1	0			Nucleobindin-1
Q03137	Epha4			3	0			Ephrin type-A receptor 4
Q03141	Mark3	2	0					MAP/microtubule affinity-regulating kinase 3
Q03517	Scg2			6	0			Secretogranin-2
Q03734	Serpina3m	13	0					Serine protease inhibitor A3M
Q03958	Pfdn6	8	0					Prefoldin subunit 6
Q04207	Rela	1	0					Transcription factor p65
Q04447	Ckb	183	0	679	0			Creatine kinase B-type
Q04736	Yes1			2	0			Tyrosine-protein kinase Yes
Q04750	Top1			2	0			DNA topoisomerase 1
Q04857	Col6a1			5	0			Collagen alpha-1(VI) chain
Q05144	Rac2	7	0	28	0			Ras-related C3 botulinum toxin substrate 2
Q05512	Mark2	2	0	4	0			Serine/threonine-protein kinase MARK2
Q05793	Hspg2			2	0			Basement membrane-specific heparan sulfate proteoglycan core protein
Q05816	Fabp5	5	0	33	0			Fatty acid-binding protein, epidermal
Q05909	Ptprg	1	0					Receptor-type tyrosine-protein phosphatase gamma
Q05920	Pc	35	0	70	0			Pyruvate carboxylase, mitochondrial
Q05A80	Caprin2	18	0	1	0			Caprin-2
Q05BC3	Eml1			2	0			Echinoderm microtubule-associated protein-like 1
Q05D44	Eif5b	3	0					Eukaryotic translation initiation factor 5B
Q06138	Cab39			1	0			Calcium-binding protein 39
Q06335	Aplp2			2	0			Amyloid-like protein 2
Q06770	Serpina6	3	0					Corticosteroid-binding globulin
Q06890	Clu	24	0	19	0			Clusterin
Q07076	Anxa7	25	0	19	0			Annexin A7
Q07105	Gdf9	3	0	1	0			Growth/differentiation factor 9
Q07133	Hist1h1t	23	0	27	0			Histone H1t
Q07235	Serpine2			2	0			Glia-derived nexin
Q07813	Bax	2	0	3	0			Apoptosis regulator BAX
Q07832	Plk1	6	0					Serine/threonine-protein kinase PLK1
Q08093	Cnn2	2	0					Calponin-2
Q08189	Tgm3	1	0	2	0			Protein-glutamine gamma-glutamyltransferase E
Q08274	Dmwd			1	0			Dystrophia myotonica WD repeat-containing protein
Q08297	Rad51	1	0					DNA repair protein RAD51 homolog 1
Q08331	Calb2	5	0	82	0			Calretinin
Q08481	Pecam1			0	1			Platelet endothelial cell adhesion molecule
Q08509	Eps8	6	0	2	0			Epidermal growth factor receptor kinase substrate 8
Q08642	Padi2	6	0	5	0			Protein-arginine deiminase type-2
Q08857	Cd36	8	0					Platelet glycoprotein 4
Q08943	Ssrp1	15	0	2	0			FACT complex subunit SSRP1
Q0GA42	Cnnm1			1	0			Metal transporter CNNM1
Q0VBF8	2			1	0			Uncharacterized membrane protein C1orf95 homolog
Q0VE82	Cpne7	4	0	16	0			Copine-7
Q0VF22	Ccdc138	1	0					Coiled-coil domain-containing protein 138
Q0VGT2	Gli2			1	0			Zinc finger protein GLI2
Q0VGY8	Tanc1	1	0	1	0			Protein TANC1
Q11011	Npepps	35	0	176	0			Puromycin-sensitive aminopeptidase
Q11136	Pepd	1	0	1	0			Xaa-Pro dipeptidase
Q148V7	Kiaa1468	17	0	2	0			LisH domain and HEAT repeat-containing protein KIAA1468
Q149C2	Traf3ip1			1	0			TRAF3-interacting protein 1
Q149F3	Gspt2	6	0	1	0			Eukaryotic peptide chain release factor GTP-binding subunit ERF3B
Q14B46	Rtkn2			1	0			Rhotekin-2
Q14BB9	Map6d1			7	0			MAP6 domain-containing protein 1
Q14BI2	Grm2			4	0			Metabotropic glutamate receptor 2
Q14BI7	Tdrd9	1	0					Putative ATP-dependent RNA helicase TDRD9
Q19LI2	A1bg	22	0					Alpha-1B-glycoprotein
Q1RLL3	Cpne9	4	0	17	0			Copine-9
Q2HXL6	Edem3	1	0					ER degradation-enhancing alpha-mannosidase-like protein 3
Q2KN98	Specc1l	3	0					Cytospin-A
Q2M3X8	Phactr1			1	0			Phosphatase and actin regulator 1
Q2NL51	Gsk3a			13	0			Glycogen synthase kinase-3 alpha
Q2PFD7	Psd3			26	0			PH and SEC7 domain-containing protein 3
Q2TB54	Fcamr	1	1					High affinity immunoglobulin alpha and immunoglobulin mu Fc receptor
Q2TBE6	Pi4k2a	1	0					Phosphatidylinositol 4-kinase type 2-alpha
Q2TPA8	Hsdl2	4	0					Hydroxysteroid dehydrogenase-like protein 2
Q2VIS4	Flg2			7	0			Filaggrin-2
Q32M21	Gsdma2	2	0	8	0			Gasdermin-A2
Q32Q92	Acot6			1	0			Acyl-coenzyme A thioesterase 6
Q3B7Z2	Osbp	14	0	3	0			Oxysterol-binding protein 1
Q3KNM2	44990	27	0	13	0			E3 ubiquitin-protein ligase MARCH5
Q3TC33	Ccdc127			2	0			Coiled-coil domain-containing protein 127
Q3TC72	Fahd2	10	0	18	0			Fumarylacetoacetate hydrolase domain-containing protein 2A
Q3TCH7	Cul4a	31	0	3	0			Cullin-4A
Q3TDD9	Ppp1r21	1	0					Protein phosphatase 1 regulatory subunit 21
Q3TDK6	Rogdi			1	0			Protein rogdi homolog
Q3TDQ1	Stt3b	9	0	1	0			Dolichyl-diphosphooligosaccharide--protein glycosyltransferase subunit STT3B
Q3TEA8	Hp1bp3			41	0			Heterochromatin protein 1-binding protein 3
Q3TES0	Iqsec3			8	0			IQ motif and SEC7 domain-containing protein 3
Q3TFD2	Lpcat1			3	0			Lysophosphatidylcholine acyltransferase 1
Q3TGF2	Fam107b	4	0					Protein FAM107B
Q3THE2	Myl12b	15	0	29	0			Myosin regulatory light chain 12B
Q3THG9	Aarsd1	7	0	1	0			Alanyl-tRNA editing protein Aarsd1
Q3THK3	Gtf2f1			1	0			General transcription factor IIF subunit 1
Q3THK7	Gmps	26	0	16	0			GMP synthase [glutamine-hydrolyzing]
Q3THS6	Mat2a	4	0	18	0			S-adenosylmethionine synthase isoform type-2
Q3TI53	Schip1			1	0			Schwannomin-interacting protein 1
Q3TIV5	Zc3h15	2	0					Zinc finger CCCH domain-containing protein 15
Q3TJD7	Pdlim7	1	0					PDZ and LIM domain protein 7
Q3TJZ6	Fam98a	1	0	1	0			Protein FAM98A
Q3TKR3	Nlrp4c	9	0	6	0			NACHT, LRR and PYD domains-containing protein 4C
Q3TKT4	Smarca4	1	0	1	0			Transcription activator BRG1
Q3TLH4	Prrc2c			1	0			Protein PRRC2C
Q3TMH2	Scrn3	1	0					Secernin-3
Q3TPJ7	Midn	1	1					Midnolin
Q3TQF0	Fbxo31	1	1					F-box only protein 31
Q3TRM4	Pnpla6	3	0					Neuropathy target esterase
Q3TRM8	Hk3	1	0	5	0			Hexokinase-3
Q3TSG4	Alkbh5	1	0	1	0			RNA demethylase ALKBH5
Q3TT38	D17Wsu92e			1	0			Uncharacterized protein C6orf106 homolog
Q3TW96	Uap1l1	1	0					UDP-N-acetylhexosamine pyrophosphorylase-like protein 1
Q3TWL2	Tmem55b	2	0					Type 1 phosphatidylinositol 4,5-bisphosphate 4-phosphatase
Q3TXS7	Psmd1	16	0	13	0			26S proteasome non-ATPase regulatory subunit 1
Q3TXX4	Slc17a7			25	0			Vesicular glutamate transporter 1
Q3TY60	Fam131b			3	0			Protein FAM131B
Q3TYX3	Smyd5			1	0			SET and MYND domain-containing protein 5
Q3U0D9	Hace1	2	0					E3 ubiquitin-protein ligase HACE1
Q3U0J8	Tbc1d2b	1	1					TBC1 domain family member 2B
Q3U0V1	Khsrp	1	0	52	0			Far upstream element-binding protein 2
Q3U186	Rars2	2	0					Probable arginine--tRNA ligase, mitochondrial
Q3U1D0	Lins	1	1					Protein Lines homolog
Q3U1J0	Slc38a5	2	0	1	0			Sodium-coupled neutral amino acid transporter 5
Q3U1T9	Dennd1b			1	0			DENN domain-containing protein 1B
Q3U1Y4	Dennd4b	0	1					DENN domain-containing protein 4B
Q3U2I3	Fam160a2	1	1					FTS and Hook-interacting protein
Q3U2S4	Otud5	0	1					OTU domain-containing protein 5
Q3U487	Hectd3	2	0	1	0			E3 ubiquitin-protein ligase HECTD3
Q3U4G3	Xxylt1	0	2					Xyloside xylosyltransferase 1
Q3U5C8	Arhgef16	6	0					Rho guanine nucleotide exchange factor 16
Q3U5Q7	Cmpk2			1	0			UMP-CMP kinase 2, mitochondrial
Q3U7R1	Esyt1	26	0	4	0			Extended synaptotagmin-1
Q3U7U3	Fbxo7	8	0					F-box only protein 7
Q3U898	Myeov2	1	0					Myeloma-overexpressed gene 2 protein homolog
Q3UA06	Trip13	5	0					Pachytene checkpoint protein 2 homolog
Q3UA16	Spc25	1	0					Kinetochore protein Spc25
Q3UA37	Qrich1	1	0					Glutamine-rich protein 1
Q3UBX0	Tmem109	2	0	7	0			Transmembrane protein 109
Q3UCV8	Fam105b	1	0					Ubiquitin thioesterase otulin
Q3UDE2	Ttll12	14	0	5	0			Tubulin--tyrosine ligase-like protein 12
Q3UEB3	Puf60	16	0	12	0			Poly(U)-binding-splicing factor PUF60
Q3UFS4	Gpatch11	0	1					G patch domain-containing protein 11
Q3UGC7	Eif3j1	6	0	3	0			Eukaryotic translation initiation factor 3 subunit J-A
Q3UGR5	Hdhd2	5	0	4	0			Haloacid dehalogenase-like hydrolase domain-containing protein 2
Q3UGS4	Fam195b			1	0			Protein FAM195B
Q3UH53	Sdk1	1	0					Protein sidekick-1
Q3UH60	Dip2b			2	0			Disco-interacting protein 2 homolog B
Q3UH66	Wnk2	1	0	5	0			Serine/threonine-protein kinase WNK2
Q3UHB1	Nt5dc3			7	0			5'-nucleotidase domain-containing protein 3
Q3UHD6	Snx27			3	0			Sorting nexin-27
Q3UHD9	Agap2			11	0			Arf-GAP with GTPase, ANK repeat and PH domain-containing protein 2
Q3UHH8	Gxylt1	1	0					Glucoside xylosyltransferase 1
Q3UHI0	Ccser2	2	0					Serine-rich coiled-coil domain-containing protein 2
Q3UHJ0	Aak1			105	0			AP2-associated protein kinase 1
Q3UHK6	Tenm4	9	0	13	0			Teneurin-4
Q3UHL1	Camkv			73	0			CaM kinase-like vesicle-associated protein
Q3UHQ6	Dopey2	10	0	5	0			Protein dopey-2
Q3UHX0	Nol8			1	0			Nucleolar protein 8
Q3UHX2	Pdap1			13	0			28 kDa heat- and acid-stable phosphoprotein
Q3UIU2	Ndufb6			3	0			NADH dehydrogenase [ubiquinone] 1 beta subcomplex subunit 6
Q3UJB9	Edc4	35	0	4	0			Enhancer of mRNA-decapping protein 4
Q3UJD6	Usp19	7	0					Ubiquitin carboxyl-terminal hydrolase 19
Q3UJU9	Rmdn3	11	0	7	0			Regulator of microtubule dynamics protein 3
Q3UKC1	Tax1bp1	10	0	1	0			Tax1-binding protein 1 homolog
Q3ULA2	Btrc	1	0	1	0			F-box/WD repeat-containing protein 1A
Q3ULD5	Mccc2			5	0			Methylcrotonoyl-CoA carboxylase beta chain, mitochondrial
Q3ULJ0	Gpd1l	2	0	21	0			Glycerol-3-phosphate dehydrogenase 1-like protein
Q3ULM6	Uspl1	1	0					SUMO-specific isopeptidase USPL1
Q3UM29	Cog7			1	0			Conserved oligomeric Golgi complex subunit 7
Q3UM45	Ppp1r7	12	0	40	0			Protein phosphatase 1 regulatory subunit 7
Q3UMC0	Spata5	4	0					Spermatogenesis-associated protein 5
Q3UMF0	Cobll1	4	0	2	0			Cordon-bleu protein-like 1
Q3UMR0	Ankrd27	2	0					Ankyrin repeat domain-containing protein 27
Q3UMR5	Mcu			11	0			Calcium uniporter protein, mitochondrial
Q3UMU9	Hdgfrp2			6	0			Hepatoma-derived growth factor-related protein 2
Q3UMY5	Eml4	2	0	1	0			Echinoderm microtubule-associated protein-like 4
Q3UN02	Lclat1			2	0			Lysocardiolipin acyltransferase 1
Q3UNH4	Gprin1			29	0			G protein-regulated inducer of neurite outgrowth 1
Q3UNZ8	1			1	0			Quinone oxidoreductase-like protein 2
Q3UPH1	Prrc1			1	0			Protein PRRC1
Q3UPL0	Sec31a	26	0	16	0			Protein transport protein Sec31A
Q3UPL5	Ag2			1	0			Uncharacterized protein C11orf96 homolog
Q3UQS8	Rbm20	2	1					RNA-binding protein 20
Q3UQV5	Kbtbd8	8	0	9	0			Kelch repeat and BTB domain-containing protein 8
Q3UR32	P2rx3			5	0			P2X purinoceptor 3
Q3US41	Esrp1	25	0	4	0			Epithelial splicing regulatory protein 1
Q3USB7	Plcl1			1	0			Inactive phospholipase C-like protein 1
Q3USZ8	1	7	0	1	0			Deleted in autism protein 1 homolog
Q3UTA9	Eif4e1b	15	0	5	0			Eukaryotic translation initiation factor 4E type 1B
Q3UTH8	Arhgef9			4	0			Rho guanine nucleotide exchange factor 9
Q3UUG6	Tbc1d24			1	0			TBC1 domain family member 24
Q3UUI3	Them4			2	0			Acyl-coenzyme A thioesterase THEM4
Q3UUJ4	Strada			1	0			STE20-related kinase adapter protein alpha
Q3UUQ7	Pgap1			1	0			GPI inositol-deacylase
Q3UVK0	Ermp1			1	0			Endoplasmic reticulum metallopeptidase 1
Q3UVL4	Vps51	3	0	4	0			Vacuolar protein sorting-associated protein 51 homolog
Q3UVU3	Slc30a10			2	0			Zinc transporter 10
Q3UVX5	Grm5			1	0			Metabotropic glutamate receptor 5
Q3UX10	Tubal3	4	0	97	0			Tubulin alpha chain-like 3
Q3UY34	2			2	0			Uncharacterized protein C12orf43 homolog
Q3UY96	2			1	0			Uncharacterized protein KIAA1751 homolog
Q3UYC0	Ppm1h			3	0			Protein phosphatase 1H
Q3UYH7	Adrbk2			1	0			Beta-adrenergic receptor kinase 2
Q3UZZ6	Sult1d1			2	0			Sulfotransferase 1 family member D1
Q3V0C5	Usp48	3	0	1	0			Ubiquitin carboxyl-terminal hydrolase 48
Q3V0K9	Pls1	37	0	16	0			Plastin-1
Q3V1D3	Ampd1	2	0					AMP deaminase 1
Q3V1L4	Nt5c2	6	0					Cytosolic purine 5'-nucleotidase
Q3V3I2	Gnat3			30	0			Guanine nucleotide-binding protein G(t) subunit alpha-3
Q3V3Q7	Pacs2			2	0			Phosphofurin acidic cluster sorting protein 2
Q3V3R1	Mthfd1l	6	0					Monofunctional C1-tetrahydrofolate synthase, mitochondrial
Q497V5	Srbd1			1	0			S1 RNA-binding domain-containing protein 1
Q4ACU6	Shank3			1	0			SH3 and multiple ankyrin repeat domains protein 3
Q4FZG7	Timm8a2	1	0	1	0			Putative mitochondrial import inner membrane translocase subunit Tim8 A-B
Q4FZG8	Oosp2	2	0					Oocyte-secreted protein 2
Q4G5Y1	Klhdc2	1	0					Kelch domain-containing protein 2
Q4KML4	Abracl			3	0			Costars family protein ABRACL
Q4KMM3	Oxr1	5	0	86	0			Oxidation resistance protein 1
Q4KWH5	Plch1	1	0	2	0			1-phosphatidylinositol 4,5-bisphosphate phosphodiesterase eta-1
Q4LFA9	Sema3g			1	0			Semaphorin-3G
Q4V9Z5	Sez6l2			1	0			Seizure 6-like protein 2
Q4VAA2	Cdv3	8	0	5	0			Protein CDV3
Q4VAE3	Tmem65			7	0			Transmembrane protein 65
Q501J6	Ddx17	6	0	42	0			Probable ATP-dependent RNA helicase DDX17
Q505B7	Zbtb8os	1	0	2	0			Protein archease
Q505D1	Ankrd28	1	0					Serine/threonine-protein phosphatase 6 regulatory ankyrin repeat subunit A
Q505D7	Opa3			4	0			Optic atrophy 3 protein homolog
Q505F5	Lrrc47	17	0	3	0			Leucine-rich repeat-containing protein 47
Q505K2	Fam160a1	11	0					Protein FAM160A1
Q50H33	Kctd8			4	0			BTB/POZ domain-containing protein KCTD8
Q52KF3	Spire1	1	0					Protein spire homolog 1
Q52KI8	Srrm1			1	0			Serine/arginine repetitive matrix protein 1
Q569Z5	Ddx46	2	0					Probable ATP-dependent RNA helicase DDX46
Q571C7	Bdp1	1	0					Transcription factor TFIIIB component B'' homolog
Q571I9	Aldh16a1	3	0					Aldehyde dehydrogenase family 16 member A1
Q58A65	Spag9			1	0			C-Jun-amino-terminal kinase-interacting protein 4
Q59J78	Ndufaf2			2	0			Mimitin, mitochondrial
Q5BL07	Pex1	6	0					Peroxisome biogenesis factor 1
Q5DTL9	Slc4a10			10	0			Sodium-driven chloride bicarbonate exchanger
Q5DTY9	Kctd16	1	0	3	0			BTB/POZ domain-containing protein KCTD16
Q5DU25	Iqsec2			15	0			IQ motif and SEC7 domain-containing protein 2
Q5DU31	Ipcef1			1	0			Interactor protein for cytohesin exchange factors 1
Q5DU57	Spata13			1	0			Spermatogenesis-associated protein 13
Q5DW34	Ehmt1			1	0			Histone-lysine N-methyltransferase EHMT1
Q5EBG6	Hspb6	3	0					Heat shock protein beta-6
Q5EBJ4	Ermn			2	0			Ermin
Q5EG47	Prkaa1	3	0					5'-AMP-activated protein kinase catalytic subunit alpha-1
Q5F285	Tmem256			1	0			Transmembrane protein 256
Q5FWK3	Arhgap1	1	0	26	0			Rho GTPase-activating protein 1
Q5HZI1	Mtus1	1	0					Microtubule-associated tumor suppressor 1 homolog
Q5HZJ5	Fam189b			1	0			Protein FAM189B
Q5I2A0	Serpina3g	1	0					Serine protease inhibitor A3G
Q5M8N0	Cnrip1			16	0			CB1 cannabinoid receptor-interacting protein 1
Q5M8N4	Sdr39u1			1	0			Epimerase family protein SDR39U1
Q5NBX1	Cobl	1	0					Protein cordon-bleu
Q5NCF2	Trappc1			1	0			Trafficking protein particle complex subunit 1
Q5ND34	Wdr81	1	0	5	0			WD repeat-containing protein 81
Q5PR73	Diras2			6	0			GTP-binding protein Di-Ras2
Q5RJH6	Smg7	1	0					Protein SMG7
Q5RJI5	Brsk1			5	0			Serine/threonine-protein kinase BRSK1
Q5SF07	Igf2bp2	47	0	20	0			Insulin-like growth factor 2 mRNA-binding protein 2
Q5SFM8	Rbm27	1	0					RNA-binding protein 27
Q5SNZ0	Ccdc88a	1	1					Girdin
Q5SQX6	Cyfip2	3	0	41	0			Cytoplasmic FMR1-interacting protein 2
Q5SRX1	Tom1l2	1	0	21	0			TOM1-like protein 2
Q5SS00	Zdbf2	1	1					DBF4-type zinc finger-containing protein 2 homolog
Q5SS80	Dhrs13	2	0					Dehydrogenase/reductase SDR family member 13
Q5SSL4	Abr	5	0	14	0			Active breakpoint cluster region-related protein
Q5SSW2	Psme4	1	0					Proteasome activator complex subunit 4
Q5SUC9	Sco1	1	0					Protein SCO1 homolog, mitochondrial
Q5SUR0	Pfas	8	0	3	0			Phosphoribosylformylglycinamidine synthase
Q5SV42	Serpinb1c	1	0	2	0			Leukocyte elastase inhibitor C
Q5SVL6	Rap1gap2			8	0			Rap1 GTPase-activating protein 2
Q5SVR0	Tbc1d9b	1	0					TBC1 domain family member 9B
Q5SW19	Cluh	2	0					Clustered mitochondria protein homolog
Q5SWT3	Slc25a35	4	0					Solute carrier family 25 member 35
Q5SWU9	Acaca			2	0			Acetyl-CoA carboxylase 1
Q5SWY7	Fam83g	7	0					Protein FAM83G
Q5SYH2	Tmem199	2	0					Transmembrane protein 199
Q5U3K5	Rabl6			8	0			Rab-like protein 6
Q5U430	Ubr3	1	0					E3 ubiquitin-protein ligase UBR3
Q5U458	Dnajc11	1	0	3	0			DnaJ homolog subfamily C member 11
Q5U4C9	Dyrk2	1	0					Dual specificity tyrosine-phosphorylation-regulated kinase 2
Q5U4F6	Wdr34	1	0					WD repeat-containing protein 34
Q5XG69	Fam169a	1	0	12	0			Soluble lamin-associated protein of 75 kDa
Q5XJY4	Parl	13	0	2	0			Presenilins-associated rhomboid-like protein, mitochondrial
Q5XJY5	Arcn1	9	0	6	0			Coatomer subunit delta
Q5XKE0	Mybpc2	3	0					Myosin-binding protein C, fast-type
Q5XPI3	Rnf123	2	0					E3 ubiquitin-protein ligase RNF123
Q5Y4Y6	Gsdma3	2	0	8	0			Gasdermin-A3
Q60519	Sema5b	1	0					Semaphorin-5B
Q60575	Kif1b			2	0			Kinesin-like protein KIF1B
Q60598	Cttn	3	0	32	0			Src substrate cortactin
Q60605	Myl6	17	0	39	0			Myosin light polypeptide 6
Q60610	Tiam1			1	0			T-lymphoma invasion and metastasis-inducing protein 1
Q60625	Icam5			14	0			Intercellular adhesion molecule 5
Q60629	Epha5			2	0			Ephrin type-A receptor 5
Q60631	Grb2			39	0			Growth factor receptor-bound protein 2
Q60634	Flot2			7	0			Flotillin-2
Q60649	Clpb	8	0	1	0			Caseinolytic peptidase B protein homolog
Q60668	Hnrnpd	11	0	40	0			Heterogeneous nuclear ribonucleoprotein D0
Q60676	Ppp5c	8	0	23	0			Serine/threonine-protein phosphatase 5
Q60692	Psmb6	3	0	21	0			Proteasome subunit beta type-6
Q60698	Ski	2	0					Ski oncogene
Q60710	Samhd1	1	0					Deoxynucleoside triphosphate triphosphohydrolase SAMHD1
Q60737	Csnk2a1	5	0	9	0			Casein kinase II subunit alpha
Q60739	Bag1	1	0					BAG family molecular chaperone regulator 1
Q60749	Khdrbs1			8	0			KH domain-containing, RNA-binding, signal transduction-associated protein 1
Q60751	Igf1r	1	0					Insulin-like growth factor 1 receptor
Q60759	Gcdh			1	0			Glutaryl-CoA dehydrogenase, mitochondrial
Q60771	Cldn11			1	0			Claudin-11
Q60780	Gas7			2	0			Growth arrest-specific protein 7
Q60790	Rasa3			9	0			Ras GTPase-activating protein 3
Q60817	Naca	13	0	29	0			Nascent polypeptide-associated complex subunit alpha
Q60823	Akt2			2	0			RAC-beta serine/threonine-protein kinase
Q60829	Ppp1r1b			6	0			Protein phosphatase 1 regulatory subunit 1B
Q60847	Col12a1			5	0			Collagen alpha-1(XII) chain
Q60854	Serpinb6	17	0	4	0			Serpin B6
Q60864	Stip1	43	0	92	0			Stress-induced-phosphoprotein 1
Q60865	Caprin1	3	0	15	0			Caprin-1
Q60866	Pter	1	0					Phosphotriesterase-related protein
Q60870	Reep5			2	0			Receptor expression-enhancing protein 5
Q60872	Eif1a	7	0	3	0			Eukaryotic translation initiation factor 1A
Q60875	Arhgef2			4	0			Rho guanine nucleotide exchange factor 2
Q60899	Elavl2	30	0	20	0			ELAV-like protein 2
Q60900	Elavl3	2	0	19	0			ELAV-like protein 3
Q60902	Eps15l1	11	0	17	0			Epidermal growth factor receptor substrate 15-like 1
Q60930	Vdac2	22	0	137	0			Voltage-dependent anion-selective channel protein 2
Q60931	Vdac3	48	0	122	0			Voltage-dependent anion-selective channel protein 3
Q60936	Adck3	1	0					Chaperone activity of bc1 complex-like, mitochondrial
Q60949	Tbc1d1	3	0					TBC1 domain family member 1
Q60952	Cep250	1	1					Centrosome-associated protein CEP250
Q60960	Kpna1	2	0	6	0			Importin subunit alpha-5
Q60972	Rbbp4	2	0	11	0			Histone-binding protein RBBP4
Q60973	Rbbp7	1	0	11	0			Histone-binding protein RBBP7
Q60992	Vav2			1	0			Guanine nucleotide exchange factor VAV2
Q60994	Adipoq	2	0					Adiponectin
Q60996	Ppp2r5c	2	0	8	0			Serine/threonine-protein phosphatase 2A 56 kDa regulatory subunit gamma isoform
Q60997	Dmbt1	11	0					Deleted in malignant brain tumors 1 protein
Q61011	Gnb3			29	0			Guanine nucleotide-binding protein G(I)/G(S)/G(T) subunit beta-3
Q61016	Gng7			11	0			Guanine nucleotide-binding protein G(I)/G(S)/G(O) subunit gamma-7
Q61029	Tmpo			30	0			Lamina-associated polypeptide 2, isoforms beta/delta/epsilon/gamma
Q61033	Tmpo			17	0			Lamina-associated polypeptide 2, isoforms alpha/zeta
Q61035	Hars	4	0	27	0			Histidine--tRNA ligase, cytoplasmic
Q61036	Pak3	2	0	28	0			Serine/threonine-protein kinase PAK 3
Q61037	Tsc2			1	0			Tuberin
Q61043	Nin	2	0					Ninein
Q61048	Wbp4			1	0			WW domain-binding protein 4
Q61081	Cdc37	8	0	23	0			Hsp90 co-chaperone Cdc37
Q61087	Lamb3	1	1					Laminin subunit beta-3
Q61097	Ksr1			1	0			Kinase suppressor of Ras 1
Q61102	Abcb7	3	0	9	0			ATP-binding cassette sub-family B member 7, mitochondrial
Q61133	Gstt2	3	0	4	0			Glutathione S-transferase theta-2
Q61137	Astn1			5	0			Astrotactin-1
Q61142	Spin1	26	0	9	0			Spindlin-1
Q61144	Psen2	1	0					Presenilin-2
Q61147	Cp	9	0					Ceruloplasmin
Q61151	Ppp2r5e			10	0			Serine/threonine-protein phosphatase 2A 56 kDa regulatory subunit epsilon isoform
Q61152	Ptpn18	2	1	1	0			Tyrosine-protein phosphatase non-receptor type 18
Q61165	Slc9a1			2	0			Sodium/hydrogen exchanger 1
Q61166	Mapre1	12	0	28	0			Microtubule-associated protein RP/EB family member 1
Q61171	Prdx2	76	0	77	0			Peroxiredoxin-2
Q61176	Arg1	18	0					Arginase-1
Q61187	Tsg101			1	0			Tumor susceptibility gene 101 protein
Q61191	Hcfc1	1	0					Host cell factor 1
Q61194	Pik3c2a	1	0					Phosphatidylinositol 4-phosphate 3-kinase C2 domain-containing subunit alpha
Q61205	Pafah1b3	9	0	13	0			Platelet-activating factor acetylhydrolase IB subunit gamma
Q61206	Pafah1b2	4	0	4	0			Platelet-activating factor acetylhydrolase IB subunit beta
Q61207	Psap	2	0	7	0			Sulfated glycoprotein 1
Q61233	Lcp1	67	0	16	0			Plastin-2
Q61234	Snta1			1	0			Alpha-1-syntrophin
Q61239	Fnta	2	0					Protein farnesyltransferase/geranylgeranyltransferase type-1 subunit alpha
Q61247	Serpinf2	2	0					Alpha-2-antiplasmin
Q61249	Igbp1	5	0	5	0			Immunoglobulin-binding protein 1
Q61282	Acan	1	0	3	0			Aggrecan core protein
Q61290	Cacna1e	1	1					Voltage-dependent R-type calcium channel subunit alpha-1E
Q61292	Lamb2			1	0			Laminin subunit beta-2
Q61301	Ctnna2	3	0	16	0			Catenin alpha-2
Q61316	Hspa4	91	0	197	0			Heat shock 70 kDa protein 4
Q61334	Bcap29	2	0					B-cell receptor-associated protein 29
Q61335	Bcap31	4	0					B-cell receptor-associated protein 31
Q61361	Bcan			60	0			Brevican core protein
Q61387	Cox7a2l			3	0			Cytochrome c oxidase subunit 7A-related protein, mitochondrial
Q61390	Cct6b	1	0	7	0			T-complex protein 1 subunit zeta-2
Q61411	Hras	4	0	24	0			GTPase HRas
Q61418	Clcn4			1	0			H(+)/Cl(-) exchange transporter 4
Q61423	Kcna4			1	0			Potassium voltage-gated channel subfamily A member 4
Q61468	Msln	0	1					Mesothelin
Q61475	Cd55	2	0	1	0			Complement decay-accelerating factor, GPI-anchored
Q61481	Pde1a			8	0			Calcium/calmodulin-dependent 3',5'-cyclic nucleotide phosphodiesterase 1A
Q61490	Alcam			15	0			CD166 antigen
Q61495	Dsg1a	6	0	19	0			Desmoglein-1-alpha
Q61496	Ddx4	11	0					Probable ATP-dependent RNA helicase DDX4
Q61527	Erbb4	1	0	1	0			Receptor tyrosine-protein kinase erbB-4
Q61543	Glg1	3	0	2	0			Golgi apparatus protein 1
Q61545	Ewsr1	1	0	29	0			RNA-binding protein EWS
Q61548	Snap91	7	0	155	0			Clathrin coat assembly protein AP180
Q61553	Fscn1	18	0	105	0			Fascin
Q61578	Fdxr			1	0			NADPH:adrenodoxin oxidoreductase, mitochondrial
Q61584	Fxr1	23	0	7	0			Fragile X mental retardation syndrome-related protein 1
Q61595	Ktn1	40	0	1	0			Kinectin
Q61598	Gdi2	104	0	217	0			Rab GDP dissociation inhibitor beta
Q61599	Arhgdib	3	0	5	0			Rho GDP-dissociation inhibitor 2
Q61609	Slc20a1			1	0			Sodium-dependent phosphate transporter 1
Q61625	Grid2			4	0			Glutamate receptor ionotropic, delta-2
Q61644	Pacsin1	1	0	132	0			Protein kinase C and casein kinase substrate in neurons protein 1
Q61646	Hp	2	0					Haptoglobin
Q61655	Ddx19a	30	0	19	0			ATP-dependent RNA helicase DDX19A
Q61656	Ddx5	10	0	69	0			Probable ATP-dependent RNA helicase DDX5
Q61686	Cbx5			2	0			Chromobox protein homolog 5
Q61696	Hspa1a	123	0	115	0			Heat shock 70 kDa protein 1A
Q61699	Hsph1	100	0	71	0			Heat shock protein 105 kDa
Q61701	Elavl4	19	0	13	0			ELAV-like protein 4
Q61703	Itih2	1	0					Inter-alpha-trypsin inhibitor heavy chain H2
Q61733	Mrps31			1	0			28S ribosomal protein S31, mitochondrial
Q61735	Cd47			19	0			Leukocyte surface antigen CD47
Q61739	Itga6	21	0	2	0			Integrin alpha-6
Q61749	Eif2b4	2	0	2	0			Translation initiation factor eIF-2B subunit delta
Q61753	Phgdh	13	0	100	0			D-3-phosphoglycerate dehydrogenase
Q61768	Kif5b	4	0	46	0			Kinesin-1 heavy chain
Q61792	Lasp1			30	0			LIM and SH3 domain protein 1
Q61820	Rasl2-9	16	0	25	0			GTP-binding nuclear protein Ran, testis-specific isoform
Q61831	Mapk10	1	0	1	0			Mitogen-activated protein kinase 10
Q61838	A2m	5	0					Alpha-2-macroglobulin
Q61879	Myh10	30	0	91	0			Myosin-10
Q61881	Mcm7	12	0	1	0			DNA replication licensing factor MCM7
Q61885	Mog			8	0			Myelin-oligodendrocyte glycoprotein
Q61937	Npm1			22	0			Nucleophosmin
Q61941	Nnt			2	0			NAD(P) transhydrogenase, mitochondrial
Q61990	Pcbp2	21	0	58	0			Poly(rC)-binding protein 2
Q62000	Ogn	1	0					Mimecan
Q62005	Zp1	175	0	56	0			Zona pellucida sperm-binding protein 1
Q62009	Postn	1	0					Periostin
Q62018	Ctr9	1	0					RNA polymerase-associated protein CTR9 homolog
Q62028	Pla2r1	4	0					Secretory phospholipase A2 receptor
Q62048	Pea15			4	0			Astrocytic phosphoprotein PEA-15
Q62059	Vcan			23	0			Versican core protein
Q62074	Prkci	1	0					Protein kinase C iota type
Q62083	Pick1			1	0			PRKCA-binding protein
Q62093	Srsf2	4	0	30	0			Serine/arginine-rich splicing factor 2
Q62095	Ddx3y	24	0	19	0			ATP-dependent RNA helicase DDX3Y
Q62108	Dlg4			45	0			Disks large homolog 4
Q62141	Sin3b			4	0			Paired amphipathic helix protein Sin3b
Q62148	Aldh1a2	2	0	1	0			Retinal dehydrogenase 2
Q62159	Rhoc	19	0	44	0			Rho-related GTP-binding protein RhoC
Q62165	Dag1			1	0			Dystroglycan
Q62167	Ddx3x	31	0	23	0			ATP-dependent RNA helicase DDX3X
Q62176	Rbm38	12	0					RNA-binding protein 38
Q62186	Ssr4	5	0	5	0			Translocon-associated protein subunit delta
Q62188	Dpysl3	23	0	201	0			Dihydropyrimidinase-related protein 3
Q62189	Snrpa	1	0	7	0			U1 small nuclear ribonucleoprotein A
Q62193	Rpa2	3	0					Replication protein A 32 kDa subunit
Q62205	Scn9a			2	0			Sodium channel protein type 9 subunit alpha
Q62209	Sycp1			1	0			Synaptonemal complex protein 1
Q62241	Snrpc			1	0			U1 small nuclear ribonucleoprotein C
Q62245	Sos1	1	1					Son of sevenless homolog 1
Q62266	Sprr1a	1	0	1	0			Cornifin-A
Q62267	Sprr1b	1	0	1	0			Cornifin-B
Q62277	Syp			67	0			Synaptophysin
Q62311	Taf6			1	0			Transcription initiation factor TFIID subunit 6
Q62318	Trim28	5	0	20	0			Transcription intermediary factor 1-beta
Q62348	Tsn	8	0	10	0			Translin
Q62351	Tfrc	7	0	1	0			Transferrin receptor protein 1
Q62376	Snrnp70			2	0			U1 small nuclear ribonucleoprotein 70 kDa
Q62383	Supt6h			1	0			Transcription elongation factor SPT6
Q62392	Phlda1			1	0			Pleckstrin homology-like domain family A member 1
Q62393	Tpd52	13	0	20	0			Tumor protein D52
Q62417	Sorbs1	3	0					Sorbin and SH3 domain-containing protein 1
Q62418	Dbnl	1	0	8	0			Drebrin-like protein
Q62419	Sh3gl1	3	0	20	0			Endophilin-A2
Q62420	Sh3gl2	3	0	86	0			Endophilin-A1
Q62421	Sh3gl3			1	0			Endophilin-A3
Q62422	Ostf1	5	0					Osteoclast-stimulating factor 1
Q62425	Ndufa4	1	0	30	0			NADH dehydrogenase [ubiquinone] 1 alpha subcomplex subunit 4
Q62426	Cstb	1	0	4	0			Cystatin-B
Q62433	Ndrg1	2	0	3	0			Protein NDRG1
Q62442	Vamp1			7	0			Vesicle-associated membrane protein 1
Q62443	Nptx1			1	0			Neuronal pentraxin-1
Q62446	Fkbp3	1	0	14	0			Peptidyl-prolyl cis-trans isomerase FKBP3
Q62448	Eif4g2	11	0	5	0			Eukaryotic translation initiation factor 4 gamma 2
Q62465	Vat1	15	0	33	0			Synaptic vesicle membrane protein VAT-1 homolog
Q62468	Vil1			5	0			Villin-1
Q62469	Itga2	12	0					Integrin alpha-2
Q62507	Coch	42	0					Cochlin
Q63739	Ptp4a1	2	0					Protein tyrosine phosphatase type IVA 1
Q63810	Ppp3r1			46	0			Calcineurin subunit B type 1
Q63836	Selenbp2	18	0	3	0			Selenium-binding protein 2
Q63844	Mapk3	6	0	50	0			Mitogen-activated protein kinase 3
Q63912	Omg			9	0			Oligodendrocyte-myelin glycoprotein
Q63932	Map2k2	7	0	12	0			Dual specificity mitogen-activated protein kinase kinase 2
Q63959	Kcnc3			1	0			Potassium voltage-gated channel subfamily C member 3
Q64010	Crk	12	0	21	0			Adapter molecule crk
Q640R3	Hepacam			15	0			Hepatocyte cell adhesion molecule
Q64105	Spr	14	0	20	0			Sepiapterin reductase
Q64133	Maoa			12	0			Amine oxidase [flavin-containing] A
Q64143	Pik3r3	3	0	2	0			Phosphatidylinositol 3-kinase regulatory subunit gamma
Q64176	Ces1e	2	0					Carboxylesterase 1E
Q641P0	Actr3b	6	0	5	0			Actin-related protein 3B
Q64213	Sf1			1	0			Splicing factor 1
Q64282	Ifit1	1	0					Interferon-induced protein with tetratricopeptide repeats 1
Q64288	Omp			102	0			Olfactory marker protein
Q64310	Surf4	9	0					Surfeit locus protein 4
Q64324	Stxbp2	6	0					Syntaxin-binding protein 2
Q64331	Myo6	22	0	55	0			Unconventional myosin-VI
Q64332	Syn2			192	0			Synapsin-2
Q64338	Pde1c			3	0			Calcium/calmodulin-dependent 3',5'-cyclic nucleotide phosphodiesterase 1C
Q64362	Aktip	3	0	1	0			AKT-interacting protein
Q64368	Dazl	1	0					Deleted in azoospermia-like
Q64373	Bcl2l1			2	0			Bcl-2-like protein 1
Q64374	Rgn	6	0	6	0			Regucalcin
[truncated: 2,146 more rows]
