# Supplementary figures and images for: Exceptional longevity of mammalian ovarian and oocyte macromolecules throughout the reproductive lifespan
Source: eLife journal article supplement (doi:10.7554/elife.93172), 2024-01-25

Figure 3—figure supplement 1A – source data 1

4-16% Tris-glycine gel, oocyte proteins lysate

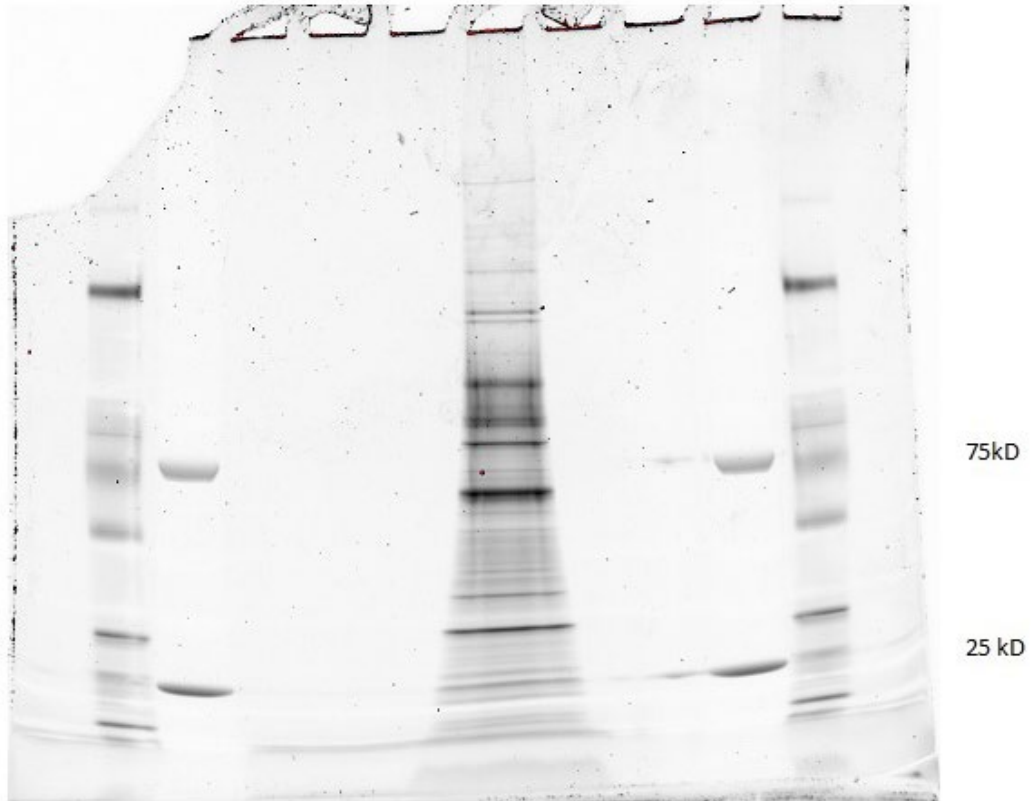

Supplement: fig3-figsupp1-data1 [file elife-93172-fig3-figsupp1-data1-v1.zip]
